1 **SLDP and LIPA mediate lipid droplet-plasma membrane tethering in**

2 ***Arabidopsis thaliana***

3 **Hannah Elisa Krawczyk<sup>1</sup>, Siqi Sun<sup>1</sup>, Nathan M. Doner<sup>2</sup>, Qiqi Yan<sup>3</sup>, Magdiel Lim<sup>1</sup>,**

4 **Patricia Scholz<sup>1</sup>, Philipp Niemeyer<sup>1</sup>, Kerstin Schmitt<sup>4</sup>, Oliver Valerius<sup>4,5</sup>, Roman**

5 **Pleskot<sup>6</sup>, Stefan Hillmer<sup>7</sup>, Gerhard H. Braus<sup>4,5</sup>, Marcel Wiermer<sup>3,5</sup>, Robert T.**

6 **Mullen<sup>2</sup>, Till Ischebeck<sup>1,5,8</sup>**

7 <sup>1</sup>University of Göttingen, Albrecht-von-Haller-Institute for Plant Sciences and Göttingen

8 Center for Molecular Biosciences (GZMB), Department of Plant Biochemistry, Göttingen,

9 Germany

10 <sup>2</sup>University of Guelph, Department of Molecular and Cellular Biology, Guelph, ON N1G

11 2W1, Canada

12 <sup>3</sup>University of Göttingen, Albrecht-von-Haller-Institute for Plant Sciences and Göttingen

13 Center for Molecular Biosciences (GZMB), Molecular Biology of Plant-Microbe

14 Interactions Research Group, Göttingen, Germany

15 <sup>4</sup>University of Göttingen, Institute for Microbiology and Genetics and Göttingen Center

16 for Molecular Biosciences (GZMB) and Service Unit LCMS Protein Analytics,

17 Department for Molecular Microbiology and Genetics, Göttingen, Germany

18 <sup>5</sup>University of Göttingen, Göttingen Center for Molecular Biosciences (GZMB),

19 Göttingen, Germany

20 <sup>6</sup>Institute of Experimental Botany of the Czech Academy of Sciences, Prague, Czech

21 Republic

22 <sup>7</sup>Heidelberg University, Electron Microscopy Core Facility, Heidelberg, Germany

23 <sup>8</sup>University of Münster, Institute of Plant Biology and Biotechnology (IBBP), Green

24 Biotechnology, Münster, Germany.

25

26 \*Author for correspondence: Till Ischebeck, Tel: +49 251 83 21784, Email: till.ischebeck@uni-  
27 muenster.de

28

29 **Short title:** Lipid droplet-plasma membrane tethering

30

31 **One-sentence summary:** SEED LIPID DROPLET PROTEIN1 and 2 and LIPID  
32 DROPLET PLASMA MEMBRANE ADAPTOR tether lipid droplets to the plasma  
33 membrane in seedlings of *Arabidopsis thaliana*.

34

35 The author responsible for distribution of materials integral to the findings presented in  
36 this article in accordance with the policy described in the Instructions for Authors  
37 ([www.plantcell.org](http://www.plantcell.org)) is: Till Ischebeck

38

### 39 **ABSTRACT**

40 Membrane contact sites (MCS) are inter-organellar connections that allow for the direct  
41 exchange of molecules, such as lipids or Ca<sup>2+</sup> between organelles, but can also serve to  
42 tether organelles at specific locations within cells. Here we identified and characterised  
43 three proteins that form a lipid droplet (LD)-plasma membrane (PM) tethering complex in  
44 plant cells, namely LD-localised SEED LD PROTEIN (SLDP) 1 and 2 and PM-localised  
45 LD-PLASMA MEMBRANE ADAPTOR (LIPA). Using proteomics and different protein-  
46 protein interaction assays, we show that both SLDPs associate with LIPA. Disruption of  
47 either *SLDP1* and *2* expression, or that of *LIPA*, leads to an aberrant clustering of LDs in  
48 *Arabidopsis* seedlings. Ectopic co-expression of one of the *SLDPs* with *LIPA* on the  
49 other hand is sufficient to reconstitute LD-PM tethering in *Nicotiana tabacum* pollen  
50 tubes, a cell type characterised by dynamically moving LDs in the cytosolic streaming.  
51 Further, confocal laser scanning microscopy revealed both SLDP2.1 and LIPA to be

52 enriched at LD-PM contact sites in seedlings. These and other results suggest that  
53 SLDP and LIPA interact to form a tethering complex that anchors a subset of LDs to the  
54 PM during post-germinative seedling growth in *Arabidopsis thaliana*.

55

## 56 INTRODUCTION

57 As knowledge on organelle-specific functions and their proteomes has expanded in  
58 recent years, there has been ever mounting interest in inter-organelle interactions  
59 that are in part facilitated by membrane contact sites (MCS) (Prinz *et al.*, 2020). MCS  
60 foster physical interactions and the exchange of molecules between organelles  
61 without the need of membrane fusion events. The transient connections are  
62 established through tethering proteins, connecting the membranes of interacting  
63 organelles and allowing for direct exchange of lipids, cellular signals (e.g., Ca<sup>2+</sup>,  
64 reactive oxygen species [ROS], etc) and/or other molecules (Baillie *et al.*, 2020; Prinz  
65 *et al.*, 2020; Rossini *et al.*, 2020).

66 It is well recognised that MCS can form between nearly all organelles  
67 (Eisenberg-Bord *et al.*, 2016; Valm *et al.*, 2017; Shai *et al.*, 2018; Baillie *et al.*, 2020).  
68 The endoplasmic reticulum (ER) and peroxisomes, for example, are organelles with  
69 well-described interactomes (Shai *et al.*, 2016; Zang *et al.*, 2020). Also, several multi-  
70 organelle MCS have been described, such as the three-way connection between  
71 mitochondria, ER, and lipid droplets (LDs) that promotes *de novo* lipogenesis in  
72 human adipocytes (Freyre *et al.*, 2019).

73 Although ER-derived LDs are known to engage in various MCS, the LD  
74 interactome is less well described than that of other organelles (Bohnert, 2020). LDs  
75 consist of a lipophilic core of neutral lipids, such as triacylglycerols (TAGs) and sterol  
76 esters, surrounded by a phospholipid monolayer and a variety of surface-associated  
77 'coat' proteins. Long believed to be an inert storage organelle, it is now widely  
78 accepted that LDs actively participate in a wide range of cellular processes involving  
79 lipids and their derivatives (Thiam and Beller, 2017; Welte and Gould, 2017;  
80 Ischebeck *et al.*, 2020). As such, rather than just housing storage lipids, LDs are now  
81 considered to be dynamic hubs for lipid homeostasis and specialised metabolism

82 (Schaffer, 2003). Furthermore, LDs can serve as a sink for reducing cytosolic free  
83 fatty acids (Fan *et al.*, 2017; Olzmann and Carvalho, 2019; de Vries and Ischebeck,  
84 2020) and ROS (Muliyil *et al.*, 2020), and also sequester potentially harmful proteins  
85 (Geltinger *et al.*, 2020) or histone complexes at the LD surface (Johnson *et al.*, 2018).

86 Given the established role(s) of MCSs in the non-vesicular transport of lipids  
87 (Cockcroft and Raghu, 2018), it is not surprising that LDs form contacts with many  
88 other organelles (Bohnert, 2020; Valm *et al.*, 2017; Gao and Goodman, 2015;  
89 Schuldiner and Bohnert, 2017; Rakotonirina-Ricquebourg *et al.*, 2021). The majority  
90 of these described LD MCS, however, were found mammalian or yeast cells.  
91 Knowledge in plants is so far still limited to LD-ER and LD-peroxisome MCS, which  
92 are involved in storage lipid accumulation (Cai *et al.*, 2015; Greer *et al.*, 2020; Pyc *et al.*,  
93 2021) and breakdown (Eastmond, 2006; Cui *et al.*, 2016), respectively. Likewise,  
94 while an LD-plasma membrane (PM) MCS was recently described in fly (*Drosophila*  
95 *melanogaster*) (Ugrankar *et al.*, 2019), no such connection has been described for  
96 plants.

97 SEED LD PROTEIN 1 (SLDP1) was lately reported as a plant-specific LD  
98 protein (Kretzschmar *et al.*, 2020) and, in *Arabidopsis thaliana*, has a close  
99 homologue, SLDP2. However, the function(s) of SLDP1 and/or SLDP2 are unknown.  
100 We show here that LDs in *sldp1 sldp2* double mutants display an aberrant subcellular  
101 positioning (i.e., clustering) during early seedling growth. In proteomic analyses of  
102 *sldp* mutants, we identified a novel PM-localised protein that serves as an interaction  
103 partner of SLDPs and which we termed LIPA (LIPID DROPLET PLASMA  
104 MEMBRANE ADAPTOR). Consistent with this premise, subcellular localisation  
105 studies in *Nicotiana tabacum* pollen tubes showed that ectopically-expressed LIPA  
106 localises to the PM, but is relocated to apparent PM-LD MCS when co-expressed  
107 with SLDP2. Moreover, in both *sldp2* and *sldp1 sldp2* mutants, LIPA is absent from

108 LD-enriched proteome fractions and *lipa* mutants phenocopy *sldp1 sldp2* mutants in  
109 terms of the aberrant clustering of LDs in cells during seed germination. Interaction of  
110 SLDPs and LIPA was confirmed using fluorescence resonance energy transfer  
111 fluorescence lifetime imaging microscopy (FRET-FLIM) and yeast two-hybrid (Y2H)  
112 assays. Based on these and other data, we provide a working model, where LIPA  
113 anchors SLDP-decorated LDs to the PM in plant cells.

114

## 115 **RESULTS**

### 116 **SLDP1 and 2 are members of a novel, plant-specific LD protein family and** 117 **contain a similar LD targeting signal**

118 We recently investigated the proteomes of LD-enriched fractions of Arabidopsis  
119 siliques, seeds and seedlings and, in doing so, identified several novel LD protein  
120 families (Kretzschmar *et al.*, 2020). Notably, some of these proteins were unique to  
121 plants, such that they had no obvious homologues in mammals and/or yeast, and  
122 they were also annotated to be of unknown function, suggesting that they serve novel  
123 roles related to LDs in plants.

124 One of the families of new Arabidopsis LD proteins we identified with no  
125 apparent homology to other proteins and no known function(s) included SLDP1  
126 (AT1G65090) and SLDP2 (AT5G36100). There are three and two splice variants of  
127 Arabidopsis SLDP1 and SLDP2, respectively, sharing 35.4% - 46.7% sequence  
128 identity (Figure 1A, Supplemental Figure 1). We previously showed that SLDP1.3  
129 targets LDs (Kretzschmar *et al.*, 2020) and we confirmed the same LD localisation for  
130 SLDP2.1 by transiently expressing the mVenus-tagged protein (i.e., SLDP2.1-  
131 mVenus) in *Nicotiana tabacum* pollen tubes (Figure 1B), which pose a well-  
132 established model plant cell system for studying LD protein localisation (Müller *et al.*,  
133 2017; Müller and Ischebeck, 2018; Kretzschmar *et al.*, 2018, 2020).

134 As indicated by bioinformatic analyses, both SLDP1.3 and SLDP2.1, as well as  
135 their related (spliced) protein variants, share a predicted amphipathic  $\alpha$ -helix  
136 sequence near their N-termini (amino acids 19-26 and 13-30, respectively) and an  
137 adjacent hydrophobic region of ~40 uncharged amino acids (amino acids residues  
138 31–69 and 25–62, respectively) (Figure 1A, 1C and 1D, Supplemental Figure 2), both  
139 of which are known to be key features of the LD targeting signals found in other LD  
140 proteins (Kory *et al.*, 2016; Olarte *et al.*, 2021). To test if these regions are indeed  
141 involved in LD targeting of SLDPs, we generated various truncated versions of  
142 SLDP1.3 and SLDP 2.1 and expressed them individually in *Nicotiana tabacum* pollen  
143 tubes. As shown in Figure 1B, both SLDP1.3<sup>19-81</sup>-mVenus and SLDP2.1<sup>13-75</sup>-mVenus,  
144 each including a putative amphipathic  $\alpha$ -helix and a hydrophobic sequence, targeted  
145 to Nile red-stained LDs, similar to their full-length protein counterparts. By contrast,  
146 SLDP1.3 <sup>$\Delta$ 1-81</sup>-mVenus and SLDP2.1 <sup>$\Delta$ 1-75</sup>-mVenus, lacking the corresponding N-  
147 terminal portion of each protein, did not target LDs, but instead localised to the  
148 cytosol (Figure 1B). Based on these findings, both SLDP1 and 2 proteins appear to  
149 share similar LD targeting information.

150

### 151 **Knockout of *SLDP* expression interferes with the subcellular distribution of** 152 **LDs during post-germinative seedling growth**

153 According to transcriptome data available at Arabidopsis AtGenExpress  
154 (Nakabayashi *et al.*, 2005; Schmid *et al.*, 2005; Winter *et al.*, 2007; Waese *et al.*,  
155 2017) and the Klepikova eFP browser (Klepikova *et al.*, 2016; Waese *et al.*, 2017),  
156 SLDP1 and SLDP2 are highly expressed in seeds. Consistent with this, we confirmed  
157 the expression of all splice variants of SLDP1 and SLDP2 in seeds via two-step  
158 reverse transcriptase-quantitative PCR (RT-qPCR) (Supplemental Figure 3).  
159 Furthermore, based on proteomic data, both proteins are also found in seedlings

160 (Kretzschmar *et al.*, 2020). We therefore reasoned that SLDPs might play a role in  
161 LD biology during these stages of development, and we investigated this possibility  
162 using a gene loss-of-function approach. Two sets of one Arabidopsis T-DNA and one  
163 CRISPR/Cas9 knockout mutant line each for *SLDP1* and *SLDP2* were generated  
164 (Figure 2A) and confirmed by genotyping (Supplemental Data S1). In addition,  
165 corresponding double knockout mutant lines of *SLDP1* and *SLDP2* were generated.  
166 RT-qPCR analyses confirmed that no full-length *SLDP1* or *SLDP2* transcripts were  
167 detectable in the *sldp1-1* and *sldp2-1* T-DNA mutant lines, respectively, or in the  
168 *sldp1-1 sldp2-1* double mutant (Supplemental Figure 4). *SLDP1* and *SLDP2*  
169 transcript levels were not significantly altered in the CRISPR/Cas9 *sldp1-2* and *sldp2-*  
170 *2* single or double mutant lines (relative to wild-type plants) (Supplemental Figure 4).  
171 However, cloning and sequencing of the respective cDNAs from these mutant lines  
172 confirmed CRISPR/Cas9-induced mutations (i.e., deletions) that resulted in  
173 premature stop codons in the *SLDP1* and *SLDP2* open reading frames  
174 (Supplemental Data S1).

175 In comparison to WT plants, neither single nor double T-DNA mutant lines of  
176 *SLDP* displayed any obvious growth or developmental phenotypes, including  
177 hypocotyl elongation in light- and dark-grown seedlings (Supplemental Figure 5A, B),  
178 and were also not strongly affected in the levels of the total fatty acids in seeds  
179 (Supplemental Figure 5C). In respect to the 1000 seed weight, the double T-DNA  
180 insertion line was also only slightly affected ( $19.4 \pm 0.2$  mg in WT and  $20.8 \pm 0.2$  in  
181 *sldp1-1* and *sldp2-1*). Furthermore, the degradation of total fatty acids during seed  
182 germination and early seedling growth in the *sldp* mutants was not significantly  
183 altered compared to WT (Supplemental Figure 5C), including the degradation of  
184 eicosenoic acid, which is specifically incorporated into TAGs in Arabidopsis seeds  
185 (Rylott *et al.*, 2003) (Supplemental Figure 5D). However, an aberrant LD phenotype



186 was readily observed in seedlings from both *sldp2* single and both *sldp1 sldp2*  
187 double mutant lines during germination and post-germinative growth. As shown in  
188 Figure 2B, and consistent with results presented in other studies of LDs in WT  
189 Arabidopsis seeds and seedlings (Cai *et al.*, 2015; Gidda *et al.*, 2016; Kretzschmar *et*  
190 *al.*, 2018), Nile red-stained LDs displayed a ‘typical’ subcellular distribution in  
191 rehydrated (mature) seeds and in seedlings from 12 h to 48 h after stratification. That  
192 is, in WT seeds and seedlings at 12 h, LDs in cotyledon cells (Figure 2B), as well as  
193 those in hypocotyl cells (Supplemental Figure 6), were often closely appressed. At  
194 the same stages, no obvious difference in LD morphology or distribution was  
195 observed between WT and any of the *sldp* mutant lines (Figure 2B), nor were there  
196 any obvious differences in storage vacuole morphology or distribution (Supplemental  
197 Figure 7). By 24 h to 48 h, after the completion of germination in Arabidopsis  
198 (Bewley, 1997), LDs in cotyledon cells in the WT and both *sldp1* single mutant lines  
199 were mostly positioned in close proximity to the PM (Figure 2B). However, at 36 h  
200 and 48 h in cotyledon cells of *sldp2* single and particularly *sldp1 sldp2* double  
201 mutants, LDs were not evenly distributed along the PM, but instead were noticeably  
202 clustered near the centre of the cell. (Figure 2B). A similar clustered LD phenotype  
203 was observed in hypocotyl cells in the *sldp1 sldp2* double mutants at 24 h to 48 h,  
204 but hypocotyls of the *sldp2* single mutants are less severely affected than its  
205 cotyledons (Supplemental Figure 6). Notably, Z-stack images of cotyledon and  
206 hypocotyl cells at 36 h, when the LD distribution phenotype was well pronounced  
207 (Figure 2B), and subsequent quantification of the LD distribution in these cells,  
208 confirmed that a significantly smaller proportion of LDs were located at cell periphery  
209 in the *sldp2* single and *sldp1 sldp2* double mutants compared to WT (Supplemental  
210 Figure 8). The LD clustering phenotype in cotyledon cells of the *sldp1-1 sldp2-1*  
211 double mutant was also observed by electron microscopy, whereas close contacts

212 between LDs and the PM were almost solely observed in WT cotyledon cells  
213 (Supplemental Figure 9). Taken together, these data indicate that SLDP1 and SLDP2  
214 are involved in proper subcellular distribution of LDs during post-germinative seedling  
215 growth in Arabidopsis.

216

## 217 **Comparative proteomic analyses reveal LIPA as a potential interaction partner** 218 **of SLDP2**

219 In order to further explore the functions of SLDPs during post-germinative seedling  
220 growth in Arabidopsis, we tested if the loss of either SLDP1 or SLDP2, or both  
221 proteins, has an influence on the composition of the LD proteome. To this end,  
222 proteomic analyses of WT, *sldp1-1*, *sldp2-1* and *sldp1-1 sldp2-1* mutant seedlings  
223 (36 h after seed stratification) were performed on LD-enriched fractions, as well as  
224 total cellular extracts (abbreviated as TE) (Supplemental Figure 10A-C). Initially,  
225 protein levels of SLDP1 and SLDP2 in the LD proteomes of the *sldp* mutant lines  
226 were assessed. As shown in Figure 3A, SLDP1 protein was nearly absent from LD-  
227 enriched fractions derived from *sldp1-1* and *sldp1-1 sldp2-1* mutant seedlings.  
228 Similarly, SLDP2 was not detected in the *sldp2-1* and *sldp1-1 sldp2-1* LD proteomes,  
229 but also in WT and *sldp1-1* derived LD proteomes it was only detectable in one of  
230 three replicates each. This is consistent with SLDP2 (and SLDP1) being a low  
231 abundant LD protein (Kretzschmar *et al.*, 2020).

232 We then compared the TE and LD-enriched fractions to assess any differences  
233 in protein composition between WT and *sldp* mutant seedlings. For this, stringent  
234 filters (i.e., proteins only detected at least three times in at least one group and  
235 identified by at least two peptides) were applied to the whole data set (see  
236 Supplemental Data S2 for raw LFQs and S3 for normalised and filtered LFQs).  
237 Imputations were performed so that fold changes could also be calculated for

238 proteins absent in one of the fractions (Supplemental Data S4). Comparisons of the  
239 TE fractions did not reveal any statistically significant differences between the WT  
240 and any of the *sldp* mutants (Supplemental Figure 10D). Likewise, comparisons of  
241 known LD proteins from LD-enriched fractions of WT and *sldp* mutants revealed no  
242 significant changes (Supplemental Data S4). However, two other proteins were found  
243 to be significantly differentially abundant in LD fractions of WT and *sldp* mutant  
244 seedlings: RING DOMAIN LIGASE2 (RGLG2) and LIPA (Figure 3B), with LIPA being  
245 absent in LD fractions from both *sldp2-1* and *sldp1-1 sldp2-1* seedlings and RGLG2  
246 being more abundant in *sldp1-1 sldp2-1* seedling LD fractions (Figure 3B;  
247 Supplemental Figure 10E). Moreover, in WT and *sldp1-1*, LIPA was significantly  
248 enriched in LD fractions (i.e. absent from TE fractions, Figure 3C, D; Supplemental  
249 Figure 10E). As expected, a similar enrichment of LIPA was not found in LD fractions  
250 from *sldp2-1* and *sldp1-1 sldp2-1*, as LIPA was not detected in these samples (Figure  
251 3D). Taken together, these data suggest that LIPA is associated with isolated LDs.  
252 They further indicate that SLDPs might act as a link between isolated LDs and LIPA  
253 and that LIPA is therefore important to mediate some of the functions of SLDPs. The  
254 link of SLDP to a higher abundance of RGLG2 is however harder to interpret.  
255 Furthermore, LIPA, in comparison to RGLG2 (Cheng *et al.*, 2012; Yu *et al.*, 2021),  
256 has previously not been explored in any detail. In conclusion, we aimed to further  
257 elucidate the function of LIPA, while the role of RGLG2 could be studied in the future.

258

### 259 **Co-expressed LIPA and SLDP2 mutually influence their subcellular localisation**

260 Based on information provided by The Arabidopsis Information Resource (TAIR)  
261 (Berardini *et al.*, 2015), LIPA has no annotated functions. While LIPA homologues  
262 exist in other plant species, they are absent in non-plant species, indicating that  
263 LIPA, like SLDP, is a plant-specific protein. LIPA is a 144 amino-acid-long protein

264 with no described protein domains/motifs or putative transmembrane domains, nor  
265 any other obvious physicochemical features consistent with an LD targeting signal  
266 (e.g., putative amphipathic helix and/or hydrophobic sequence, Supplemental Figure  
267 11A-C).

268 To assess the subcellular localisation of LIPA in plant cells, we transiently  
269 expressed the protein as an mVenus-tagged fusion protein in *N. tabacum* pollen  
270 tubes. As shown in Figure 4A, C-terminal mVenus-tagged LIPA (LIPA-mVenus)  
271 localised to the cytosol, while its N-terminal mVenus-tagged counterpart, mVenus-  
272 LIPA, localised predominantly to the PM. Notably, in *Agrobacterium*-transformed *N.*  
273 *benthamiana* leaves, another well-established plant cell model system for studying  
274 protein localisation (Sparkes *et al.*, 2006), no apparent differences in localisation  
275 were observed between N- or C-terminal-GFP-tagged LIPA. Both LIPA fusion  
276 proteins localised to the PM and also the cytosol, which are closely appressed in  
277 these cells due to presence of the large central vacuole (Supplemental Figure 12A).

278 While LIPA is localised to the PM (and cytosol) in transiently-transformed plant  
279 cells (Figure 4A, Supplemental Figure 12A), proteomic analysis indicated that LIPA  
280 co-purified with SLDP2-containing LDs, but not with LDs lacking SLDP2 (Figure 3B,  
281 Supplemental Figure 10E,F). Hence, LIPA appears to be a PM protein that also  
282 associates with LDs in an SLDP2-dependent manner. To further test this hypothesis,  
283 we co-expressed Arabidopsis SLDP2.1 and LIPA. *N. tabacum* pollen tubes, lacking  
284 homologues of both SLDPs and LIPA based on previous proteomic data  
285 (Kretzschmar *et al.*, 2018), were chosen as expression system to avoid endogenous  
286 SLDP and/or LIPA from potentially interfering with localisation analyses. SLDP2.1  
287 (and SLDP1.1) tagged with mCherry showed the same LD-localisation in pollen tubes  
288 as its mVenus-tagged counterparts (compare images in Supplemental Figure 13A  
289 and Figure 1C). As shown in Figure 4B, co-expression of SLDP2.1-mCherry and

290 LIPA-mVenus (C-terminally tagged) in pollen tubes resulted in LIPA being re-located  
291 from the cytosol to LDs (compare with images of LIPA-mVenus expressed on its own;  
292 Figure 4A). A similar relocation was observed when LIPA-mVenus was co-expressed  
293 with either SLDP1.3-mCherry or the non-tagged (native) versions of SLDP1.3 or  
294 SLDP2.1 (Supplemental Figure 13B).

295 Next, we assessed the localisation of co-expressed SLDP2.1-mCherry and  
296 mVenus-LIPA (N-terminally tagged). As shown in Figure 4B, this co-expression  
297 resulted in a change of localisation of both proteins: co-expressed SLDP2.1 and LIPA  
298 were both dually localised to LDs and the PM (Figure 4B), unlike their localisation  
299 exclusively to LDs or the PM, respectively, when they were expressed on their own  
300 (Figure 4A, Figure 1B). Furthermore and as discussed below, a significant proportion  
301 of LDs decorated with SLDP2.1-mCherry and mVenus-LIPA appeared to be  
302 positioned close to the PM instead of distributed in the cytosol. By contrast, when  
303 mVenus-LIPA was co-expressed with SLDP1.3-mCherry, the proteins partially co-  
304 localised, but an increase in the association of LDs with the PM was not observed  
305 (Supplemental Figure 13B, Figure 4C). Likewise, in *N. benthamiana* leaves,  
306 SLDP2.1-mCherry localised to LDs when expressed on its own and both N- and C-  
307 terminal GFP-tagged versions of LIPA were re-located from the cytosol and PM to  
308 LDs when co-expressed with SLDP2.1-mCherry (Supplemental Figure 12B, C).

309 Taken together these data indicate that SLDPs and LIPA can influence each  
310 other's localisation in plant cells, such that SLDP2.1 and SLDP1.3 can recruit LIPA to  
311 LDs, while LIPA can recruit at least SLDP2.1 and LDs to the PM.

312

### 313 **LIPA can immobilise SLDP2-containing LDs at the PM in pollen tubes**

314 A consistent observation from experiments involving co-expressed SLDP2 and LIPA  
315 in pollen tubes (Figure 4B) was the distinct positioning of LDs at the PM in these

316 cells. That is, in pollen tubes co-expressing SLDP2.1-mCherry and mVenus-LIPA,  
317 LDs appeared to be located in close proximity to the PM more often as compared to  
318 cells expressing either protein on its own (Figure 4B; compare also with images in  
319 Figure 1B and 4A). This suggests that SLDP2 and LIPA together are involved in the  
320 positioning of LDs, or at least a subset thereof, at the PM. To quantify this  
321 positioning, LDs in vicinity to the PM were manually counted, and put in relation to  
322 the pollen tube length in the taken micrographs for all transient expression  
323 combinations with SLDP2.1 and/or LIPA (Figure 4C). Consistent with the  
324 observations described above, co-expression of SLDP2.1-mCherry and mVenus-  
325 LIPA significantly increased the number of LDs in proximity to the PM, compared to  
326 either protein expressed alone. However, pollen tubes co-expressing SLDP2.1-  
327 mCherry and C-terminal-tagged LIPA-mVenus (or LIPA-mVenus alone) did not  
328 appear to differ in the number of LDs in proximity to PM, reinforcing our earlier  
329 conclusion that the C-terminus of LIPA is important for its association with the PM  
330 (Figure 4C).

331 To further test the premise that SLDPs and LIPA are important for the  
332 positioning of LDs at the PM, time-lapse imaging of Nile red-stained LDs in LIPA and  
333 SLDP2.1 co-transformed pollen tubes was performed. Pollen tube growth was  
334 extended by 3 h in comparison to previous experiments in order to give the tubes  
335 more time for protein expression and potential protein interactions. In control pollen  
336 tubes expressing mVenus alone (Supplemental Figure 13C, Supplemental movie  
337 S1), as well as in pollen tubes expressing mVenus-LIPA or SLDP2.1-mVenus alone  
338 (Figure 5, Supplemental movie S2-S3), LDs moved dynamically via cytoplasmic  
339 streaming. In contrast, in pollen tubes co-expressing mVenus-LIPA and SLDP2.1-  
340 mVenus, LDs were mostly localised and immobilised at the PM (Figure 5,  
341 Supplemental movie S4), as were, to a lesser extent, LDs in pollen tubes co-

342 expressing SLDP1.3-mCherry and mVenus-LIPA (Supplemental Figure 13C,  
343 Supplemental movie S5-S6). Notably, the observed immobilisation of LDs at the PM  
344 was not due to the fluorophore appended to LIPA and SLDP. That is, co-expression  
345 of native (non-tagged) variants of LIPA and SLDP1.3 or SLDP2.1, along with mVenus  
346 alone serving as a cell transformation marker, yielded similar results and, in fact,  
347 even a more pronounced association of LDs with the PM in SLDP1.3 and LIPA co-  
348 expressing pollen tubes (Supplemental Figure 13C, Supplemental movies S7-S8).

349

### 350 **A coiled-coil domain in LIPA mediates its interaction with SLDP2 at LDs**

351 While *in silico* analysis of Arabidopsis LIPA did not yield any known protein functional  
352 domains/motifs, the prediction program COILS (Lupas *et al.*, 1991) revealed a  
353 putative coiled-coil domain in LIPA at residues 60–113 (Supplemental Figure 11D).  
354 Further structural predictions using the AlphaFold2 algorithm (Jumper *et al.*, 2021;  
355 Varadi *et al.*, 2022), which recently generated highly accurate structural models for  
356 eleven proteomes, including Arabidopsis, revealed that LIPA likely contains four  $\alpha$ -  
357 helices (H1-H4), connected by flexible unstructured linkers (Figure 6A). H1, H2 and  
358 the majority of H3 are predicted with high confidence, while the shortest helix, H4, is  
359 of lower confidence and is a part of the otherwise unstructured C-terminus. The  
360 putative coiled-coil domain of LIPA corresponds to the helices H2 and H3.

361 To analyse the role of the putative coiled-coil domain in subcellular localisation  
362 of LIPA, a truncated version of LIPA, consisting of the coiled-coil domain alone  
363 appended to mVenus (i.e., mVenus-LIPA<sup>64-113</sup>), was expressed in pollen tubes, either  
364 on its own or together with SLDP2.1. As shown in Figure 6B, mVenus-LIPA<sup>64-113</sup>  
365 expressed alone localised to the cytosol, but was recruited to LDs upon co-  
366 expression with SLDP2.1-mCherry, consistent with results of co-expressed full-length

367 LIPA and SLDP2.1 (Figure 4A, B). This indicates that the coiled-coil domain of LIPA  
368 is sufficient for its SLDP-mediated relocation to LDs.

369 The importance of the putative coiled-coil region in LIPA was also assessed by  
370 replacing a leucine and a valine residue at positions 80 and 98, respectively, with  
371 prolines, in order to disrupt the putative coiled-coil structure (Chang *et al.*, 1999;  
372 Cheng *et al.*, 2001); refer to the COILS prediction of LIPA L<sup>80P</sup> V<sup>98P</sup> mutant protein  
373 shown in Supplemental Figure 11D). The predicted structure of LIPA L<sup>80P</sup> V<sup>98P</sup>  
374 mutant protein was also assessed using the AlphaFold2 algorithm (Mirdita *et al.*,  
375 2021, Preprint). Although the algorithm is generally not well suited for predicting  
376 effects of individual point mutations (Akdel *et al.*, 2021, Preprint), helix H3 was still  
377 predicted to be significantly shorter in the mutant protein than in native LIPA (Figure  
378 6A). Notably, LIPA L<sup>80P</sup> V<sup>98P</sup> mutant protein with either N- or C-terminally appended  
379 mVenus, irrespective of co-expression with SLDP, localised in a similar manner as its  
380 native LIPA counterparts, i.e., to the PM and/or cytosol, but not to LDs (Figure 6C,  
381 Supplemental Figure 14). Thus, the predicted coiled-coil region of LIPA appears to be  
382 both sufficient and necessary to induce LIPA-mediated relocation of SLDP2-  
383 containing LDs.

384

### 385 **Both FRET/FLIM and Y2H assays confirm SLDP-LIPA interaction**

386 To further test the hypothesis that SLDPs and LIPA interact, both FRET-FLIM and  
387 Y2H analyses were performed.

388 FRET-FLIM experiments were carried out in tobacco pollen tubes. As shown in  
389 Figure 7A, the co-expression of SLDP1.3-mVenus or SLDP2.1-mVenus with  
390 mCherry-LIPA led to a significant decrease in the fluorescence lifetime of mVenus in  
391 comparison to the expression of the SLDP1.3-mVenus and SLDP2.1-mVenus on  
392 their own. These results indicate that SLDP and LIPA come in close proximity at the



393 surface of LDs. The putative interaction of SLDP and LIPA was also assessed testing  
394 truncated versions of SLDP1 and 2 that mislocalise to the cytosol in pollen tubes, i.e.,  
395 SLDP1.3<sup>Δ1-81</sup> and SLDP2.1<sup>Δ1-75</sup> (refer to Figure 1B). Similar to full-length SLDP1.3-  
396 mVenus and SLDP2.1-mVenus, co-expression of SLDP1.3<sup>Δ1-81</sup> or SLDP2.1<sup>Δ1-75</sup> with  
397 LIPA-mCherry, led to a significant reduction in the fluorescence lifetime of mVenus,  
398 while co-expression with mCherry alone did not (Figure 7B). These results indicate  
399 that the N-termini of the SLDPs are not required for the interaction with LIPA and that  
400 an interaction does not depend on the localisation to LDs.

401 Additionally, the interaction of SLDP and LIPA or mutant versions thereof was  
402 also addressed in Y2H assays. As shown in Figure 7C, results showed that both,  
403 SLDP1.3 and SLDP2.1, interact with full-length LIPA or the putative coiled-coil  
404 domain of LIPA (LIPA<sup>64-113</sup>), but not with LIPA L<sup>80</sup>P V<sup>98</sup>P (Figure 7C). As expected,  
405 yeast expressing either SLDP1, SLDP2 or LIPA with only the corresponding 'empty'  
406 vector did not grow on selection media. Further, Y2H assays revealed that SLDP1.3,  
407 SLDP2.1 and LIPA do not self-associate, nor do SLDP1.3 and SLDP2.1 associate  
408 with each other (Supplemental Figure 15).

409

#### 410 **LIPA targets the PM via its C-terminal polybasic region**

411 Our experiments suggest that the putative coiled-coil region of LIPA (residues 60-  
412 113) is involved in binding SLDPs, but is not sufficient for its localisation to the PM  
413 (Figure 6B). In order to determine the region(s) in LIPA required for PM targeting,  
414 several truncated versions of the protein were generated and expressed as N-  
415 terminal mVenus fusions in tobacco pollen tubes. As shown in Figure 8A, the C-  
416 terminus of LIPA (residues 107-144), which includes a polybasic region (residues  
417 107-134; Figure 8B), localised to the PM similar to full-length LIPA. By contrast, a  
418 shorter C-terminal region of LIPA (residues 120-144) was mislocalised to the cytosol,

419 indicating that the polybasic region in LIPA is necessary for its PM targeting (Figure  
420 8B). We also removed additional amino acids from the C-terminal end of the LIPA in  
421 the context of the LIPA<sup>107-144</sup> mutant, including the C-terminal cysteine residue  
422 (LIPA<sup>107-143</sup>), which could potentially serve as a lipid-anchor site, and the C-terminal  
423 10 or 21 amino acids (LIPA<sup>107-134</sup> and LIPA<sup>107-123</sup>, respectively). Overall, the  
424 localization results for these LIPA mutants indicated that the C-terminal 10 amino  
425 acids are not essential for PM targeting, while deletions of residues within the  
426 polybasic region abolished the PM targeting of LIPA (Figure 8B). Taken together, the  
427 amino acids 107-134 are able to bind the PM.

428 To further investigate the interaction of LIPA with the PM at the molecular  
429 level, we utilised coarse-grained molecular dynamics (MD) simulations. This  
430 computational approach has been successfully used to study the interaction of a  
431 wide variety of membrane proteins with a lipid bilayer (Corradi *et al.*, 2019; Marrink *et*  
432 *al.*, 2019). Here, we used the recently released version (3.0) of the Martini force field  
433 (Souza *et al.*, 2021), which was shown to accurately describe the membrane-binding  
434 behaviour of several membrane proteins and to correctly identify pivotal amino acid  
435 residues involved in the interaction (Srinivasan *et al.*, 2021). To study LIPA, the  
436 simulated system contained one molecule of LIPA, ions, water molecules, and a  
437 complex phospholipid bilayer with a composition mimicking the negatively-charged  
438 plant cell PM (Wassenaar *et al.*, 2015). We performed five independent MD  
439 simulations with different starting velocities, resulting in a total of 5  $\mu$ s simulation  
440 time. During the simulations, LIPA displayed an on/off membrane binding similarly to  
441 the behaviour reported for other membrane proteins (Srinivasan *et al.*, 2021)  
442 (Supplemental Figure 16). Figure 8C shows selected snapshots from the MD  
443 simulations depicting unbound and membrane-bound states of LIPA (See also  
444 Supplemental movie S9). We then quantified the binding events by generating a

445 probability density distribution using the kernel density estimation method and, as  
446 shown in Figure 8D, the calculated probability density distribution revealed a  
447 significant population of LIPA in the membrane-bound state. Next, we investigated  
448 amino acid residues of LIPA potentially involved in the interaction with negatively  
449 charged phospholipids. In agreement with the results from our truncation analyses of  
450 LIPA (Figure 8A), the highest number of contacts is located at the C-terminus of LIPA  
451 (Figure 8E). In addition, we also observed a contribution of H1 and, to a lesser  
452 extent, of the adjacent flexible region, to the interaction of LIPA with negatively  
453 charged phospholipids (Figure 8E). Interestingly, the region corresponding to the  
454 helical/coiled-coil domain (i.e., H3) involved in the LIPA-SLDP interaction (Figure 6),  
455 showed no interaction with the phospholipids (Figure 8E), further corroborating the  
456 role of this region in protein-protein interactions (Figure 8E).

457

#### 458 ***lipa* mutants phenocopy *sldp1 sldp2* mutants in their aberrant subcellular** 459 **distribution of LDs during post-germinative seedling growth**

460 Given that SLDP and LIPA appear to act together in the positioning of LDs at the PM,  
461 we next tested whether disruption of *LIPA* would have a similar effect on the  
462 subcellular distribution of LDs, as observed upon disruption of *SLDP* (Figure 2). To  
463 this end, two independent Arabidopsis mutant lines of *LIPA* were generated, a T-DNA  
464 insertional line, *lipa-1*, and a CRISPR/Cas9 deletion line, *lipa-2*, which is devoid of  
465 most of the *LIPA* open reading frame (Figure 6A, Supplemental Data S1). RT-qPCR  
466 analyses confirmed a lack of full-length *LIPA* transcripts in both mutant lines  
467 (Supplemental Figure 17). Time-course imaging of Nile red-stained LDs in cotyledon  
468 and hypocotyl cells in WT and both *lipa-1* and *lipa-2* rehydrated (mature) seeds and  
469 seedlings after stratification, was performed as described above for the *sldp* mutants  
470 (Figure 9B, Supplemental Figure 6; compare with images presented in Figure 2B).

471 While again no obvious differences in LD distribution or storage vacuole appearance  
472 were observed in WT and *lipa* mutant rehydrated seeds (Supplemental Figure 7), an  
473 LD-clustering phenotype similar to *sldp2* and *sldp1 sldp2* seedlings at 24 and 36 h  
474 was readily observed (Figure 9B, Supplemental Figure 6B). Additionally, as  
475 described for *sldp* mutants, Z-stack images of cotyledon and hypocotyl cells in *lipa*  
476 mutants at the 36-h time point and quantification of the LD distribution in these cells  
477 were performed and revealed significant differences in the LD distribution as  
478 compared to WT cells (Supplemental Figure 8). These results provide further  
479 evidence that SLDP2 and LIPA act together in the proper positioning of LDs at the  
480 PM during post-germinative seedling growth.

481

#### 482 **Both mGFP-LIPA and SLDP-mCherry localise to contact sites between LDs and** 483 **the PM**

484 Previous results hint at a putative MCS between LDs and the PM, formed through  
485 interaction of LIPA and SLDP. On that account, we next investigated whether these  
486 proteins are specifically enriched at LD-PM contact sites in seedlings. Therefore,  
487 Arabidopsis transgenic lines stably expressing *SLDP1.3* and *SLDP2.1* (under control  
488 of the 35S promoter) appended to a C-terminal mCherry were assayed for their  
489 subcellular localisation in hypocotyl cells of 40-h old seedlings. As shown in Figure  
490 10A and 10B, both SLDP1.3-mCherry and SLDP2.1-mCherry localised to the surface  
491 of LDs, as evidenced by the torus-shaped fluorescence patterns surrounding the  
492 fluorescence attributable to the BODIPY-stained neutral lipids inside the LDs.  
493 However, SLDP fluorescence, particularly SLDP2.1-mCherry, was often enriched at  
494 distinct sites on the LD surface that were presumably adjacent to the PM (Figure 10  
495 B), suggesting that especially SLDP2.1 preferentially localises at LD-PM contact sites.  
496 Similarly, eGFP-LIPA stably expressed in the Arabidopsis *lipa-1* background

497 localised to the surface of LDs in hypocotyl cells and was often enriched at apparent  
498 LD-PM contact sites (as shown by staining of LDs with Nile Red and the PM with  
499 FM4-64).

500

501

502

## 503 **DISCUSSION**

504 While plant LD research has yielded a number of significant advancements in recent  
505 years (Lundquist *et al.*, 2020; Ischebeck *et al.*, 2020; Kang *et al.*, 2021), many  
506 important questions related to plant LD biology remain unanswered, including if and  
507 how they interact with other organelles and subcellular structures. Here, we took  
508 advantage of the recent proteomics-based identification of several novel LD-  
509 associated proteins (Kretzschmar *et al.*, 2020) and characterised two members of the  
510 plant-specific SLDP family, SLDP1 and SLDP2. We showed that the LD-association  
511 of SLDPs is mediated by an N-terminal predicted amphipathic and hydrophobic  
512 region (Figure 1), similar to LD targeting sequences reported previously for other LD-  
513 localised proteins (Wilfling *et al.*, 2013; Kretzschmar *et al.*, 2018; Pyc *et al.*, 2017).  
514 Moreover, in *Arabidopsis sldp* mutant seedlings, LDs display an aberrant subcellular  
515 distribution, with LDs clustering in the centre of the cell and not, as observed in wild-  
516 type seedlings, aligning along the PM (Figure 2).

517 We further showed that LIPA is associated with isolated LDs, depending on the  
518 presence of SLDP2 (Figure 3) and LDs in *Arabidopsis lipa* mutant seedlings  
519 displayed an aberrant clustering phenotype, similar to that observed in *sldp* mutant  
520 seedlings. Microscopic analyses revealed that transiently expressed LIPA localises to  
521 the PM in pollen tubes, but, upon co-expression with SLDP, is also found at LDs.

522 Conversely, SLDP is partially re-located to the PM upon co-expression with LIPA  
523 (Figure 4). Moreover, we observed that at least a subset of LDs in LIPA and SLDP  
524 co-expressing pollen tubes are conspicuously immobilised at the PM and not  
525 streaming throughout the cytoplasm (Figure 4). How exactly LIPA associates with the  
526 PM remains unclear, as no putative transmembrane domains were detected within  
527 the LIPA protein sequence. Based on structural modelling and truncation analyses,  
528 though, we suggest that LIPA might bind the plasma membrane through electrostatic  
529 interactions of a positively charged polybasic sequence near LIPA's C-terminus (in  
530 the region of amino acids 107-134) which could interact with negatively charged head  
531 groups of anionic lipids (Noack and Jaillais, 2020). We cannot rule out, however, that  
532 PM-association of LIPA might also require interaction with additional PM-localised  
533 protein(s), or that these might additionally stabilise the interaction (given our  
534 modellings display LIPA as a flexible protein that dynamically binds the PM (Figure  
535 8C).

536 Lastly, we found that SLDPs and LIPA were enriched at contact sites between  
537 LDs and the PM in seedlings (Figure 10). Based on these and other results, we  
538 propose a working model (Figure 11) in which LIPA associates with the PM via a C-  
539 terminal region and, based on Y2H and FRET/FLIM experiments (Figure 7), likely  
540 directly interacts with SLDPs through its putative coiled-coil domain, a protein  
541 structural domain well-known to be involved in mediating protein-protein interactions  
542 (Mier *et al.*, 2017). SLDPs in turn are anchored to LDs via their N-termini and then,  
543 through interaction with LIPA, tether LDs to the PM (i.e., forming an LD-PM MCS)  
544 during post-germinative seedling growth.

545 As to the function of a putative LD-MCS formed through interaction of SLDP  
546 and LIPA, we can only speculate. LDs are lipid storage sites and MCS of LDs are  
547 often involved in lipid transfer processes (Salo *et al.*, 2019; Bohnert, 2020). In this

548 regard, LDs in plant seedlings have mostly been considered as a source of acyl  
549 chains to fuel seedling establishment (Yang and Benning, 2018). Consequently,  
550 previous studies on LD-organelle MCS in plants have focused primarily on how LD-  
551 peroxisome MCS help facilitate the mobilisation of stored lipid reserves in LDs via  
552 peroxisomal  $\beta$ -oxidation (Esnay *et al.*, 2020). Our results extend this work by  
553 showcasing a possible additional LD-involving MCS during post-germinative seedling  
554 growth: LDs in seedlings might be needed at the PM, either to provide lipids or to  
555 buffer (i.e., store) excess and potentially cytotoxic lipids produced during membrane  
556 repair and/or growth. More generally, LD-PM MCS might be required for maintaining  
557 PM lipid homeostasis, as has been shown for e.g. LD-ER MCS (Velázquez *et al.*,  
558 2016). The importance of this LD-PM MCS might therefore only come into effect  
559 upon stress conditions (such as salt, freezing, mechanical, etc.), when membrane  
560 composition has to be remodelled. This would explain the lack of any obvious growth  
561 and/or developmental phenotypes in the *sldp* and *lipa* mutants, which were examined  
562 under laboratory conditions in this study, despite their striking cellular (LD)  
563 phenotype.

564       Recently, several tri-organelle contact sites involving LDs and the ER have  
565 been described in mammals, yeast and insects (Freyre *et al.*, 2019; Hariri *et al.*,  
566 2019; Ugrankar *et al.*, 2019). As LDs are often associated with the ER (Hugenroth  
567 and Bohnert, 2020), another interesting question arising is whether the ER might be  
568 involved in the observed LD-PM MCS, as well. While the work presented here does  
569 not provide direct evidence for this hypothesis, it was recently found that SEIPIN, an  
570 ER-membrane protein that participates in LD biogenesis (Sui *et al.*, 2018), interacts  
571 with the ER-associated protein VAP27-1 (vesicle-associated membrane protein  
572 (VAMP)-associated protein 27-1) at ER-LD MCS (Greer *et al.*, 2020). VAP27-1 is  
573 also involved in tethering the ER to the PM via interaction with SYT1 (Siao *et al.*,

574 2016), a homologue of mammalian extended synaptotagmins, which is known to be  
575 important during abiotic stress responses (Yamazaki *et al.*, 2008; Schapire *et al.*,  
576 2008). Given that mammalian extended synaptotagmins are involved in lipid transfer  
577 (Schauder *et al.*, 2014; Yu *et al.*, 2016), a three-way MCS involving LD, ER and PM  
578 could serve as a key hub for lipid homeostasis at the plant PM.

579 Future work will now be aimed at investigating these possibilities by uncovering  
580 the mechanistic details underlying the putative SLDP-LIPA tethering complex  
581 reported here, as well as elucidating the physiological importance of LD-PM MCSs in  
582 seedlings and other tissues.

583

## 584 **Experimental Procedures**

### 585 **Plant material and growth conditions**

586 All *Arabidopsis thaliana* (L.) plants employed the ecotype Col-0 or were derived from  
587 it in the case of T-DNA and CRISPR/Cas9 mutant lines. They were grown in a  
588 climate chamber (York) in 60 % relative humidity, with a constant temperature of 23  
589 °C and under a 16 h/8 h day/night cycle with a daytime light intensity of 150  $\mu\text{mol}$   
590  $\text{photons m}^{-2} \text{s}^{-1}$  (the climate chamber was equipped with LuxLine Plus F36W 830  
591 Warm White de Luxe fluorescent tubes; Osram Silvania). Plants were either grown  
592 on soil or on half-strength MS medium (Murashige and Skoog, 1962) supplemented  
593 with 0.8 % (w/v) agar with or without 1 % (w/v) sucrose (as indicated) and stratified  
594 for four days at 4 °C in the dark. Seeds grown on medium were surface sterilised in 6  
595 % sodium hypochlorite solution for 15-20 minutes. For hygromycin selection, half-  
596 strength MS plates were supplemented with 25  $\mu\text{g/ml}$  hygromycin and 1 % (w/v)  
597 sucrose, stratified for two days at 4 °C, subjected to light for 4 h and then kept  
598 vertically in the dark for three days. Hygromycin-resistant seedlings were transferred



599 to half-strength MS + 1 % (w/v) sucrose without hygromycin for one week prior to  
600 transplanting them into soil.

601 Tobacco (*Nicotiana tabacum* L. cv. Samsun-NN) plants were grown in the  
602 greenhouse as previously described in order to collect pollen (Rotsch *et al.*, 2017).  
603 Plants were kept under 14 h of light from mercury-vapor lamps in addition to sunlight.  
604 Light intensities reached 150 – 300  $\mu\text{mol m}^{-2} \text{sec}^{-1}$  at the flowers and 50 – 100  $\mu\text{mol}$   
605  $\text{m}^{-2} \text{sec}^{-1}$  at leaves at mid-height. Temperature was set to 16 °C at night and 21 °C  
606 during the day with a humidity of 57–68%.

607 *Nicotiana benthamiana* plants were grown in soil at 22 °C with a 16-h/8-h  
608 day/night cycle and 50  $\mu\text{E}\cdot\text{m}^{-2}\text{s}^{-1}$  light intensity.

609

#### 610 **T-DNA lines**

611 Knockout lines of *SLDP1*, *SLDP2* and *LIPA* were generated. The commercially  
612 available T-DNA insertional lines SALK\_204434C (*sldp1-1*, T-DNA inserted in intronic  
613 region behind base 1028) and SALK\_068917 (*sldp2-1*, T-DNA inserted in first exon  
614 behind base 42) and Gabi-KAT 723C08 (*lipa-1*, T-DNA inserted behind base 20)  
615 were used, and CRISPR/Cas9 was used to generate *sldp1-2*, *sldp2-2*, and *lipa-2*  
616 (see *below*). Sequence alignments and predicted protein products of all analysed  
617 mutant lines are shown in Supplemental Data S1.

618

#### 619 **CRISPR/Cas9**

620 To generate CRISPR/Cas9 mutants, sgRNAs were designed using the Cas-Designer  
621 and Cas-OFFinder at <http://www.rgenome.net/> for a SpCas9 protospacer adjacent  
622 motif (PAM) sequence and with a length of 19 bp (without PAM) against the  
623 *Arabidopsis thaliana* (TAIR10) genome (Bae *et al.*, 2014; Park *et al.*, 2015). Cloning  
624 was performed as described previously (Xing *et al.*, 2014). As template for the

625 sgRNA cassette (including one sgRNA backbone, one U6-26 terminator and one U6-  
626 29 promoter), pCBC DT1T2 was used and the generated PCR-product was cloned  
627 into pHEE401E via BsaI restriction sites, between a U6-26 promoter on one side and  
628 a second sgRNA backbone and a U6-29 terminator on the other side (as described  
629 previously (Xing *et al.*, 2014; Wang *et al.*, 2015). This way, a CRISPR/Cas9 construct  
630 containing two sgRNAs under two U6 promoters and a Cas9 under the egg-cell  
631 specific EC1.2 promoter was obtained. To knock out one gene, two different sgRNAs  
632 were targeted at it, aiming at deleting the whole gene stretch between the target  
633 sequences. This made it possible to screen for mutant plants via PCR. For this,  
634 gDNA was extracted from rosette leaves, the area of interest was amplified via  
635 REDTaq®-PCR and screened for the desired smaller PCR-products that indicated a  
636 deletion. Homozygous mutants were obtained in the T2 and T1 generation for SLDP1  
637 and SLDP2, respectively. To remove the Cas9-transgene, homozygous mutants  
638 were backcrossed to WT plants (and Cas9-loss was confirmed by PCR with U6- and  
639 Hygromycin resistance gene-specific primers).

640 For *SLDP1*, a mutant line with deletion of bases 333-564 in the first exon  
641 (resulting in a frameshift and a premature stop codon at position 650-652 for  
642 AT1G65090.1 and .2 or at position 686-688 for AT1G65090.3, producing a potential  
643 139 amino acid protein for AT1G65090.1 and .2 or 152 amino acids for  
644 AT1G65090.3) was obtained and called *slp1-2*. For *SLDP2*, a mutant line with  
645 deletion of bases 304-379 in the first exon (resulting in frameshift and premature stop  
646 codon at position 398-400, producing a potential 107 amino acid protein) was  
647 obtained and called *slp2-2*. For *LIPA* a mutant line with deletion of bases  $\Delta$ 94-214  
648 (resulting in a frameshift and premature stop codon at position 230-232 and a  
649 potential 36 amino acid protein) was obtained and called *lipa-2*. Sequence

650 alignments and predicted protein products of all analysed mutant lines are shown in  
651 Supplemental Data S1.

652

### 653 **RNA isolation and qPCR**

654 RNA from was isolated in triplicate from 5 mg of dry seeds using an RNA extraction  
655 kit (Monarch Total RNA Miniprep Kit, NEB). cDNA synthesis was performed with  
656 900 ng total RNA and 100 pmol oligo(dT) primer using the Maxima Reverse  
657 Transcriptase (Thermo Scientific) according to the manufacturer's instructions.  
658 Transcript analysis by qPCR was carried out with AT4G05320 (*POLYUBIQUITIN 10*)  
659 as reference (Czechowski *et al.*, 2005). Amplification and quantification were  
660 performed with the Takyon™ No Rox SYBR® MasterMix dTTP Blue Kit (Eurogentec)  
661 in the iCycler System (iQ™5 Real-Time PCR Detection System, Bio-Rad). The  
662 amplification mix contained 1x Takyon™ No Rox SYBR® MasterMix dTTP Blue, 2  
663 mM primers and 4 µl cDNA in a final reaction volume of 20 µl. The PCR program  
664 consisted of a 3 min denaturation step at 95°C followed by 40 cycles of 10 s at 95°C,  
665 20 s at 58°C, and 40 s at 72°C.

666 Data analysis was performed using the  $2^{-\Delta\Delta CT}$  method as previously described  
667 (Livak and Schmittgen, 2001).

668

### 669 **Plasmid construction**

670 For localisation studies in pollen tubes, coding sequences of the genes of interest  
671 were cloned into pLatMVC-GW, pLatMVN-GW or pLatMCC-GW (Müller *et al.*, 2017)  
672 via classical or fast Gateway® (Thermo Fisher Scientific) cloning as described before  
673 (Müller *et al.*, 2017). All pLat-constructs contain a LAT52 promoter for strong  
674 expression in pollen tubes (Twell *et al.*, 1991) and were verified by sequencing. A list  
675 of plasmids and primers can be found in Supplemental table S1.

676 For localisation studies in *N. benthamiana* leaves and Arabidopsis seedlings,  
677 cloning of pMDC32-ChC/SLDP2, encoding SLDP2 appended at its C-terminus to the  
678 red fluorescent protein mCherry (SLDP2-mCherry), pMDC32-CGFP/LIPA, encoding  
679 LIPA appended at its C-terminus to a monomerised version of GFP (LIPA-mGFP),  
680 and pMDC43/LIPA, encoding LIPA appended at its N-terminus to GFP (GFP-LIPA),  
681 was performed using Gateway cloning technology (Müller *et al.*, 2017) and the binary  
682 vectors pMDC32-ChC (Kretzschmar *et al.*, 2020), pMDC43 (Curtis and Grossniklaus,  
683 2003), and pMDC32-CGFP (described below), respectively. Each binary vector  
684 contains the 35S cauliflower mosaic virus promoter and was verified by automated  
685 sequencing performed at the University of Guelph Genomics Facility.

686 The pMDC32-CGFP binary vector contains a Gateway recombination site  
687 followed by the full-length mGFP open reading frame, which provides for the  
688 expression of a fusion protein with a C-terminal-appended mGFP. To construct  
689 pMDC32-CGFP, the mGFP coding sequence was amplified from pRTL2/monoGFP-  
690 MCS (Shockey *et al.*, 2006), using primers GFP-FP-*PacI* (5'-  
691 CCGGCCTTAATTAATAATGAGTAAAGGAGAAGAAGAACTTTT-3') and GFP-RP-*SacI* (5'-  
692 CCGGCCGAGCTCTTATTTGTATAGTTCATCCATGCC-3'), which also added 5' *PacI*  
693 and 3' *SacI* restriction sites. The resulting PCR products were digested with *PacI* and  
694 *SacI* and ligated into similarly-digested pMDC32-ChC to yield pMDC32-CGFP.

695 For yeast two-hybrid (Y2H) assays, full-length *SLDP1.3*, *SLDP2.1*, and *LIPA*  
696 open reading frames, as well as modified versions of the latter, were amplified from  
697 the appropriate template plasmids using PCR and primers containing the *EcoRI* and  
698 *BamHI* restriction digest sites at the 5' and 3' ends, respectively. Resulting PCR  
699 amplicons were then digested with *EcoRI* and *BamHI* and ligated into similarly-  
700 digested pGBKT7 or pGADT7, which contain the GAL4-binding domain and GAL4-  
701 activation domain, respectively (Takara Bio Inc.).

702

## 703 **Particle bombardment and pollen tube microscopy**

704 *N. tabacum* pollen tubes were transiently transformed using a gene gun. For this, 6  
705 µg of construct DNA was coated onto approx. 0.9 mg gold particles (1 µm), shot onto  
706 freshly harvested *N. tabacum* pollen of 5 flowers per transformation. Pollen tubes  
707 were grown for 5-7 h (8-10 h for LD motility assays) in liquid pollen tube medium on a  
708 microscope slide in a humid environment (in detail methods on coating and  
709 transformation were described before (Müller *et al.*, 2017). For co-transformation, 6  
710 µg DNA of each construct were pre-mixed and then coated onto the gold particles.

711 For pollen tube microscopy, pollen tubes were fixed in a final concentration of  
712 1.8 % (v/v) formaldehyde in pollen tube medium (Read *et al.*, 1993) (5 % w/v  
713 sucrose, 12.5 % w/v PEG-4000, 15 mM MES-KOH pH 5.9, 1 mM CaCl<sub>2</sub>, 1 mM KCl,  
714 0.8 mM MgSO<sub>4</sub>, 0.01 % H<sub>3</sub>BO<sub>3</sub> v/v, 30 µM CuSO<sub>4</sub>) and LDs were stained with a  
715 final concentration of 0.25 µg ml<sup>-1</sup> Nile red (Sigma-Aldrich, St. Louis, Missouri, USA)  
716 or 0.5 % Lipi-Blue (Dojindo Molecular Technologies, Rockville, MD, US), as  
717 indicated. Pollen tubes prepared to monitor LD movements were stained in the same  
718 manner but no fixative was added. Micrographs were acquired as single z-sections  
719 using a Zeiss LSM 510 or a Zeiss LSM780 confocal microscope (Carl Zeiss). For  
720 excitation, 405 nm Diode was used, Lipi-Blue fluorescence was detected from 443 –  
721 475 nm, Nile red was excited with 488 nm and detected at 583-667 nm. Constructs  
722 with mCherry were excited with 561 nm and detected at 571 – 614 nm, mVenus was  
723 excited with 488 nm and detected at 518 – 550 nm or 497-533 nm when co-imaged  
724 with Nile red. HFT 405/ 514/633-nm major beam splitter (MBS) was used.

725

## 726 **CLSM-based FLIM-FRET Analysis**

727 Confocal microscopy was performed using a Leica TCS SP8 microscope equipped  
728 with the FALCON time-correlated single photon counting system. For fluorescence-  
729 lifetime imaging of transiently transformed *N. tabacum* pollen tubes, images were  
730 taken with a 20x/ 0.75 objective (CS2, HC PL APO). The mVenus-tagged donor  
731 proteins and mCherry/LIPA-mCherry acceptors were excited using a pulsed white  
732 light laser operating at 514 nm or 561 nm, respectively, with a pulse rate of 40 kHz in  
733 a two channel sequential excitation mode. Fluorescence emission was detected at  
734 525-560 nm for mVenus and 580-630 nm for mCherry using Leica HyD SMD  
735 detectors. Images were acquired until at least 100 photons per pixel were collected in  
736 the brightest channel. The format of the pictures is 512 x 512 pixels. The ROI (region  
737 of interest) selection and FLIM data fitting were performed using the LASX Single  
738 Molecule Detection software module (v3.5.5). A monoexponential reconvolution  
739 model was fitted to all decay curves for calculating the fluorescence lifetime. Donor  
740 lifetime data were exported and used for further statistical analysis and plotting in  
741 Origin 2020 (OriginLab Corp., Northampton, MA, USA).

742

### 743 **Yeast two-hybrid**

744 Directed yeast two-hybrid assays were performed according to Richardson *et al.*  
745 (2011). In brief, both bait (pGBKT7) and prey (pGADT7) vectors were co-transformed  
746 into yeast (strain PJ69-4A) using the lithium acetate transformation method (Gietz  
747 and Schiestl, 2007) and then plated on double-drop out (DDO) selection plates,  
748 consisting of synthetic dextrose (SD) media containing 2% dextrose, 0.67% yeast  
749 nitrogen base, and synthetic complete amino acid and base supplements lacking Leu  
750 and Trp (Bufferad Inc.). Selected yeast colonies were grown to log phase in liquid  
751 DDO at 30 °C and 275 rpm, then the OD<sub>600</sub> was adjusted to 0.5 and 1:5 serial  
752 dilutions were carried out. 5 µl of each dilution was spotted onto both DDO and

753 quadruple drop-out (QDO) (SD medium lacking Leu, Trp, Ade, and His) plates and  
754 grown at 30 °C for 3 days. Results shown are representative of three independent  
755 yeast transformations.

756

### 757 ***N. benthamiana* infiltration and microscopy**

758 For infiltration, leaves of 4-week-old *N. benthamiana* plants were (co)infiltrated with  
759 *Agrobacterium tumefaciens* (strain LBA4404) harbouring a selected binary vector, as  
760 described previously (Kretzschmar *et al.*, 2020). All (co)infiltrations also included *A.*  
761 *tumefaciens* transformed with pORE04-35S::P19, which encodes the tomato bushy  
762 stunt virus gene *P19* to enhance transgene expression (Petrie *et al.*, 2010).

763 (Co)infiltrated *N. benthamiana* leaves were prepared for confocal laser scanning  
764 microscopy (CLSM) by first fixing with 4% (w/v) formaldehyde, washing with 50 mM  
765 PIPES pH 7.0, and then staining with neutral lipid-specific dye monodansylpentane  
766 (MDH) (Abcepta) (Yang *et al.*, 2012) at a working concentration of 0.4 mM, as  
767 described previously (Gidda *et al.*, 2016). Micrographs of leaf epidermal cells were  
768 acquired as single z-sections using a Leica SP5 CLSM (Leica Microsystems) with the  
769 same excitation and emission parameters for mCherry, GFP, and MDH as reported  
770 previously (Gidda *et al.*, 2016). All images of cells are representative of at least two  
771 independent experiments (i.e., infiltrations), including at least three separate  
772 (co)transformation of leaf epidermal cells.

773

### 774 **Determination of 1000 seed weight and seed total fatty acid analysis**

775 1000 seed weight was determined by manually counting replicates of 500 seeds and  
776 weighing these.

777 For fatty acid analysis, seeds were sieved to a size of 250 – 300 µm. Six biological  
778 replicates were performed: seeds from six different mother plants were harvested

779 and 25 seeds each were analysed per time point and genotype, presented results  
780 are representative of two other replications of the experiment. Seeds were  
781 germinated on wet filter papers soaked in 1.6 ml H<sub>2</sub>O and put in a petri dish in a  
782 humid environment. Apart from seeds for dry seed analysis, seeds were stratified for  
783 4 days at 4 °C in the dark prior to imbibition. After 4 days of stratification, 0 day  
784 samples were harvested; the other samples were placed into 16-h/8-h day/night cycle  
785 in a incubator (CU-36L/D, Percival Scientific Inc., Perry, USA) at 22 °C and a light  
786 intensity of 120 μmol m<sup>-2</sup> s<sup>-1</sup>. Seeds and seedlings were harvested into 1 ml fatty acid  
787 methyl ester (FAME) reagent (2.5 % v/v H<sub>2</sub>SO<sub>4</sub>, 2 % v/v dimethoxypropane in  
788 methanol/toluol 2:1, v/v) (Miquel and Browse, 1992) with 30 μl of 0.33 mg/ml tri-15:0  
789 TAG (1,2,3-tripentadecanoylglycerol ≥99%, Sigma-Aldrich, St. Louis, Missouri, USA)  
790 in toluol (ROTIPURAN® ≥ 99.5 %, Carl Roth, Karlsruhe, Deutschland) as internal  
791 standard and ground with a glass stick. Samples were then incubated at 80 °C in a  
792 water bath under constant shaking for one hour to esterify all FAs to methanol. The  
793 reaction was stopped with 1 ml of saturated NaCl-solution and vortexing. FAMES  
794 were then extracted twice adding 1 ml of hexane, centrifuging 10 min at 2,000 x g  
795 and transferring the upper phase to a new glass tube. Hexane was evaporated and  
796 samples resuspended in 30 μl of acetonitrile (HPLC Gradient grade, Fisher  
797 Chemical, Thermo Fisher Scientific, Waltham, Massachusetts, USA). Subsequent  
798 GC-FID analysis was performed as described in (Hornung *et al.*, 2002). An Agilent  
799 GC 6890 system (Agilent, Waldbronn, Germany) coupled to an FID detector  
800 equipped with a capillary HP INNOWAX column (30 m × 0.32 mm, 0.5 μm coating  
801 thickness, Agilent, Waldbronn, Germany) was used, Helium served as carrier gas (30  
802 cm × s<sup>-1</sup>), with an injector temperature of 220 °C. The temperature gradient was 150  
803 °C for 1 min, 150–200 °C at 15 °C min<sup>-1</sup>, 200–250 °C at 2 °C min<sup>-1</sup>, and 250 °C for  
804 10 min. For quantification, peak integrals were determined using Agilent ChemStation



805 for LC 3D systems (Rev. B.04.03) and used to calculate absolute amounts total fatty  
806 acids.

807

### 808 **Hypocotyl measurements**

809 All seeds used for hypocotyl analyses were sieved to a size of 250 – 300 µm prior to  
810 analyses and surface-sterilised in 6 % sodium hypochlorite solution for 15 – 20  
811 minutes and placed on solid half-strength MS medium without sucrose (Murashige  
812 and Skoog, 1962). After a stratification for 4 days at 4 °C in the dark, seedlings were  
813 grown vertically in the light for 7 days under 16-h/8-h day/night regime or 4 h in the  
814 light and then 7 days in the dark in an incubator (CU-36L/D, Percival Scientific Inc.,  
815 Perry, USA) at 22 °C and a light intensity of 120 µmol m<sup>-2</sup> s<sup>-1</sup>, and hypocotyls were  
816 recorded with the Ocular scientific image acquisition software (version 1.0, Digital  
817 Optics Ltd, Auckland, New Zealand) on a binocular (Olympus SZX12 binocular,  
818 Olympus Corporation, Tokyo, Japan) attached to a camera (R6 Retiga camera,  
819 QImaging, Surrey, Canada). Hypocotyl length was measured with ImageJ software  
820 (1.52p) (Rueden *et al.*, 2017) and violin plots with mean points were generated using  
821 ggplot2 package (version 3.3.2) in the R environment (version 4.0.1).

822

### 823 **Seed and seedling preparation and microscopy**

824 For time-course microscopic analyses, either seeds rehydrated for 30 min were used,  
825 or seedlings were stratified and grown on half-strength MS-medium without sucrose  
826 as described above. They were transferred to light at 07.30 am (light period 7 am –  
827 11 pm, 16-h/8-h day/night cycle) and then analysed after 12, 24, 36 and 48 h of  
828 germination. Rehydrated seeds and seedlings were harvested into 1 ml H<sub>2</sub>O and  
829 directly used for microscopy after removal of seed coats. Fluorescence dyes were  
830 used at the following concentrations 1.5-6 µM Nile Red (Sigma Aldrich), 1.6 µM

831 Bodipy 493/503, 1  $\mu$ M MDY-64, or 4  $\mu$ M FM4-64 (Sigma Aldrich). All stock solutions  
832 were prepared in DMSO. Seeds were additionally fixated in 1 % formaldehyde, when  
833 Z-stacks were recorded. Micrographs were taken using a Zeiss LSM780 confocal  
834 microscope (Carl Zeiss). For Nile Red excitation, 561 nm laser was used,  
835 fluorescence was detected at 571-603 nm with a 488/561 MBS. For microscopy of  
836 MDY-64 and Nile Red, laser wavelengths of 458 and 561 nm, respectively, and a  
837 458/561 nm MBS were used, and fluorescence was detected at 463-516 and 552-  
838 631 nm, respectively. Bodipy 493/503 and mCherry were excited with a 488 and a  
839 561 nm laser using a 488/561 MBS and detected at range of 493-568 and 586-639,  
840 respectively. eGFP and Nile Red or FM4-64 were co-excited with a 488 nm laser and  
841 a 488 MBS. Fluorescence was detected at 489-515 and 563-631 nm for eGFP and  
842 Nile Red, respectively, and 493-530 and 651-739 nm for eGFP and FM4-64,  
843 respectively.

844

#### 845 **Proteomic analysis**

846 *Arabidopsis thaliana* seedlings were surface-sterilised, placed on half-strength MS-  
847 medium without sucrose, stratified for 72 h at 4 °C in the dark and then grown at  
848 22°C under 16 h/ 8 h of light-dark regime for 38 h.

849 Total protein isolation of total extract (TE) and LD fractions, LD-enrichment,  
850 proteomics sample preparation including a tryptic in-gel digest, LC/MS analysis and  
851 analysis of MS/MS2 raw data was performed as previously described (Kretzschmar  
852 *et al.*, 2018).

853 LFQ values were determined using MaxQuant software 1.6.2.10 (Cox and  
854 Mann, 2008; Cox *et al.*, 2014). Perseus software (Tyanova *et al.*, 2016) (version  
855 1.6.6.2) was used for data analysis. PCA plots were created from unfiltered raw LFQ  
856 values (Supplemental Dataset S2). The libraries, the meta data file, raw data files,

857 MaxQuant search files as well as ProteinGroup and Peptide search results created  
858 by MaxQuant are available on ProteomeXchange/PRIDE (Vizcaíno *et al.*, 2014)  
859 under the identifier PXD022769.

860 LFQ values were normalised as ‰ of total sum of all LFQs per replicate and  
861 log<sub>2</sub>-transformed (rLFQ) for further analyses. For LD-enrichment analysis within one  
862 line, all proteins from TE and LD fractions together were filtered for those detected at  
863 least three times in at least one group and identified by at least two peptides  
864 (Supplemental Dataset S3).

865 For differential abundance analysis of LD or TE fractions between the lines, LD  
866 fraction and TE fraction were analysed separately and filtering was performed  
867 independently of the respective other fraction (Supplemental Dataset S4).

868 For enrichment and differential abundance analyses, rLFQ-values were  
869 imputed: missing values were replaced from normal distribution (for total extract:  
870 width 0.3, down shift 1.8; for LD fractions: width 0.5, down shift 1.8; for both fractions  
871 together: width 0.8, down shift 1.8; Supplemental Dataset S5. To obtain proteins  
872 significantly enriched on LDs, LD fractions were compared to TE fractions and  
873 analysed for proteins enriched in LD fractions. To find differentially abundant proteins  
874 between the different lines, LD fractions of mutants were compared to LD fractions of  
875 the wild type, the same was done for TE fractions. Proteins were considered LD-  
876 enriched or differentially abundant, respectively, if FDR < 0.01 and S0 > 2 (as  
877 determined by two-sided t-test with 250 randomisations). Volcano plots were created  
878 to visualise the results.

879

## 880 **Electron microscopy**

881 High pressure freezing electron microscopic analysis was performed as described  
882 before (Hillmer *et al.*, 2012). Plant material was dissected from hypocotyls or

883 cotyledons of 36 – 48 h germinated seedlings with a biopsy punch (pfm medical,  
884 Köln; 2mm diameter), submerged in freezing medium (200 mM Suc, 10 mM  
885 trehalose, and 10 mM Tris buffer, pH 6.6) transferred into planchettes (Wohlwend,  
886 Sennwald, Switzerland; type 241 and 242), and frozen in a high-pressure freezer  
887 (HPM010; Bal-Tec, Liechtenstein). Freeze substitution was performed in a Leica EM  
888 AFS2 freeze substitution unit in dry acetone supplemented with 0.3% uranyl acetate  
889 at –85°C for 16 h before gradually warming up to –50 °C over a 5-h period. After  
890 washing with 100% ethanol for 60 min, samples were stepwise infiltrated  
891 (intermediate steps of 30%, 60% HM20 in ethanol, and twice with 100% HM20 for 1h  
892 each), embedded in Lowicryl HM20 at –50 °C and polymerised for 3 d with UV light in  
893 the freeze substitution apparatus at -35 °C. Ultrathin sections were cut on a Leica  
894 Ultracut S and poststained with 3 % aqueous uranyl acetate and lead citrate for 3 min  
895 each. Micrographs were taken at a Jeol JEM1400 TEM (Jeol Germany, Freising)  
896 equipped with a TVIPS TEMCAM F416 digital camera (TVIPS, Gauting) using  
897 EMMenue 4 (TVIPS, Gauting).

898

## 899 **Bioinformatics**

900 For sequence alignments, T-Coffee (Notredame *et al.*, 2000)  
901 (<http://tcoffee.org.cat/apps/tcoffee/do:regular>) was used with default settings.  
902 Sequence identity was calculated by Needleman-Wunsch global alignment of two  
903 sequences (Needleman and Wunsch, 1970) with EMBOSS needle on default settings  
904 (<https://www.bioinformatics.nl/cgi-bin/emboss/needle>). Helical wheel plots were  
905 created by Heliquest (Gautier *et al.*, 2008) ([https://heliquest.ipmc.cnrs.fr/cgi-](https://heliquest.ipmc.cnrs.fr/cgi-bin/ComputParams.py)  
906 [bin/ComputParams.py](https://heliquest.ipmc.cnrs.fr/cgi-bin/ComputParams.py)) with Helix type: alpha and window size: 1\_TURN. For  
907 hydrophobicity plots, ExPASy ProtScale (<https://web.expasy.org/protscale/>) was used  
908 with a Kyte&Doolittle scale (Kyte and Doolittle, 1982) and a window size of 9. Charge

909 plots were created by EMBOSS explorer charge ([http://www.bioinformatics.nl/cgi-](http://www.bioinformatics.nl/cgi-bin/emboss/charge?_pref_hide_optional=0)  
910 [bin/emboss/charge?\\_pref\\_hide\\_optional=0](http://www.bioinformatics.nl/cgi-bin/emboss/charge?_pref_hide_optional=0)) with a window length of 5. TMDprediction  
911 was performed with ExPASy TMpred ([https://embnet.vital-](https://embnet.vital-it.ch/software/TMPRED_form.html)  
912 [it.ch/software/TMPRED\\_form.html](https://embnet.vital-it.ch/software/TMPRED_form.html)). Coiled-coils were predicted by ExPASy COILS  
913 (Lupas *et al.*, 1991) ([https://embnet.vital-it.ch/software/COILS\\_form.html](https://embnet.vital-it.ch/software/COILS_form.html)) with a  
914 window width of 21.

915

## 916 **Structure bioinformatics and modelling**

917 Structure of LIPA (Uniprot code Q3EDG6) was downloaded from the AlphaFold2  
918 structure database (Varadi *et al.*, 2022). To calculate the structure of LIPA L80P,  
919 V98P, ColabFold with MMseq2 homology search was used (Mirdita *et al.*, 2021,  
920 Preprint). Electrostatic potential was calculated using the APBS server (Jurrus *et al.*,  
921 2018).

922 The structure of LIPA was mapped into the Martini coarse-grain representation using  
923 the martinize2 script with the ScFix modification (Souza *et al.*, 2021). The  
924 phospholipid bilayer, in total composed of 2042 phospholipid molecules, containing  
925 palmitoyl-oleoyl-phosphatidylcholine:palmitoyl-oleoyl-  
926 phosphatidylethanolamine:palmitoyl-oleoyl-phosphatidylserine:palmitoyl-oleoyl-  
927 phosphatidic acid:palmitoyl-oleoyl-phosphatidylinositol 4-phosphate:palmitoyl-oleoyl-  
928 phosphatidylinositol 4,5-bisphosphate (molecular ratio 37:37:10:10:5:1) was  
929 generated using the insane.py script (Wassenaar *et al.*, 2015). MD simulations were  
930 performed with Gromacs2018 (Abraham *et al.*, 2015). Lennard-Jones and  
931 electrostatic interactions were cut off at 1.1 nm, with the potentials shifted to zero at  
932 the cutoff. A relative dielectric constant of 15 was used. The neighbour list was  
933 updated every 20 steps using the Verlet neighbour search algorithm. Simulations  
934 were run in the NPT ensemble. During the production runs, the system was subject

935 to pressure scaling to 1 bar using Parrinello-Rahman barostat with temperature  
936 scaling to 283 K using the velocity-rescaling method with coupling times of 1.0 and  
937 12.0 ps. Semi-isotropic pressure coupling with a compressibility of  $3 \cdot 10^{-4} \text{ bar}^{-1}$  was  
938 employed. Initially, the protein was placed approximately 3.0 nm away from the  
939 membrane. Subsequently, the standard MARTINI water together with  $\text{Na}^+$  and  $\text{Cl}^-$   
940 ions at the concentration of 150 mM were added. Next, additional  $\text{Na}^+$  ions were  
941 added to ensure the electroneutrality of the system. The whole system was energy-  
942 minimized using the steepest descent method up to the maximum of 5000 steps and  
943 equilibrated for 10 ns with the pressure controlled by the Berendsen barostat.  
944 Production runs were performed for up to 1  $\mu\text{s}$  with a time step of 20 fs. Membrane  
945 binding events were analyzed by monitoring the minimum distance between the  
946 protein and the membrane using the gmx mindist tool in Gromacs. Membrane  
947 binding was subsequently evaluated by computing the probability density  
948 distributions using the kernel density estimation method (Srinivasan *et al.*, 2021).  
949 Visualization was done using the ChimeraX and VMD program (Humphrey *et al.*,  
950 1996).

951

## 952 **Accession Numbers**

953 Sequence data from this article can be found in the GenBank/EMBL data libraries  
954 under the following accession numbers: AT1G65090 (SLDP1); AT5G36100 (SLDP2);  
955 AT1G07985 (LIPA).

956

## 957 **Supplemental Information**

958 **Supplemental Table S1:** Overview of primers

959 **Supplementary Figure 1:** Alignment of Arabidopsis SLDP1 and SLDP2 protein  
960 isoforms

- 961 **Supplementary Figure 2:** Charge plots of SLDP
- 962 **Supplementary Figure 3:** qPCR analysis of SLDP splice variants
- 963 **Supplementary Figure 4:** qPCR analysis of SLDP mutant lines
- 964 **Supplementary Figure 5:** Images of *sldp* mutants.
- 965 **Supplementary Figure 6:** Time-course analysis of SLDP and LIPA mutant line LDs  
966 in hypocotyls
- 967 **Supplementary Figure 7:** Analysis of storage vacuoles
- 968 **Supplementary Figure 8:** Time-course analysis of SLDP and LIPA mutant line LDs  
969 in hypocotyls
- 970 **Supplementary Figure 9:** Transmission electron microscopy of seedlings
- 971 **Supplementary Figure 10:** Proteomic Analyses of *sldp* mutants.
- 972 **Supplementary Figure 11:** In silico analysis of LIPA
- 973 **Supplementary Figure 12:** Localisation analysis of LIPA in leaves.
- 974 **Supplementary Figure 13:** Co-expression analysis of SLDP and LIPA in tobacco  
975 pollen tubes.
- 976 **Supplementary Figure 14:** Coiled-coil mutants of LIPA
- 977 **Supplementary Figure 15:** Y2H assays to test for SLDP and LIPA self-interaction
- 978 **Supplementary Figure 16:** Analysis of the molecular dynamics simulations
- 979 **Supplementary Figure 17:** qPCR analysis of LIPA mutant lines
- 980 **Supplemental Data S1:** Sequence information.
- 981 **Supplemental Data S2:** Raw LFQs from proteomic analyses of LD-enriched and  
982 total extract fractions of wild-type and *sldp* mutant seedlings.
- 983 **Supplemental Data S3:** Normalised and filtered LFQs from proteomic analyses of  
984 LD-enriched and total extract fractions of wild-type and *sldp* mutant seedlings.
- 985 **Supplemental Data S4:** Imputed rLFQs from proteomic analyses of LD-enriched and  
986 total extract fractions of wild-type and *sldp* mutant seedlings.

987 **Supplemental Data S5:** List of LD-enriched proteins in wild-type and *sl dp* mutant

988 seedlings.

989 **Supplemental Data S6** Proteomic metadata table.

990 **Supplemental Movie S1:** LD movement in pollen tubes expressing mVenus.

991 **Supplemental Movie S2:** LD movement in pollen tubes expressing mVenus-LIPA.

992 **Supplemental Movie S3:** LD movement in pollen tubes expressing SLDP2.1-

993 mVenus.

994 **Supplemental Movie S4:** LD movement in pollen tubes co-expressing mVenus-LIPA

995 and SLDP2.1-mVenus.

996 **Supplemental Movie S5:** LD movement in pollen tubes expressing SLDP1.3-

997 mVenus.

998 **Supplemental Movie S6:** LD movement in pollen tubes co-expressing mVenus-LIPA

999 and SLDP1.3-mVenus.

1000 **Supplemental Movie S7:** LD movement in pollen tubes co-expressing untagged

1001 LIPA and SLDP2.1.

1002 **Supplemental Movie S8:** LD movement in pollen tubes co- expressing untagged

1003 LIPA and SLDP1.3

1004 **Supplemental Movie S9:** Simulation of LIPA membrane interaction

1005

1006 **Figure Legends**

1007

1008 **Figure 1. Arabidopsis has two SLDP isoforms that both localise to LDs**

1009 **A** Amino acid sequence alignment of SLDP1.3 and SLDP2.1, as generated by T-

1010 Coffee. Identical and similar amino acids in SLDP1.3 and SLDP2.1 are shaded black

1011 and grey, respectively. Hydrophobic/uncharged regions, as predicted by ExpASy

1012 ProtScale, are underlined and potential amphipathic  $\alpha$ -helices, as predicted by



1013 Heliquet, are boxed. See Supplemental Figure 1 for the protein sequence alignment  
1014 of five splice variants of Arabidopsis SLDP1 and SLDP2.

1015 **B** CLSM images of transiently-expressed full-length and truncated versions of  
1016 SLDP1.3 and SLDP2.1 appended to mVenus in transiently-transformed *N. tabacum*  
1017 pollen tubes. Truncated fusion constructs either included sequences predicted to  
1018 form an amphipathic  $\alpha$ -helix and hydrophobic sequences in SLDP1.3 and SLDP2.1  
1019 (i.e., SLDP1.3<sup>19-81</sup> and SLDP2.1<sup>13-75</sup>) or were devoid of these sequences (i.e.,  
1020 SLDP1.3 <sup>$\Delta$ 1-81</sup> and SLDP2.1 <sup>$\Delta$ 1-75</sup>); refer also to (A). LDs were stained with Nile red.  
1021 Images are representative of at least 10 micrographs of transformed pollen tubes per  
1022 fusion construct. In the merge images, fluorescence attributable to mVenus-tagged  
1023 SLDP proteins and corresponding Nile red stained LDs are false-colored magenta  
1024 and green, respectively; white colour represents co-localisation. Bars, 10  $\mu$ m.

1025 **C** Helical wheel projection of the N-terminal regions of SLDP1.3 (amino acid residues  
1026 13-30) and SLDP2.1 (amino acid residues 16-39) predicted by Heliquet to form an  
1027 amphipathic  $\alpha$ -helix. Hydrophobic amino acid residues are coloured yellow,  
1028 hydrophilic and charged residues are magenta and blue respectively. The direction of  
1029 the arrow in the helical wheel indicates the position of the hydrophobic face along the  
1030 axis of the helix.

1031 **D** Protein hydropathy profiles of the deduced amino acid sequences of SLDP1.3 and  
1032 SLDP2.1 based on ProtScale. Note the relatively strong hydrophobic sequence in the  
1033 N-terminal region of each protein.

1034

1035 **Figure 2. Time-course analysis of LDs in *sldp* mutant Arabidopsis seeds and**  
1036 **seedlings**

1037 **A** Illustration depicting the Arabidopsis SLDP1.3 and SLDP2.1 genes based on  
1038 information provided at TAIR. Indicated are the relative positions of the 5' and 3'

1039 untranslated regions (grey boxes), exons (black boxes), introns (black line), T-DNA  
1040 insertion sites (triangle, arrow indicating direction of T-DNA), and the regions deleted  
1041 with CRISPR/Cas9-based genome editing (red lines).

1042 **B** CLSM images of rehydrated seeds and seedling cotyledon cells from WT and  
1043 various *sldp1* and *sldp2* mutant Arabidopsis lines. Seeds were rehydrated for 1 h or  
1044 stratified for 4 days at 4 °C in the dark. LDs were stained with Nile red after  
1045 rehydration, or 12, 24, 36 and 48 h ( $\pm$  2 h) after stratification. Arrowheads indicate  
1046 obvious examples of LD clusters in *sldp2* single and *sldp1 sldp2* double mutant  
1047 seedling. Images are single plane images from the middle of the cell (similar planes  
1048 were chosen for all images). Images are representative of at least five micrographs of  
1049 seeds and seedlings for each plant line and time point. Bar, 10  $\mu$ m, applies to all  
1050 images in the panels.

1051

1052

1053

1054

### 1055 **Figure 3. Proteomic analysis of *sldp* mutants**

1056 Proteins were isolated from germinating seedlings 36 h after stratification. Proteins  
1057 from LD-enriched fractions and total protein fractions were analysed by LC-MS/MS  
1058 after a tryptic in-gel digest (n=3 biological replicates).

1059 **A** rLFQ values of SLDP1 and SLDP2 analysed in LD-enriched fractions of different  
1060 Arabidopsis lines (red cross = mean, lines = SD, n=3).

1061 **B** Volcano plot of imputed rLFQ values from LD fractions of the wild type versus  
1062 *sldp1-1 sldp2-1*. It displays proteins differentially accumulating in the double mutant.  
1063 Top left-hand corner proteins are significantly reduced in *sldp1-1 sldp2-1* LD

1064 fractions, top right-hand corner proteins are significantly reduced in wild-type LD

1065 fractions.

1066 **C** Volcano plots of imputed rLFQ values from TE versus LD fractions of wild-type and  
1067 *sldp1-1 sldp2-1* seedlings, to detect proteins enriched at LDs. Proteins in the top  
1068 right-hand corner are significantly enriched at LDs in the respective analysed line.  
1069 SLDP1 and LIPA are marked in black and known LD-proteins among the significantly  
1070 LD-enriched proteins are marked in green.

1071 **D** rLFQ values of LIPA analysed in LD- and TE-enriched fractions of different  
1072 Arabidopsis lines (red cross, mean; lines, SD; dots, individual data points; n=3).

1073

#### 1074 **Figure 4. Subcellular localisation of LIPA in tobacco pollen tubes**

1075 **A, B** CLSM images of LIPA-mVenus and mVenus-LIPA transiently-expressed alone  
1076 **(A)** or co-expressed **(B)** with SLDP2.1-mCherry in *N. tabacum* pollen tubes. LDs  
1077 were stained with Lipi-Blue. LIPA colocalises with LDs only in the presence of  
1078 SLDP2.1 (see arrowheads) but not when expressed alone. Images are  
1079 representative of at least 5 micrographs of transformed pollen tubes with the  
1080 indicated fusion construct(s). For merged images with two channels: magenta:  
1081 mVenus (LIPA); green: LDs. For merged images with three channels: red: mVenus  
1082 (LIPA), blue: mCherry (SLDP), green: LDs. Bars, 10  $\mu$ m.

1083 **C** Analysis of LDs in proximity to the PM. Lipi-Blue-stained LDs adjacent to the PM  
1084 (i.e., pLDs) in *N. tabacum* pollen tubes (refer to **A, B**) were counted manually and the  
1085 number of pLDs per  $\mu$ m was calculated for each indicated construct(s). Results are  
1086 presented as boxplots (displaying lower hinge = 25% quantile, median = 50%  
1087 quantile, upper hinge = 75% quantile, upper whisker = largest observation less than  
1088 or equal to upper hinge + 1.5 \* IQR, lower whisker = smallest observation greater  
1089 than or equal to lower hinge - 1.5 \* IQR). One-way ANOVA was performed, followed

1090 by Tukey post-hoc analysis ( $F(4,81) = 23.37$ ,  $p = 7.24e-13$ ,  $n =$  as indicated). Note  
1091 that only the SLDP2.1 + mVenus-LIPA co-bombardment increased the number of  
1092 pLDs compared to the single bombardment controls. Statistical results are presented  
1093 as compact letter display of all pair-wise comparisons.

1094

1095 **Figure 5. LD mobility analysis of LIPA and SLDP2.1 transformed tobacco pollen**  
1096 **tubes**

1097 CLSM images of mVenus-LIPA and SLDP2.1-mVenus transiently expressed either  
1098 alone or together in *N. tabacum* pollen tubes. Pollen tubes were stained with Nile red  
1099 and LD dynamics were recorded over the indicated time course. Images are  
1100 representative of time-course series of 5 transformed pollen tubes with each of the  
1101 indicated fusion construct(s). Note in mVenus-LIPA and SLDP2.1-mVenus-  
1102 transformed pollen tubes, LDs display dynamic cytoplasmic streaming, while in  
1103 mVenus-LIPA and SLDP2.1-mVenus co-transformed pollen tubes LDs were  
1104 predominantly immobilised at the PM. Bars, 10  $\mu$ m.

1105

1106

1107 **Figure 6. Analysis of the predicted  $\alpha$ -helical/coiled-coil domain in LIPA**

1108 **A** Predicted structure of LIPA (left). The mutation of the L80 and V98 in helix 3 (right)  
1109 to proline residues leads to a shortening of the helix (black arrow). Structures were  
1110 generated using the AlphaFold2 algorithm. The models are coloured by local model  
1111 confidence (pLDDT) as calculated by AlphaFold2. The pLDDT > 90 (dark purple)  
1112 indicates regions of high prediction accuracy of both backbone and side chains. The  
1113 pLDDT > 70 (white) indicates high-confidence backbone prediction. Regions in light  
1114 and dark green (pLDDT < 70) represent low confidence predictions.

1115 **B, C** CLSM images of mVenus-LIPA<sup>64-113</sup> and SLDP2.1-mCherry (**B**) and mVenus-  
1116 LIPA L<sup>80</sup>P V<sup>98</sup>P or LIPA L<sup>80</sup>P V<sup>98</sup>P-mVenus and SLDP2.1-mCherry (**C**) transiently-  
1117 expressed in *N. tabacum* pollen tubes. LDs were stained with Lipi-Blue. Images are  
1118 representative of at least 5 micrographs of transformed pollen tubes with the  
1119 indicated fusion construct(s). Note that mVenus-LIPA<sup>64-113</sup>, but not mVenus-LIPA-  
1120 L<sup>80</sup>P V<sup>98</sup>P or LIPA-L<sup>80</sup>P V<sup>98</sup>P-mVenus re-locate to LDs upon SLDP2.1-mCherry co-  
1121 expression. For merged images with two channels: magenta: mVenus (LIPA); green:  
1122 LDs. For merged images with three channels red: mVenus (LIPA), blue: mCherry  
1123 (SLDP), green: LDs. Bars, 10  $\mu$ m.

1124

#### 1125 **Figure 7. SLDP and LIPA interaction assays by FRET-FLIM and Y2H**

1126 **A** Full-length versions of SLDPs tagged with mVenus (mV) were expressed in  
1127 tobacco pollen tubes either alone or in combination with the cytosolic LIPA-mCherry  
1128 (LIPA-mC). Co-expression led to a recruitment of LIPA-mCherry to the LDs and a  
1129 significant reduction of the donor lifetime. Fig7A: One-way ANOVA was performed,  
1130 followed by Tukey post-hoc analysis (left panel:  $F(1,27) = 43.85$ ,  $p = 4.18e-07$ ,  
1131  $n_1=15$ ,  $n_2=14$ ; right panel:  $F(1,28) = 27.33$ ,  $p = 1.49e-05$ ,  $n = 15$ . Statistical results  
1132 are presented as compact letter display of all pair-wise comparisons.

1133 **B** The expression of truncated cytosolic versions of the SLDPs with cytosolic LIPA-  
1134 mCherry also led to a reduction of the donor lifetime in comparison to expression of  
1135 the SLDPs alone, or of the SLDPs in combination with mCherry. One-way ANOVA  
1136 was performed, followed by Tukey post-hoc analysis ( $F(5,114) = 94.57$ ,  $p = 6.68e-$   
1137  $39$ ,  $n=20$ ). Statistical results are presented as compact letter display of all pair-wise  
1138 comparisons.

1139 **C** Y2H interaction analysis of SLDP1, SLDP2 and LIPA. Yeast (*S. cerevisiae*) were  
1140 co-transformed with bait (pGBKT7) plasmids containing full-length SLDP1 or SLDP2

1141 and prey (pGADT7) plasmids containing LIPA or modified versions thereof, or with  
1142 the corresponding empty plasmids serving as negative controls. Serial dilutions of  
1143 transformed yeast cell cultures were then plated onto either plasmid-selection  
1144 conditions (double drop out medium, DDO), or higher stringency selection conditions  
1145 (quadruple drop out medium, QDO) where yeast cell growth requires a Y2H protein-  
1146 protein interaction. Note that only yeast cells co-expressing SLDP1 or SLDP2 and  
1147 LIPA or LIPA<sup>64-113</sup>, but not LIPA L<sup>80P</sup> V<sup>98P</sup>, grew on QDO plates. Results shown are  
1148 representative of three separate co-transformations of yeast with each plasmid  
1149 combination.

1150

### 1151 **Figure 8. PM-localisation of LIPA**

1152 **A** Electrostatic potential mapped onto the solvent-excluded surface of the LIPA  
1153 structure. Charge distribution indicates a strong accumulation of positively charged  
1154 residues in the C-terminal region, especially region 107-134.

1155 **B** Illustrations and CLSM images of full-length and various truncation versions of  
1156 LIPA appended to mVenus in transiently-transformed *N. tabacum* pollen tubes.  
1157 Images are representative micrographs of at least 10 transformed pollen tubes. Bars,  
1158 10  $\mu\text{m}$ .

1159 **C** Snapshots from the molecular dynamics (MD) simulations. Different time points are  
1160 indicated. The protein is shown in the ribbon representation (pink). Only phosphate  
1161 groups of the lipid bilayer are shown for the sake of clarity.

1162 **D** Probability density distribution of protein-membrane minimum distances shows a  
1163 significant portion of the bound protein to the lipid bilayer.

1164 **E** Mean number of contacts between protein and phosphate group of the lipid bilayer.  
1165 The contacts were defined as the number of phosphate groups within 0.8 nm of  
1166 protein atoms. The C-terminus displays the highest number of contacts, but helix H1

1167 and the adjacent linker also contribute to the interaction. The secondary structure is  
1168 indicated above the plot.

1169

### 1170 **Figure 9: Time-course analysis of LDs in cotyledons**

1171 **A** Schematic depiction of the LIPA gene with untranslated regions (grey boxes), one  
1172 exon (black box), T-DNA insertion site (triangle, arrow indicating direction of T-DNA)  
1173 and the region deleted by CRISPR/Cas9 genome editing (red line).

1174 **B** CLSM images of rehydrated seeds and seedling cotyledon cells from WT and *lipa*-  
1175 1 and *lipa*-2 mutant Arabidopsis lines. Seeds were rehydrated for 1 h or stratified for  
1176 4 days at 4 °C in the dark. LDs were stained with Nile red after rehydration, or 12, 24,  
1177 36 and 48 h ( $\pm$  2 h) after stratification. Arrowheads indicate obvious examples of LD  
1178 clusters in *lipa* mutant seedling. Images are single plane images from the middle of  
1179 the cell (similar planes were chosen for all images). Images are representative of at  
1180 least five micrographs of seeds and seedlings for each plant line and time point. Bar,  
1181 10  $\mu$ m and applies to all images in the panels.

1182

1183

### 1184 **Figure 10. Localisation of stably-expressed SLDP and LIPA in Arabidopsis** 1185 **seedling hypocotyls**

1186 SLDP1.3-mCherry and SLDP2.1-mCherry (**A, B**) or eGFP-LIPA (**C, D**) were stably-  
1187 expressed under the 35 S promoter in Arabidopsis Col-0 (**A, B**) or *lipa*-1 mutant (**C, D**)  
1188 plants. Fusion protein localisation was monitored in 38 h-old seedlings by CLSM  
1189 after staining with either BODIPY 493/503 (**A, B**), Nile Red (**C**), or FM4-64 (**D**). The  
1190 panels on the right display portions of the cells at higher magnification in the panels  
1191 to the right. Note that the fluorescence attributable to SLDP1.3-mCherry  
1192 predominantly encircled LDs (**A**), while for SLDP2.1-mCherry and eGFP-LIPA,

1193 fluorescence was enriched at putative LD-PM MCSs (**B-D**). Images are  
1194 representative of at least five seedlings from each of three (**A, B**) or two independent  
1195 plant lines (**C, D**). Bars, 10  $\mu\text{m}$  and 2  $\mu\text{m}$  in low and high magnified images,  
1196 respectively, and applies to all the corresponding images in the other panels.

1197

### 1198 **Figure 11. Model of SLDP-LIPA mediated PM-LD MCS**

1199 SLDP1 and SLDP2 associate with the surface of LDs via their N-terminal regions.  
1200 LIPA binds to the PM through a C-terminal region and interacts with SLDP1 and  
1201 SLDP2 via its coiled-coil region. The resulting SLDP1/2-LIPA interaction(s) tether the  
1202 LD to the PM.

1203

### 1204 **Acknowledgements**

1205 HEK, OV, KS, MW, GB and TI thank the German research foundation (DFG; Grants  
1206 IS 273/2-2, IS 273/7-1, IS 273/10-1, IRTG 2172 PRoTECT, BR1502-15-1 and INST  
1207 186/1230-1 FUGG to Stefanie Pöggeler, INST 186/1277-1 FUGG to Volker Lipka).  
1208 PS thanks the Studienstiftung des deutschen Volkes for funding. Research in RTM's  
1209 lab was supported by grants from the US Department of Energy, Office of Science,  
1210 BES-Physical Biosciences program (DE-SC0016536) and the Natural Sciences and  
1211 Engineering Research Council of Canada (RGPIN-2018-04629). NMD is a recipient  
1212 of an Ontario Graduate Scholarship. We would like to thank Julia Matz for help in the  
1213 lab, The department of Dr. Peter Rehling for granting access to their microscope and  
1214 Karen Linnemannstöns for helpful discussions.

1215

### 1216 **References**

1217 **Abraham, M.J., Murtola, T., Schulz, R., Páll, S., Smith, J.C., Hess, B., and**  
1218 **Lindahl, E. (2015). GROMACS: High performance molecular simulations**



- 1219 through multi-level parallelism from laptops to supercomputers. *SoftwareX* **1–2**:  
1220 19–25.
- 1221 **Akdel, M., Pires, D. E. V, Porta Pardo, E., Jänes, J., Zalevsky, A. O., Mészáros,**  
1222 **B., ... Beltrao, P.** (2021). A structural biology community assessment of  
1223 AlphaFold 2 applications. *BioRxiv* [Preprint], 2021.09.26.461876 [accessed 11  
1224 January 2022]. Available from: <https://doi.org/10.1101/2021.09.26.461876>.
- 1225 **Bae, S., Park, J., and Kim, J.S.** (2014). Cas-OFFinder: A fast and versatile algorithm  
1226 that searches for potential off-target sites of Cas9 RNA-guided endonucleases.  
1227 *Bioinformatics* **30**: 1473–1475.
- 1228 **Baillie, A.L., Falz, A.L., Müller-Schüssele, S.J., and Sparkes, I.** (2020). It Started  
1229 With a Kiss: Monitoring Organelle Interactions and Identifying Membrane  
1230 Contact Site Components in Plants. *Front. Plant Sci.* **11**: 517.
- 1231 **Berardini, T.Z., Reiser, L., Li, D., Mezheritsky, Y., Muller, R., Strait, E., and**  
1232 **Huala, E.** (2015). The arabidopsis information resource: Making and mining the  
1233 “gold standard” annotated reference plant genome. *Genesis* **53**: 474–485.
- 1234 **Bewley, J.** (1997). Seed Germination and Dormancy. *Plant Cell* **9**: 1055–1066.
- 1235 **Bohnert, M.** (2020). Tethering Fat: Tethers in Lipid Droplet Contact Sites. *Contact* **3**:  
1236 251525642090814.
- 1237 **Cai, Y., Goodman, J.M., Pyc, M., Mullen, R.T., Dyer, J.M., and Chapman, K.D.**  
1238 (2015). Arabidopsis SEIPIN Proteins Modulate Triacylglycerol Accumulation and  
1239 Influence Lipid Droplet Proliferation. *Plant Cell* **27**: 2616–2636.
- 1240 **Chang, D.K., Cheng, S.F., Trivedi, V.D., and Lin, K.L.** (1999). Proline affects  
1241 oligomerization of a coiled coil by inducing a kink in a long helix. *J. Struct. Biol.*  
1242 **128**: 270–279.
- 1243 **Cheng, H.Y., Schiavone, A.P., and Smithgall, T.E.** (2001). A Point Mutation in the  
1244 N-Terminal Coiled-Coil Domain Releases c-Fes Tyrosine Kinase Activity and

- 1245 Survival Signaling in Myeloid Leukemia Cells. *Mol. Cell. Biol.* **21**: 6170–6180.
- 1246 **Cheng, M.-C., Hsieh, E.-J., Chen, J.-H., Chen, H.-Y., and Lin, T.-P.** (2012).  
1247 *Arabidopsis* RGLG2, Functioning as a RING E3 Ligase, Interacts with AtERF53  
1248 and Negatively Regulates the Plant Drought Stress Response. *Plant Physiol.*  
1249 **158**: 363–375.
- 1250 **Cockcroft, S. and Raghu, P.** (2018). Phospholipid transport protein function at  
1251 organelle contact sites. *Curr. Opin. Cell Biol.* **53**: 52–60.
- 1252 **Corradi, V., Sejdiu, B.I., Mesa-Galloso, H., Abdizadeh, H., Noskov, S.Y., Marrink,**  
1253 **S.J., and Tieleman, D.P.** (2019). Emerging Diversity in Lipid–Protein  
1254 Interactions. *Chem. Rev.* **119**: 5775–5848.
- 1255 **Cox, J., Hein, M.Y., Lubner, C.A., Paron, I., Nagaraj, N., and Mann, M.** (2014).  
1256 Accurate proteome-wide label-free quantification by delayed normalization and  
1257 maximal peptide ratio extraction, termed MaxLFQ. *Mol. Cell. Proteomics* **13**:  
1258 2513–2526.
- 1259 **Cox, J. and Mann, M.** (2008). MaxQuant enables high peptide identification rates,  
1260 individualized p.p.b.-range mass accuracies and proteome-wide protein  
1261 quantification. *Nat. Biotechnol.* **26**: 1367–1372.
- 1262 **Cui, S., Hayashi, Y., Otomo, M., Mano, S., Oikawa, K., Hayashi, M., and**  
1263 **Nishimura, M.** (2016). Sucrose Production Mediated by Lipid Metabolism  
1264 Suppresses the Physical Interaction of Peroxisomes and Oil Bodies during  
1265 Germination of *Arabidopsis thaliana*. *J. Biol. Chem.* **291**: 19734–19745.
- 1266 **Curtis, M.D. and Grossniklaus, U.** (2003). A Gateway Cloning Vector Set for High-  
1267 Throughput Functional Analysis of Genes in Planta. *Plant Physiol.* **133**: 462–  
1268 469.
- 1269 **Czechowski, T., Stitt, M., Altmann, T., Udvardi, M.K., and Scheible, W.R.** (2005).  
1270 Genome-wide identification and testing of superior reference genes for transcript

- 1271 normalization in arabidopsis. *Plant Physiol.* **139**: 5–17.
- 1272 **Eastmond, P.J.** (2006). SUGAR-DEPENDENT1 encodes a patatin domain  
1273 triacylglycerol lipase that initiates storage oil breakdown in germinating  
1274 Arabidopsis seeds. *Plant Cell* **18**: 665–675.
- 1275 **Eisenberg-Bord, M., Shai, N., Schuldiner, M., and Bohnert, M.** (2016). A Tether Is  
1276 a Tether Is a Tether: Tethering at Membrane Contact Sites. *Dev. Cell* **39**: 395–  
1277 409.
- 1278 **Esnay, N., Dyer, J.M., Mullen, R.T., and Chapman, K.D.** (2020). Lipid Droplet–  
1279 Peroxisome Connections in Plants. *Contact* **3**: 251525642090876.
- 1280 **Fan, J., Yu, L., and Xu, C.** (2017). A Central Role for Triacylglycerol in Membrane  
1281 Lipid Breakdown, Fatty Acid  $\beta$  -Oxidation, and Plant Survival under Extended  
1282 Darkness. *Plant Physiol.* **174**: 1517–1530.
- 1283 **Freyre, C.A.C., Rauher, P.C., Ejsing, C.S., and Klemm, R.W.** (2019). MIGA2 Links  
1284 Mitochondria, the ER, and Lipid Droplets and Promotes De Novo Lipogenesis in  
1285 Adipocytes. *Mol. Cell* **76**: 811-825.e14.
- 1286 **Gao, Q. and Goodman, J.M.** (2015). The lipid droplet—a well-connected organelle.  
1287 *Front. Cell Dev. Biol.* **3**: 1–12.
- 1288 **Gautier, R., Douguet, D., Antony, B., and Drin, G.** (2008). HELIQUEST: A web  
1289 server to screen sequences with specific  $\alpha$ -helical properties. *Bioinformatics* **24**:  
1290 2101–2102.
- 1291 **Geltinger, F., Tevini, J., Briza, P., Geiser, A., Bischof, J., Richter, K., Felder, T.,  
1292 and Rinnerthaler, M.** (2020). The transfer of specific mitochondrial lipids and  
1293 proteins to lipid droplets contributes to proteostasis upon stress and aging in the  
1294 eukaryotic model system *Saccharomyces cerevisiae*. *GeroScience* **42**: 19–38.
- 1295 **Gidda, S.K., Park, S., Pyc, M., Yurchenko, O., Cai, Y., Wu, P., Andrews, D.W.,  
1296 Chapman, K.D., Dyer, J.M., and Mullen, R.T.** (2016). Lipid droplet-associated

- 1297 proteins (LDAPs) are required for the dynamic regulation of neutral lipid  
1298 compartmentation in plant cells. *Plant Physiol.* **170**: 2052–2071.
- 1299 **Gietz, R.D. and Schiestl, R.H.** (2007). High-efficiency yeast transformation using the  
1300 LiAc/SS carrier DNA/PEG method. *Nat. Protoc.* **2**: 31–34.
- 1301 **Greer, M.S., Cai, Y., Gidda, S.K., Esnay, N., Kretzschmar, F.K., Seay, D.,**  
1302 **McClinchie, E., Ischebeck, T., Mullen, R.T., Dyer, J.M., and Chapman, K.D.**  
1303 (2020). SEIPIN Isoforms Interact with the Membrane-Tethering Protein VAP27-1  
1304 for Lipid Droplet Formation. *Plant Cell* **32**: 2932–2950.
- 1305 **Hariri, H., Speer, N., Bowerman, J., Rogers, S., Fu, G., Reetz, E., Datta, S.,**  
1306 **Feathers, J.R., Ugrankar, R., Nicastro, D., and Henne, W.M.** (2019). Mdm1  
1307 maintains endoplasmic reticulum homeostasis by spatially regulating lipid droplet  
1308 biogenesis. *J. Cell Biol.* **218**: 1319–1334.
- 1309 **Hillmer, S., Viotti, C., and Robinson, D.G.** (2012). An improved procedure for low-  
1310 temperature embedding of high-pressure frozen and freeze-substituted plant  
1311 tissues resulting in excellent structural preservation and contrast. *J. Microsc.*  
1312 **247**: 43–47.
- 1313 **Hornung, E., Pernstich, C., and Feussner, I.** (2002). Formation of conjugated  $\Delta^{11}$   
1314  $\Delta^{13}$ -double bonds by  $\Delta^{12}$ -linoleic acid (1,4)-acyl-lipid-desaturase in  
1315 pomegranate seeds. *Eur. J. Biochem.* **269**: 4852–4859.
- 1316 **Hugenroth, M. and Bohnert, M.** (2020). Come a little bit closer! Lipid droplet-ER  
1317 contact sites are getting crowded. *Biochim. Biophys. Acta - Mol. Cell Res.* **1867**:  
1318 118603.
- 1319 **Humphrey, W., Dalke, A., and Schulten, K.** (1996). VMD: Visual molecular  
1320 dynamics. *J. Mol. Graph.* **14**: 33–38.
- 1321 **Ischebeck, T., Krawczyk, H.E., Mullen, R.T., Dyer, J.M., and Chapman, K.D.**  
1322 (2020). Lipid droplets in plants and algae: Distribution, formation, turnover and

- 1323 function. *Semin. Cell Dev. Biol.* **108**: 82–93.
- 1324 **Johnson, M.R., Stephenson, R.A., Ghaemmaghami, S., and Welte, M.A.** (2018).  
1325 Developmentally regulated H2AV buffering via dynamic sequestration to lipid  
1326 droplets in *Drosophila* embryos. *Elife* **7**: 1–28.
- 1327 **Jumper, J. et al.** (2021). Highly accurate protein structure prediction with AlphaFold.  
1328 *Nature* **596**: 583–589.
- 1329 **Jurrus, E. et al.** (2018). Improvements to the APBS biomolecular solvation software  
1330 suite. *Protein Sci.* **27**: 112–128.
- 1331 **Kang, B.-H. et al.** (2021). A glossary of plant cell structures: current insights and  
1332 future questions. *Plant Cell*. doi: 10.1093/plcell/koab247. Online ahead of print.
- 1333 **Klepikova, A. V., Kasianov, A.S., Gerasimov, E.S., Logacheva, M.D., and Penin,**  
1334 **A.A.** (2016). A high resolution map of the *Arabidopsis thaliana* developmental  
1335 transcriptome based on RNA-seq profiling. *Plant J.* **88**: 1058–1070.
- 1336 **Kory, N., Farese, R. V., and Walther, T.C.** (2016). Targeting Fat: Mechanisms of  
1337 Protein Localization to Lipid Droplets. *Trends Cell Biol.* **26**: 535–546.
- 1338 **Kretzschmar, F.K., Doner, N.M., Krawczyk, H.E., Scholz, P., Schmitt, K.,**  
1339 **Valerius, O., Braus, G.H., Mullen, R.T., and Ischebeck, T.** (2020).  
1340 Identification of Low-Abundance Lipid Droplet Proteins in Seeds and Seedlings.  
1341 *Plant Physiol.* **182**: 1326–1345.
- 1342 **Kretzschmar, F.K., Mengel, L.A., Müller, A.O., Schmitt, K., Bliersch, K.F.,**  
1343 **Valerius, O., Braus, G.H., and Ischebeck, T.** (2018). PUX10 Is a Lipid Droplet-  
1344 Localized Scaffold Protein That Interacts with CELL DIVISION CYCLE48 and Is  
1345 Involved in the Degradation of Lipid Droplet Proteins. *Plant Cell* **30**: 2137–2160.
- 1346 **Kyte, J. and Doolittle, R.F.** (1982). A simple method for displaying the hydrophobic  
1347 character of a protein. *J. Mol. Biol.* **157**: 105–132.
- 1348 **Livak, K.J. and Schmittgen, T.D.** (2001). Analysis of relative gene expression data

- 1349 using real-time quantitative PCR and the  $2^{-\Delta\Delta CT}$  method. *Methods* **25**: 402–  
1350 408.
- 1351 **Lundquist, P.K., Shivaiah, K.K., and Espinoza-Corral, R.** (2020). Lipid droplets  
1352 throughout the evolutionary tree. *Prog. Lipid Res.* **78**: 101029.
- 1353 **Lupas, A., Van Dyke, M., and Stock, J.** (1991). Predicting coiled coils from protein  
1354 sequences. *Science* (80-. ). **252**: 1162–1164.
- 1355 **Marrink, S.J., Corradi, V., Souza, P.C.T., Ingólfsson, H.I., Tieleman, D.P., and**  
1356 **Sansom, M.S.P.** (2019). Computational Modeling of Realistic Cell Membranes.  
1357 *Chem. Rev.* **119**: 6184–6226.
- 1358 **Mier, P., Alanis-Lobato, G., and Andrade-Navarro, M.A.** (2017). Protein-protein  
1359 interactions can be predicted using coiled coil co-evolution patterns. *J. Theor.*  
1360 *Biol.* **412**: 198–203.
- 1361 **Miquel, M. and Browse, J.** (1992). Arabidopsis mutants deficient in polyunsaturated  
1362 fatty acid synthesis: Biochemical and genetic characterization of a plant oleoyl-  
1363 phosphatidylcholine desaturase. *J. Biol. Chem.* **267**: 1502–1509.
- 1364 **Mirdita, M., Schütze, K., Moriwaki, Y., Heo, L., Ovchinnikov, S., & Steinegger, M.**  
1365 (2021). ColabFold - Making protein folding accessible to all. *BioRxiv* [Preprint],  
1366 2021.08.15.456425 [accessed 11 January 2022]. Available from:  
1367 <https://doi.org/10.1101/2021.08.15.456425>.
- 1368 **Muliyil, S., Levet, C., Düsterhöft, S., Dulloo, I., Cowley, S.A., and Freeman, M.**  
1369 (2020). ADAM 17-triggered TNF signalling protects the ageing Drosophila retina  
1370 from lipid droplet-mediated degeneration . *EMBO J.* **39**:e104415.
- 1371 **Müller, A.O., Biersch, K.F., Gippert, A.L., and Ischebeck, T.** (2017). Tobacco  
1372 pollen tubes - a fast and easy tool for studying lipid droplet association of plant  
1373 proteins. *Plant J.* **89**: 1055–1064.
- 1374 **Müller, A.O. and Ischebeck, T.** (2018). Characterization of the enzymatic activity

- 1375 and physiological function of the lipid droplet-associated triacylglycerol lipase  
1376 AtOBL1. *New Phytol.* **217**: 1062–1076.
- 1377 **Murashige, T. and Skoog, F.** (1962). A Revised Medium for Rapid Growth and Bio  
1378 Assays with Tobacco Tissue Cultures. *Physiol. Plant.* **15**: 473–497.
- 1379 **Nakabayashi, K., Okamoto, M., Koshiba, T., Kamiya, Y., and Nambara, E.** (2005).  
1380 Genome-wide profiling of stored mRNA in *Arabidopsis thaliana* seed  
1381 germination: Epigenetic and genetic regulation of transcription in seed. *Plant J.*  
1382 **41**: 697–709.
- 1383 **Needleman, S.B. and Wunsch, C.D.** (1970). A general method applicable to the  
1384 search for similarities in the amino acid sequence of two proteins. *J. Mol. Biol.*  
1385 **48**: 443–453.
- 1386 **Noack, L.C. and Jaillais, Y.** (2020). Functions of Anionic Lipids in Plants. *Annu.*  
1387 *Rev. Plant Biol.* **71**: 71–102.
- 1388 **Notredame, C., Higgins, D.G., and Heringa, J.** (2000). T-coffee: A novel method for  
1389 fast and accurate multiple sequence alignment. *J. Mol. Biol.* **302**: 205–217.
- 1390 **Olzmann, J.A. and Carvalho, P.** (2019). Dynamics and functions of lipid droplets.  
1391 *Nat. Rev. Mol. Cell Biol.* **20**: 137–155.
- 1392 **Park, J., Bae, S., and Kim, J.S.** (2015). Cas-Designer: A web-based tool for choice  
1393 of CRISPR-Cas9 target sites. *Bioinformatics* **31**: 4014–4016.
- 1394 **Petrie, J.R., Shrestha, P., Liu, Q., Mansour, M.P., Wood, C.C., Zhou, X.R.,**  
1395 **Nichols, P.D., Green, A.G., and Singh, S.P.** (2010). Rapid expression of  
1396 transgenes driven by seed-specific constructs in leaf tissue: DHA production.  
1397 *Plant Methods* **6**: 8.
- 1398 **Prinz, W.A., Toulmay, A., and Balla, T.** (2020). The functional universe of  
1399 membrane contact sites. *Nat. Rev. Mol. Cell Biol.* **21**: 7–24.
- 1400 **Pyc, M. et al.** (2021). LDIP cooperates with SEIPIN and LDAP to facilitate lipid

- 1401 droplet biogenesis in Arabidopsis. *Plant Cell* **33**: 3076–3103.
- 1402 **Pyc, M., Cai, Y., Gidda, S.K., Yurchenko, O., Park, S., Kretzschmar, F.K.,**  
1403 **Ischebeck, T., Valerius, O., Braus, G.H., Chapman, K.D., Dyer, J.M., and**  
1404 **Mullen, R.T.** (2017). Arabidopsis lipid droplet-associated protein (LDAP) –  
1405 interacting protein (LDIP) influences lipid droplet size and neutral lipid  
1406 homeostasis in both leaves and seeds. *Plant J.* **92**: 1182–1201.
- 1407 **Read, S.M., Clarke, A.E., and Bacic, A.** (1993). Stimulation of growth of cultured  
1408 *Nicotiana tabacum* W 38 pollen tubes by poly(ethylene glycol) and Cu(II) salts.  
1409 *Protoplasma* **177**: 1–14.
- 1410 **Richardson, L. G. L., Howard, A. S. M., Khuu, N., Gidda, S. K., McCartney, A.,**  
1411 **Morphy, B. J., & Mullen, R. T.** (2011). Protein–Protein Interaction Network and  
1412 Subcellular Localization of the Arabidopsis Thaliana ESCRT Machinery.  
1413 *Frontiers in Plant Science*, **2**: 20.
- 1414 **Rossini, M., Pizzo, P., and Filadi, R.** (2020). Better to keep in touch: investigating  
1415 inter-organelle cross-talk. *FEBS J.*: **288**: 740-755.
- 1416 **Rotsch, A.H., Kopka, J., Feussner, I., and Ischebeck, T.** (2017). Central metabolite  
1417 and sterol profiling divides tobacco male gametophyte development and pollen  
1418 tube growth into eight metabolic phases. *Plant J.* **92**: 129–146.
- 1419 **Rueden, C.T., Schindelin, J., Hiner, M.C., DeZonia, B.E., Walter, A.E., Arena,**  
1420 **E.T., and Eliceiri, K.W.** (2017). ImageJ2: ImageJ for the next generation of  
1421 scientific image data. *BMC Bioinformatics* **18**: 1–26.
- 1422 **Rylott, E.L., Rogers, C.A., Gilday, A.D., Edgell, T., Larson, T.R., and Graham, I.A.**  
1423 (2003). Arabidopsis Mutants in Short- and Medium-chain Acyl-CoA Oxidase  
1424 Activities Accumulate Acyl-CoAs and Reveal That Fatty Acid  $\beta$ -Oxidation Is  
1425 Essential for Embryo Development. *J. Biol. Chem.* **278**: 21370–21377.
- 1426 **Salo, V.T. et al.** (2019). Seipin Facilitates Triglyceride Flow to Lipid Droplet and



- 1427 Counteracts Droplet Ripening via Endoplasmic Reticulum Contact. *Dev. Cell* **50**:  
1428 478-493.e9.
- 1429 **Schaffer, J.E.** (2003). Lipotoxicity: when tissues overeat. *Curr. Opin. Lipidol.* **14**:  
1430 281–287.
- 1431 **Schapiro, A.L., Voigt, B., Jasik, J., Rosado, A., Lopez-Cobollo, R., Menzel, D.,**  
1432 **Salinas, J., Mancuso, S., Valpuesta, V., Baluska, F., and Botella, M.A.**  
1433 (2008). Arabidopsis synaptotagmin 1 is required for the maintenance of plasma  
1434 membrane integrity and cell viability. *Plant Cell* **20**: 3374–3388.
- 1435 **Schauder, C.M., Wu, X., Saheki, Y., Narayanaswamy, P., Torta, F., Wenk, M.R.,**  
1436 **De Camilli, P., and Reinisch, K.M.** (2014). Structure of a lipid-bound extended  
1437 synaptotagmin indicates a role in lipid transfer. *Nature* **510**: 552–555.
- 1438 **Schmid, M., Davison, T.S., Henz, S.R., Pape, U.J., Demar, M., Vingron, M.,**  
1439 **Schölkopf, B., Weigel, D., and Lohmann, J.U.** (2005). A gene expression map  
1440 of Arabidopsis thaliana development. *Nat. Genet.* **37**: 501–506.
- 1441 **Schuldiner, M. and Bohnert, M.** (2017). A different kind of love – lipid droplet  
1442 contact sites. *Biochim. Biophys. Acta - Mol. Cell Biol. Lipids* **1862**: 1188–1196.
- 1443 **Shai, N. et al.** (2018). Systematic mapping of contact sites reveals tethers and a  
1444 function for the peroxisome-mitochondria contact. *Nat. Commun.* **9**: 1761.
- 1445 **Shai, N., Schuldiner, M., and Zalckvar, E.** (2016). No peroxisome is an island -  
1446 Peroxisome contact sites. *Biochim. Biophys. Acta - Mol. Cell Res.* **1863**: 1061–  
1447 1069.
- 1448 **Shockey, J.M., Gidda, S.K., Chapital, D.C., Kuan, J.C., Dhanoa, P.K., Bland,**  
1449 **J.M., Rothstein, S.J., Mullen, R.T., and Dyer, J.M.** (2006). Tung tree DGAT1  
1450 and DGAT2 have nonredundant functions in triacylglycerol biosynthesis and are  
1451 localized to different subdomains of the endoplasmic reticulum. *Plant Cell* **18**:  
1452 2294–2313.

- 1453 **Siao, W., Wang, P., Voigt, B., Hussey, P.J., and Baluska, F.** (2016). Arabidopsis  
1454 SYT1 maintains stability of cortical endoplasmic reticulum networks and VAP27-  
1455 1-enriched endoplasmic reticulum-plasma membrane contact sites. *J. Exp. Bot.*  
1456 **67**: 6161–6171.
- 1457 **Souza, P.C.T. et al.** (2021). Martini 3: a general purpose force field for coarse-  
1458 grained molecular dynamics. *Nat. Methods* **18**: 382–388.
- 1459 **Sparkes, I.A., Runions, J., Kearns, A., and Hawes, C.** (2006). Rapid, transient  
1460 expression of fluorescent fusion proteins in tobacco plants and generation of  
1461 stably transformed plants. *Nat. Protoc.* **1**: 2019–2025.
- 1462 **Srinivasan, S., Zoni, V., and Vanni, S.** (2021). Estimating the accuracy of the  
1463 MARTINI model towards the investigation of peripheral protein–membrane  
1464 interactions. *Faraday Discuss.* **232**: 131–148.
- 1465 **Sui, X., Arlt, H., Brock, K.P., Lai, Z.W., DiMaio, F., Marks, D.S., Liao, M., Farese,  
1466 R. V., and Walther, T.C.** (2018). Cryo–electron microscopy structure of the lipid  
1467 droplet–formation protein seipin. *J. Cell Biol.* **217**: jcb.201809067.
- 1468 **Thiam, A.R. and Beller, M.** (2017). The why, when and how of lipid droplet diversity.  
1469 *J. Cell Sci.* **130**: 315–324.
- 1470 **Twell, D., Yamaguchi, J., Wing, R.A., Ushiba, J., and McCormick, S.** (1991).  
1471 Promoter analysis of genes that are coordinately expressed during pollen  
1472 development reveals pollen-specific enhancer sequences and shared regulatory  
1473 elements. *Genes Dev.* **5**: 496–507.
- 1474 **Tyanova, S., Temu, T., Sinitcyn, P., Carlson, A., Hein, M.Y., Geiger, T., Mann, M.,  
1475 and Cox, J.** (2016). The Perseus computational platform for comprehensive  
1476 analysis of (prote)omics data. *Nat. Methods* **13**: 731–740.
- 1477 **Ugrankar, R. et al.** (2019). *Drosophila* Snazarus Regulates a Lipid Droplet  
1478 Population at Plasma Membrane-Droplet Contacts in Adipocytes. *Dev. Cell* **50**:

- 1479 557-572.e5.
- 1480 **Valm, A.M., Cohen, S., Legant, W.R., Melunis, J., Hershberg, U., Wait, E., Cohen,**  
1481 **A.R., Davidson, M.W., Betzig, E., and Lippincott-Schwartz, J. (2017).**  
1482 Applying systems-level spectral imaging and analysis to reveal the organelle  
1483 interactome. *Nature* **546**: 162–167.
- 1484 **Varadi, M. et al. (2022).** AlphaFold Protein Structure Database: massively expanding  
1485 the structural coverage of protein-sequence space with high-accuracy models.  
1486 *Nucleic Acids Res.* **50**: D439–D444.
- 1487 **Velázquez, A.P., Tatsuta, T., Ghillebert, R., Drescher, I., and Graef, M. (2016).**  
1488 Lipid droplet-mediated ER homeostasis regulates autophagy and cell survival  
1489 during starvation. *J. Cell Biol.* **212**: 621–631.
- 1490 **Vizcaíno, J.A. et al. (2014).** ProteomeXchange provides globally coordinated  
1491 proteomics data submission and dissemination. *Nat. Biotechnol.* **32**: 223–226.
- 1492 **de Vries, J. and Ischebeck, T. (2020).** Ties between Stress and Lipid Droplets Pre-  
1493 date Seeds. *Trends Plant Sci.* **25**: 1203–1214.
- 1494 **Waese, J. et al. (2017).** ePlant: Visualizing and Exploring Multiple Levels of Data for  
1495 Hypothesis Generation in Plant Biology. *Plant Cell* **29**: 1806–1821.
- 1496 **Wang, Z.-P., Xing, H.-L., Dong, L., Zhang, H.-Y., Han, C.-Y., Wang, X.-C., and**  
1497 **Chen, Q.-J. (2015).** Egg cell-specific promoter-controlled CRISPR/Cas9  
1498 efficiently generates homozygous mutants for multiple target genes in  
1499 *Arabidopsis* in a single generation. *Genome Biol.* **16**: 144.
- 1500 **Wassenaar, T.A., Ingólfsson, H.I., Böckmann, R.A., Tieleman, D.P., and Marrink,**  
1501 **S.J. (2015).** Computational Lipidomics with insane: A Versatile Tool for  
1502 Generating Custom Membranes for Molecular Simulations. *J. Chem. Theory*  
1503 *Comput.* **11**: 2144–2155.
- 1504 **Welte, M.A. and Gould, A.P. (2017).** Lipid droplet functions beyond energy storage.

- 1505 Biochim. Biophys. Acta - Mol. Cell Biol. Lipids **1862**: 1260–1272.
- 1506 **Wilfling, F. et al.** (2013). Triacylglycerol synthesis enzymes mediate lipid droplet  
1507 growth by relocalizing from the ER to lipid droplets. *Dev. Cell* **24**: 384–399.
- 1508 **Winter, D., Vinegar, B., Nahal, H., Ammar, R., Wilson, G. V., and Provart, N.J.**  
1509 (2007). An “electronic fluorescent pictograph” Browser for exploring and  
1510 analyzing large-scale biological data sets. *PLoS One* **2**: 1–12.
- 1511 **Xie, Y., Zheng, Y., Li, H., Luo, X., He, Z., Cao, S., Shi, Y., Zhao, Q., Xue, Y., Zuo,**  
1512 **Z., and Ren, J.** (2016). GPS-Lipid: A robust tool for the prediction of multiple  
1513 lipid modification sites. *Sci. Rep.* **6**: 1–9.
- 1514 **Xing, H.-L., Dong, L., Wang, Z.-P., Zhang, H.-Y., Han, C.-Y., Liu, B., Wang, X.-C.,**  
1515 **and Chen, Q.-J.** (2014). A CRISPR/Cas9 toolkit for multiplex genome editing in  
1516 plants. *BMC Plant Biol.* **14**: 327.
- 1517 **Yamazaki, T., Kawamura, Y., Minami, A., and Uemura, M.** (2008). Calcium-  
1518 dependent freezing tolerance in arabidopsis involves membrane resealing via  
1519 synaptotagmin SYT1. *Plant Cell* **20**: 3389–3404.
- 1520 **Yang, H.J., Hsu, C.L., Yang, J.Y., and Yang, W.Y.** (2012). Monodansylpentane as a  
1521 blue-fluorescent lipid-droplet marker for multi-color live-cell imaging. *PLoS One*  
1522 **7**.
- 1523 **Yang, Y. and Benning, C.** (2018). Functions of triacylglycerols during plant  
1524 development and stress. *Curr. Opin. Biotechnol.* **49**: 191–198.
- 1525 **Yu, H., Liu, Y., Gulbranson, D.R., Paine, A., Rathore, S.S., and Shen, J.** (2016).  
1526 Extended synaptotagmins are Ca<sup>2+</sup>-dependent lipid transfer proteins at  
1527 membrane contact sites. *Proc. Natl. Acad. Sci. U. S. A.* **113**: 4362–4367.
- 1528 **Yu, J., Kang, L., Li, Y., Wu, C., Zheng, C., Liu, P., and Huang, J.** (2021). RING  
1529 finger protein RGLG1 and RGLG2 negatively modulate MAPKKK18 mediated  
1530 drought stress tolerance in Arabidopsis. *J. Integr. Plant Biol.* **63**: 484–493.

1531 **Zang, J., Zhang, T., Hussey, P.J., And Wang, P. (2020).** Light microscopy of the

1532 endoplasmic reticulum–membrane contact sites in plants. *J. Microsc.* **280**: 134–

1533 139.

1534

**Figure 1****A**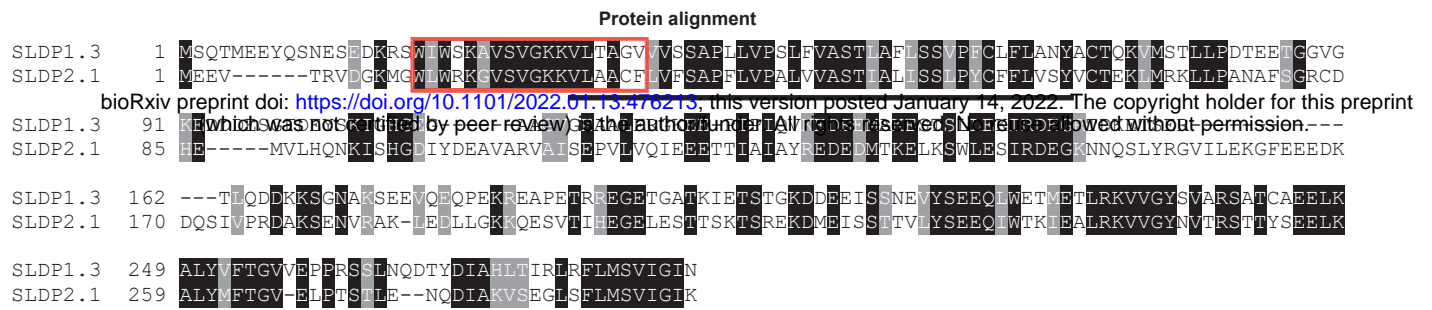**B**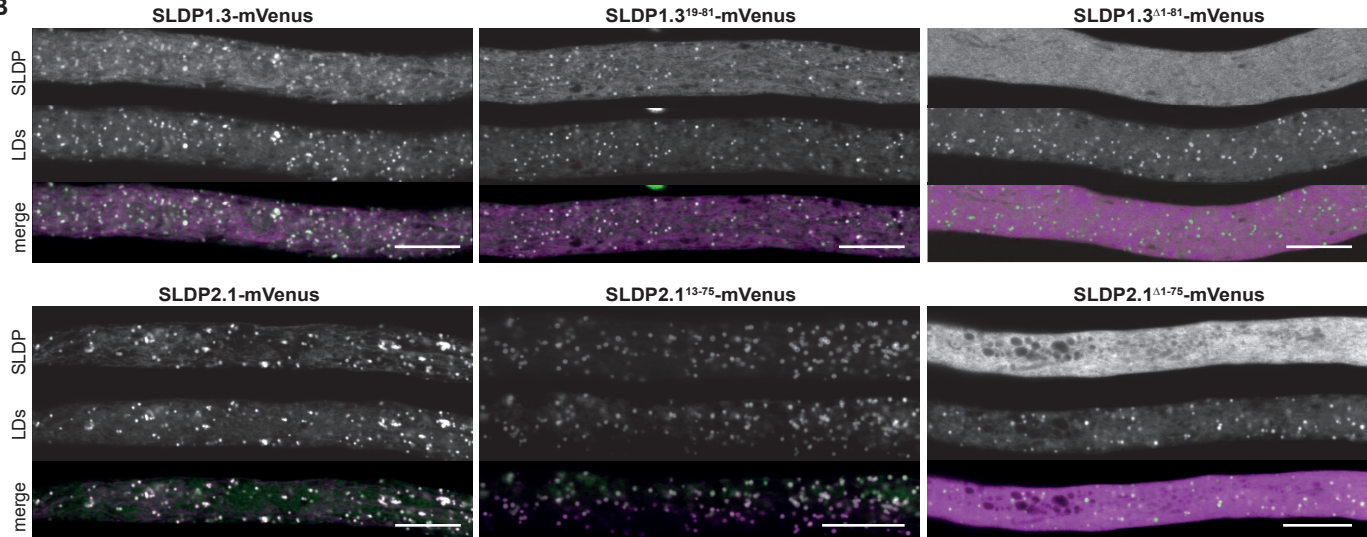**C**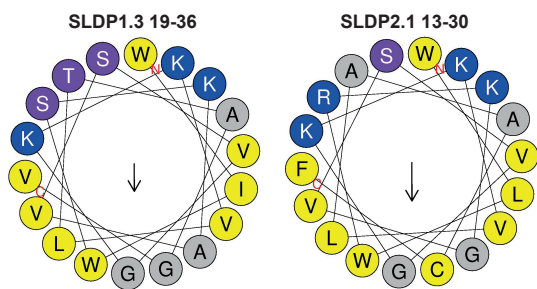**D**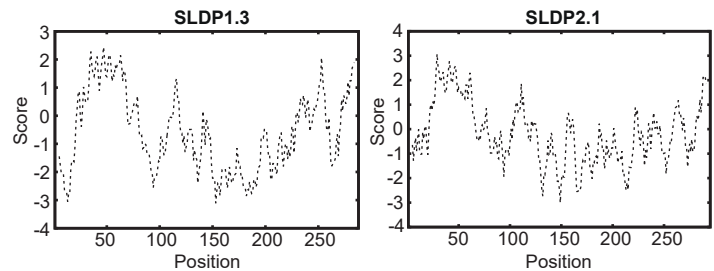**Figure 1. Arabidopsis has two SLDP isoforms that both localise to LDs**

**A** Amino acid sequence alignment of SLDP1.3 and SLDP2.1, as generated by T-Coffee. Identical and similar amino acids in SLDP1.3 and SLDP2.1 are shaded black and grey, respectively. Hydrophobic/uncharged regions, as predicted by ExPASy ProtScale, are underlined and potential amphipathic  $\alpha$ -helices, as predicted by Heliquest, are boxed. See Supplemental Figure 1 for the protein sequence alignment of five splice variants of Arabidopsis SLDP1 and SLDP2.

**B** CLSM images of transiently-expressed full-length and truncated versions of SLDP1.3 and SLDP2.1 appended to mVenus in transiently-transformed *N. tabacum* pollen tubes. Truncated fusion constructs either included sequences predicted to form an amphipathic  $\alpha$ -helix and hydrophobic sequences in SLDP1.3 and SLDP2.1 (i.e., SLDP1.3 19-81 and SLDP2.1 13-75) or were devoid of these sequences (i.e., SLDP1.3 $\Delta$ 1-81 and SLDP2.1 $\Delta$ 1-75); refer also to (A). LDs were stained with Nile red. Images are representative of at least 10 micrographs of transformed pollen tubes per fusion construct. In the merge images, fluorescence attributable to mVenus-tagged SLDP proteins and corresponding Nile red stained LDs are false-colored magenta and green, respectively; white colour represents co-localisation. Bars, 10  $\mu$ m.

**C** Helical wheel projection of the N-terminal regions of SLDP1.3 (amino acid residues 13-30) and SLDP2.1 (amino acid residues 16-39) predicted by Heliquest to form an amphipathic  $\alpha$ -helix. Hydrophobic amino acid residues are coloured yellow, hydrophilic and charged residues are magenta and blue respectively. The direction of the arrow in the helical wheel indicates the position of the hydrophobic face along the axis of the helix.

**D** Protein hydropathy profiles of the deduced amino acid sequences of SLDP1.3 and SLDP2.1 based on ProtScale. Note the relatively strong hydrophobic sequence in the N-terminal region of each protein.

**Figure 2**

**A**

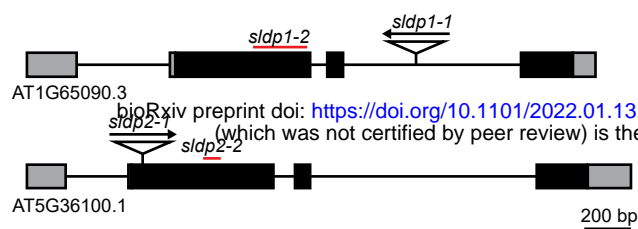

**B**

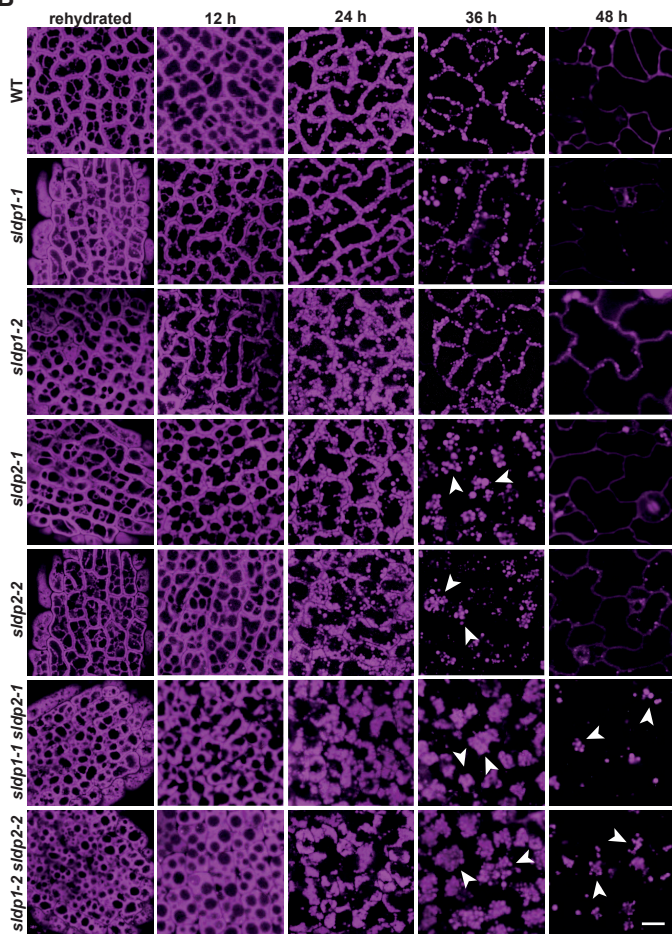

**Figure 2. Time-course analysis of LDs in *sldp* mutant Arabidopsis seeds and seedlings**

**A** Illustration depicting the Arabidopsis SLDP1.3 and SLDP2.1 genes based on information provided at TAIR. Indicated are the relative positions of the 5' and 3' untranslated regions (grey boxes), exons (black boxes), introns (black line), T-DNA insertion sites (triangle, arrow indicating direction of T-DNA), and the regions deleted with CRISPR/Cas9-based genome editing (red lines).

**B** CLSM images of rehydrated seeds and seedling cotyledon cells from WT and various *sldp1* and *sldp2* mutant Arabidopsis lines. Seeds were rehydrated for 1 h or stratified for 4 days at 4 °C in the dark. LDs were stained with Nile red after rehydration, or 12, 24, 36 and 48 h ( $\pm$  2 h) after stratification. Arrowheads indicate obvious examples of LD clusters in *sldp2* single and *sldp1 sldp2* double mutant seedling. Images are single plane images from the middle of the cell (similar planes were chosen for all images). Images are representative of at least five micrographs of seeds and seedlings for each plant line and time point. Bar, 10  $\mu$ m, applies to all images in the panels.

**Figure 3**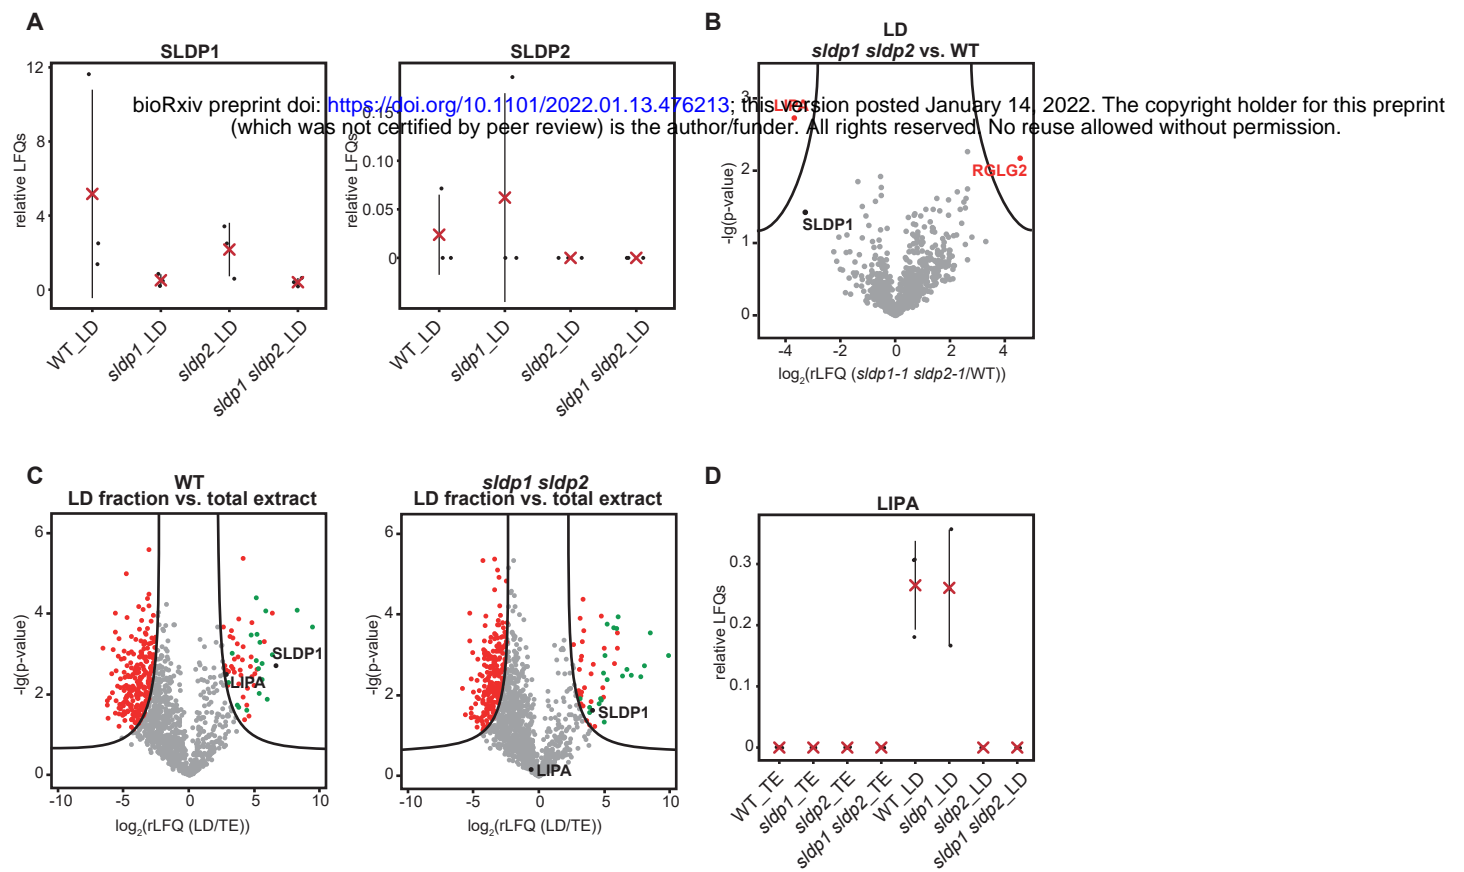**Figure 3. Proteomic analysis of sldp mutants**

Proteins were isolated from germinating seedlings 36 h after stratification. Proteins from LD-enriched fractions and total protein fractions were analysed by LC-MS/MS after a tryptic in-gel digest (n=3 biological replicates).

**A** rLFQ values of SLDP1 and SLDP2 analysed in LD-enriched fractions of different Arabidopsis lines (red cross = mean, lines = SD, n=3).

**B** Volcano plot of imputed rLFQ values from LD fractions of the wild type versus *sldp1-1 sldp2-1*. It displays proteins differentially accumulating in the double mutant. Top left-hand corner proteins are significantly reduced in *sldp1-1 sldp2-1* LD fractions, top right-hand corner proteins are significantly reduced in wild-type LD fractions.

**C** Volcano plots of imputed rLFQ values from TE versus LD fractions of wild-type and *sldp1-1 sldp2-1* seedlings, to detect proteins enriched at LDs. Proteins in the top right-hand corner are significantly enriched at LDs in the respective analysed line. SLDP1 and LIPA are marked in black and known LD-proteins among the significantly LD-enriched proteins are marked in green.

**D** rLFQ values of LIPA analysed in LD- and TE-enriched fractions of different Arabidopsis lines (red cross, mean; lines, SD; dots, individual data points; n=3).



**Figure 4**

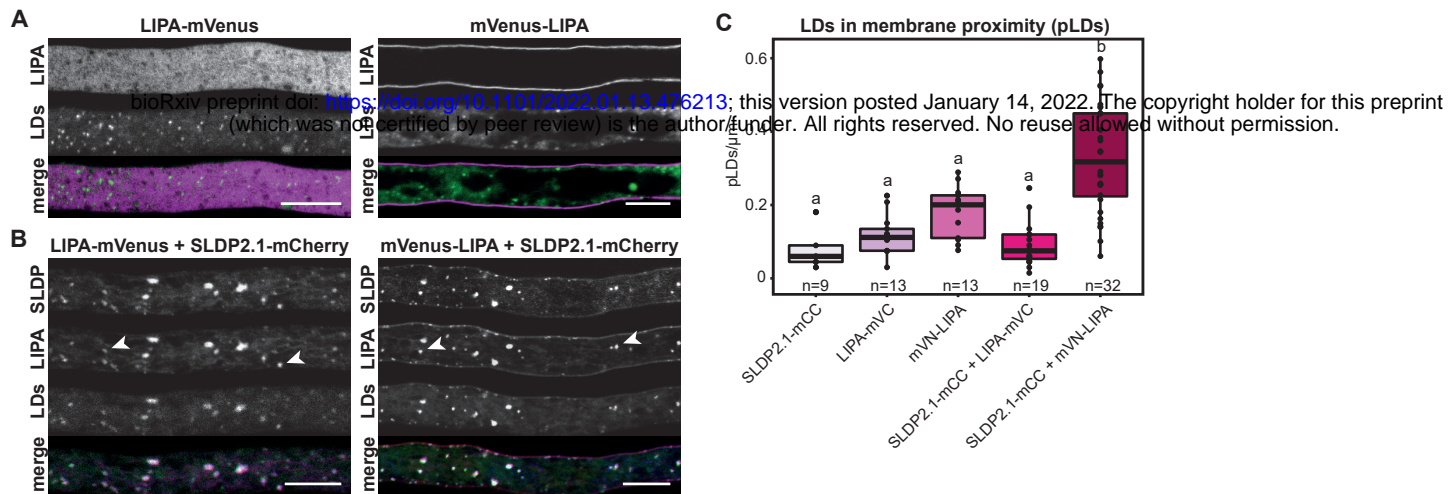

**Figure 4. Subcellular localisation of LIPA in tobacco pollen tubes**

**A, B** CLSM images of LIPA-mVenus and mVenus-LIPA transiently-expressed alone (**A**) or co-expressed (**B**) with SLDP2.1-mCherry in *N. tabacum* pollen tubes. LDs were stained with Lipi-Blue. LIPA colocalises with LDs only in the presence of SLDP2.1 (see arrowheads) but not when expressed alone. Images are representative of at least 5 micrographs of transformed pollen tubes with the indicated fusion construct(s). For merged images with two channels: magenta: mVenus (LIPA); green: LDs. For merged images with three channels: red: mVenus (LIPA), blue: mCherry (SLDP), green: LDs. Bars, 10  $\mu$ m.

**C** Analysis of LDs in proximity to the PM. Lipi-Blue-stained LDs adjacent to the PM (i.e., pLDs) in *N. tabacum* pollen tubes (refer to **A, B**) were counted manually and the number of pLDs per  $\mu$ m was calculated for each indicated construct(s). Results are presented as boxplots (displaying lower hinge = 25% quantile, median = 50% quantile, upper hinge = 75% quantile, upper whisker = largest observation less than or equal to upper hinge + 1.5 \* IQR, lower whisker = smallest observation greater than or equal to lower hinge - 1.5 \* IQR). One-way ANOVA was performed, followed by Tukey post-hoc analysis ( $F(4,81) = 23.37$ ,  $p = 7.24 \times 10^{-13}$ ,  $n =$  as indicated). Note that only the SLDP2.1 + mVenus-LIPA co-bombardment increased the number of pLDs compared to the single bombardment controls. Statistical results are presented as compact letter display of all pair-wise comparisons.

**Figure 5**

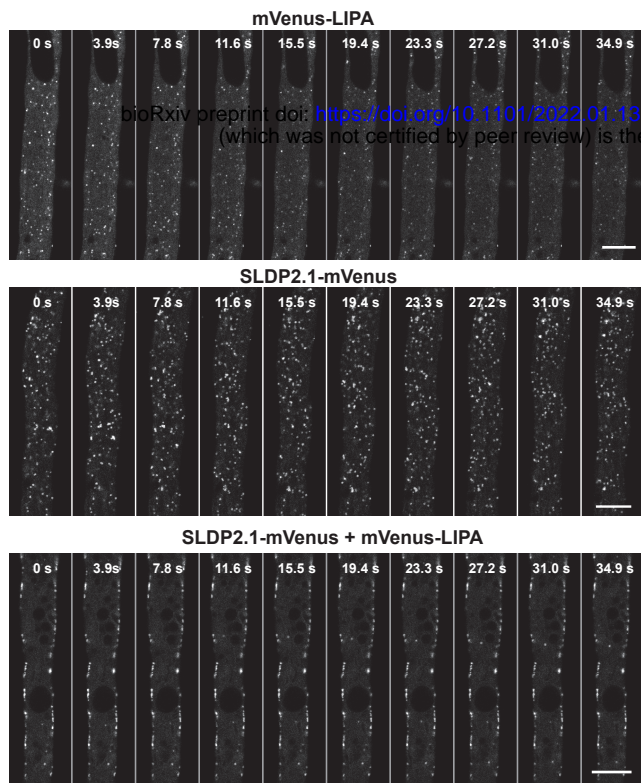

bioRxiv preprint doi: <https://doi.org/10.1101/2022.01.13.476213>; this version posted January 14, 2022. The copyright holder for this preprint (which was not certified by peer review) is the author/funder. All rights reserved. No reuse allowed without permission.

**Figure 5. LD mobility analysis of LIPA and SLDP2.1 transformed tobacco pollen tubes**

CLSM images of mVenus-LIPA and SLDP2.1-mVenus transiently expressed either alone or together in *N. tabacum* pollen tubes. Pollen tubes were stained with Nile red and LD dynamics were recorded over the indicated time course. Images are representative of time-course series of 5 transformed pollen tubes with each of the indicated fusion construct(s). Note in mVenus-LIPA and SLDP2.1-mVenus-transformed pollen tubes, LDs display dynamic cytoplasmic streaming, while in mVenus-LIPA and SLDP2.1-mVenus co-transformed pollen tubes LDs were predominantly immobilised at the PM. Bars, 10  $\mu$ m.

**Figure 6****A**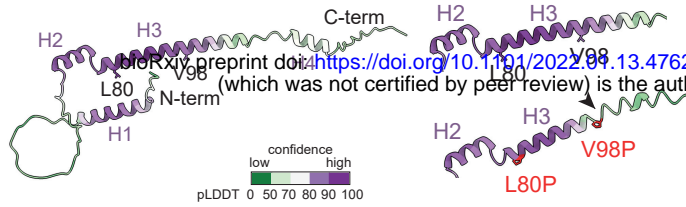**B**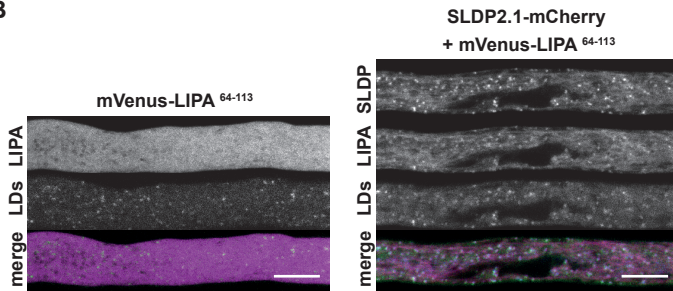**C**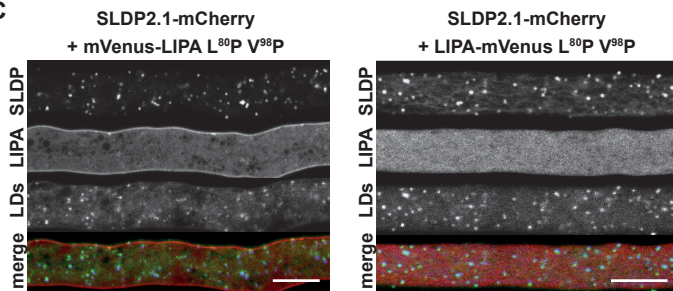**Figure 6. Analysis of the predicted  $\alpha$ -helical/coiled-coil domain in LIPA**

**A** Predicted structure of LIPA (left). The mutation of the L80 and V98 in helix 3 (right) to proline residues leads to a shortening of the helix (black arrow). Structures were generated using the AlphaFold2 algorithm. The models are coloured by local model confidence (pLDDT) as calculated by AlphaFold2. The pLDDT > 90 (dark purple) indicates regions of high prediction accuracy of both backbone and side chains. The pLDDT > 70 (white) indicates high-confidence backbone prediction. Regions in light and dark green (pLDDT < 70) represent low confidence predictions.

**B, C** CLSM images of mVenus-LIPA64-113 and SLDP2.1-mCherry (**B**) and mVenus-LIPA L80P V98P or LIPA L80P V98P-mVenus and SLDP2.1-mCherry (**C**) transiently-expressed in *N. tabacum* pollen tubes. LDs were stained with Lipi-Blue. Images are representative of at least 5 micrographs of transformed pollen tubes with the indicated fusion construct(s). Note that mVenus-LIPA64-113, but not mVenus-LIPA-L80P V98P or LIPA-L80P V98P-mVenus re-locate to LDs upon SLDP2.1-mCherry co-expression. For merged images with two channels: magenta: mVenus (LIPA); green: LDs. For merged images with three channels red: mVenus (LIPA), blue: mCherry (SLDP), green: LDs. Bars, 10  $\mu$ m.

**Figure 7****A**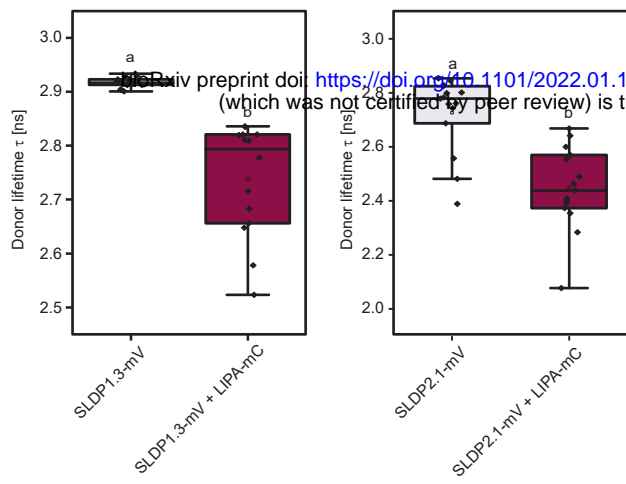

bioRxiv preprint doi: <https://doi.org/10.1101/2022.01.13.476213>; this version posted January 14, 2022. The copyright holder for this preprint (which was not certified by peer review) is the author/funder. All rights reserved. No reuse allowed without permission.

**B**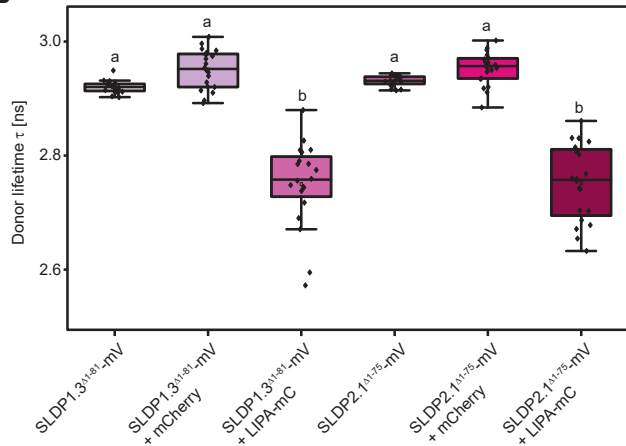**C**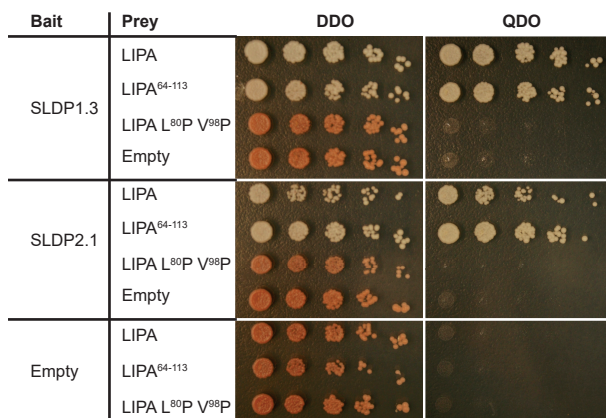**Figure 7. SLDP and LIPA interaction assays by FRET-FLIM and Y2H**

**A** Full-length versions of SLDPs tagged with mVenus (mV) were expressed in tobacco pollen tubes either alone or in combination with the cytosolic LIPA-mCherry (LIPA-mC). Co-expression led to a recruitment of LIPA-mCherry to the LDs and a significant reduction of the donor lifetime. Fig7A: One-way ANOVA was performed, followed by Tukey post-hoc analysis (left panel:  $F(1,27) = 43.85$ ,  $p = 4.18e-07$ ,  $n_1=15$ ,  $n_2=14$ ; right panel:  $F(1,28) = 27.33$ ,  $p = 1.49e-05$ ,  $n = 15$ ). Statistical results are presented as compact letter display of all pair-wise comparisons.

**B** The expression of truncated cytosolic versions of the SLDPs with cytosolic LIPA-mCherry also led to a reduction of the donor lifetime in comparison to expression of the SLDPs alone, or of the SLDPs in combination with mCherry. One-way ANOVA was performed, followed by Tukey post-hoc analysis ( $F(5,114) = 94.57$ ,  $p = 6.68e-39$ ,  $n=20$ ). Statistical results are presented as compact letter display of all pair-wise comparisons.

**C** Y2H interaction analysis of SLDP1, SLDP2 and LIPA. Yeast (*S. cerevisiae*) were co-transformed with bait (pGBKT7) plasmids containing full-length SLDP1 or SLDP2 and prey (pGADT7) plasmids containing LIPA or modified versions thereof, or with the corresponding empty plasmids serving as negative controls. Serial dilutions of transformed yeast cell cultures were then plated onto either plasmid-selection conditions (double drop out medium, DDO), or higher stringency selection conditions (quadruple drop out medium, QDO) where yeast cell growth requires a Y2H protein-protein interaction. Note that only yeast cells co-expressing SLDP1 or SLDP2 and LIPA or LIPA64-113, but not LIPA L80P V98P, grew on QDO plates. Results shown are representative of three separate co-transformations of yeast with each plasmid combination.

**Figure 8****A**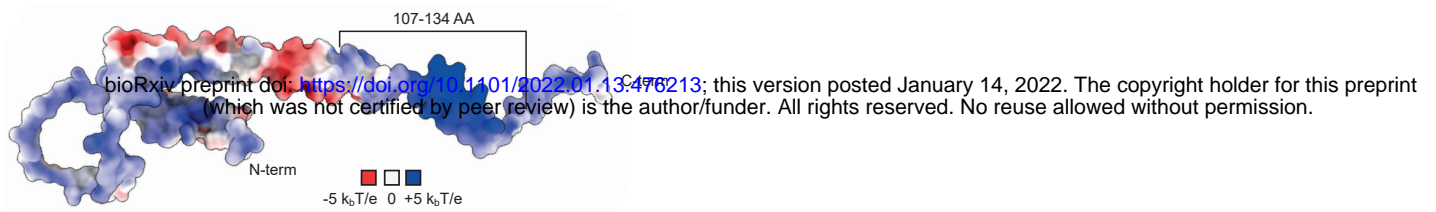**B**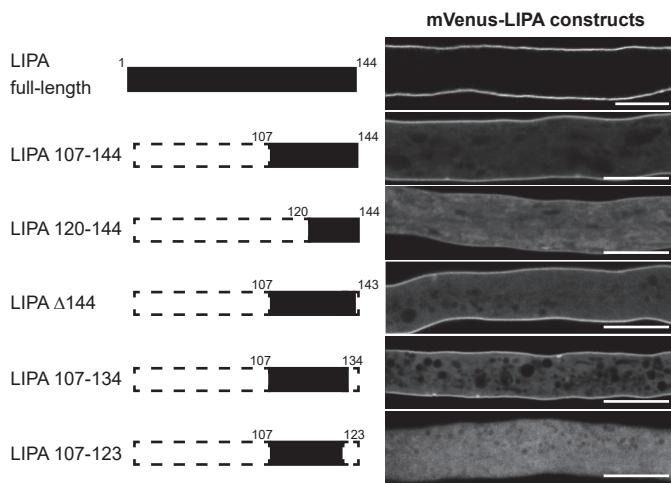**C**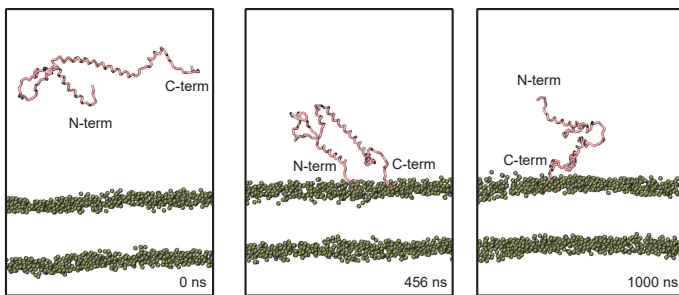**D**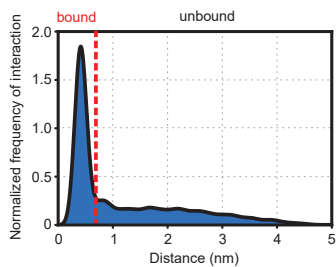**E**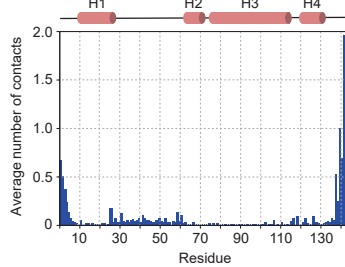**Figure 8. PM-localisation of LIPA**

**A** Electrostatic potential mapped onto the solvent-excluded surface of the LIPA structure. Charge distribution indicates a strong accumulation of positively charged residues in the C-terminal region, especially region 107-134.

**B** Illustrations and CLSM images of full-length and various truncation versions of LIPA appended to mVenus in transiently-transformed *N. tabacum* pollen tubes. Images are representative micrographs of at least 10 transformed pollen tubes. Bars, 10  $\mu$ m.

**C** Snapshots from the molecular dynamics (MD) simulations. Different time points are indicated. The protein is shown in the ribbon representation (pink). Only phosphate groups of the lipid bilayer are shown for the sake of clarity.

**D** Probability density distribution of protein-membrane minimum distances shows a significant portion of the bound protein to the lipid bilayer.

**E** Mean number of contacts between protein and phosphate group of the lipid bilayer. The contacts were defined as the number of phosphate groups within 0.8 nm of protein atoms. The C-terminus displays the highest number of contacts, but helix H1 and the adjacent linker also contribute to the interaction. The secondary structure is indicated above the plot.

**Figure 9**

**A**

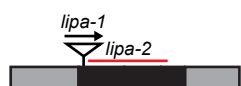

bioRxiv preprint doi: <https://doi.org/10.1101/2022.01.13.476213>; this version posted January 14, 2022. The copyright holder for this preprint (which was not certified by peer review) is the author/funder. All rights reserved. No reuse allowed without permission.

**B**

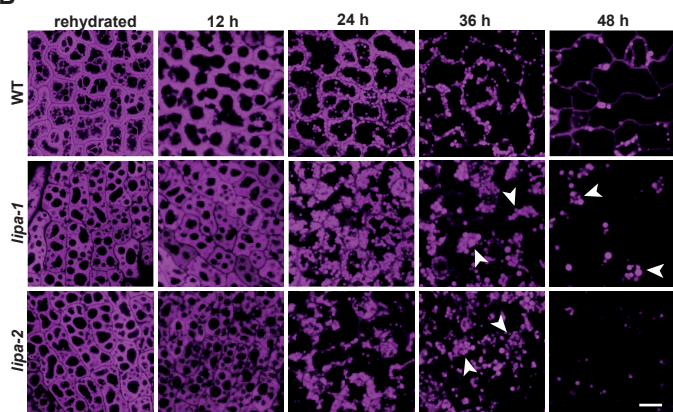

**Figure 9: Time-course analysis of LDs in cotyledons**

**A** Schematic depiction of the LIPA gene with untranslated regions (grey boxes), one exon (black box), T-DNA insertion site (triangle, arrow indicating direction of T-DNA) and the region deleted by CRISPR/Cas9 genome editing (red line).

**B** CLSM images of rehydrated seeds and seedling cotyledon cells from WT and *lipa-1* and *lipa-2* mutant Arabidopsis lines. Seeds were rehydrated for 1 h or stratified for 4 days at 4 °C in the dark. LDs were stained with Nile red after rehydration, or 12, 24, 36 and 48 h ( $\pm$  2 h) after stratification. Arrowheads indicate obvious examples of LD clusters in *lipa* mutant seedling. Images are single plane images from the middle of the cell (similar planes were chosen for all images). Images are representative of at least five micrographs of seeds and seedlings for each plant line and time point. Bar, 10  $\mu$ m and applies to all images in the panels.

**Figure 10**

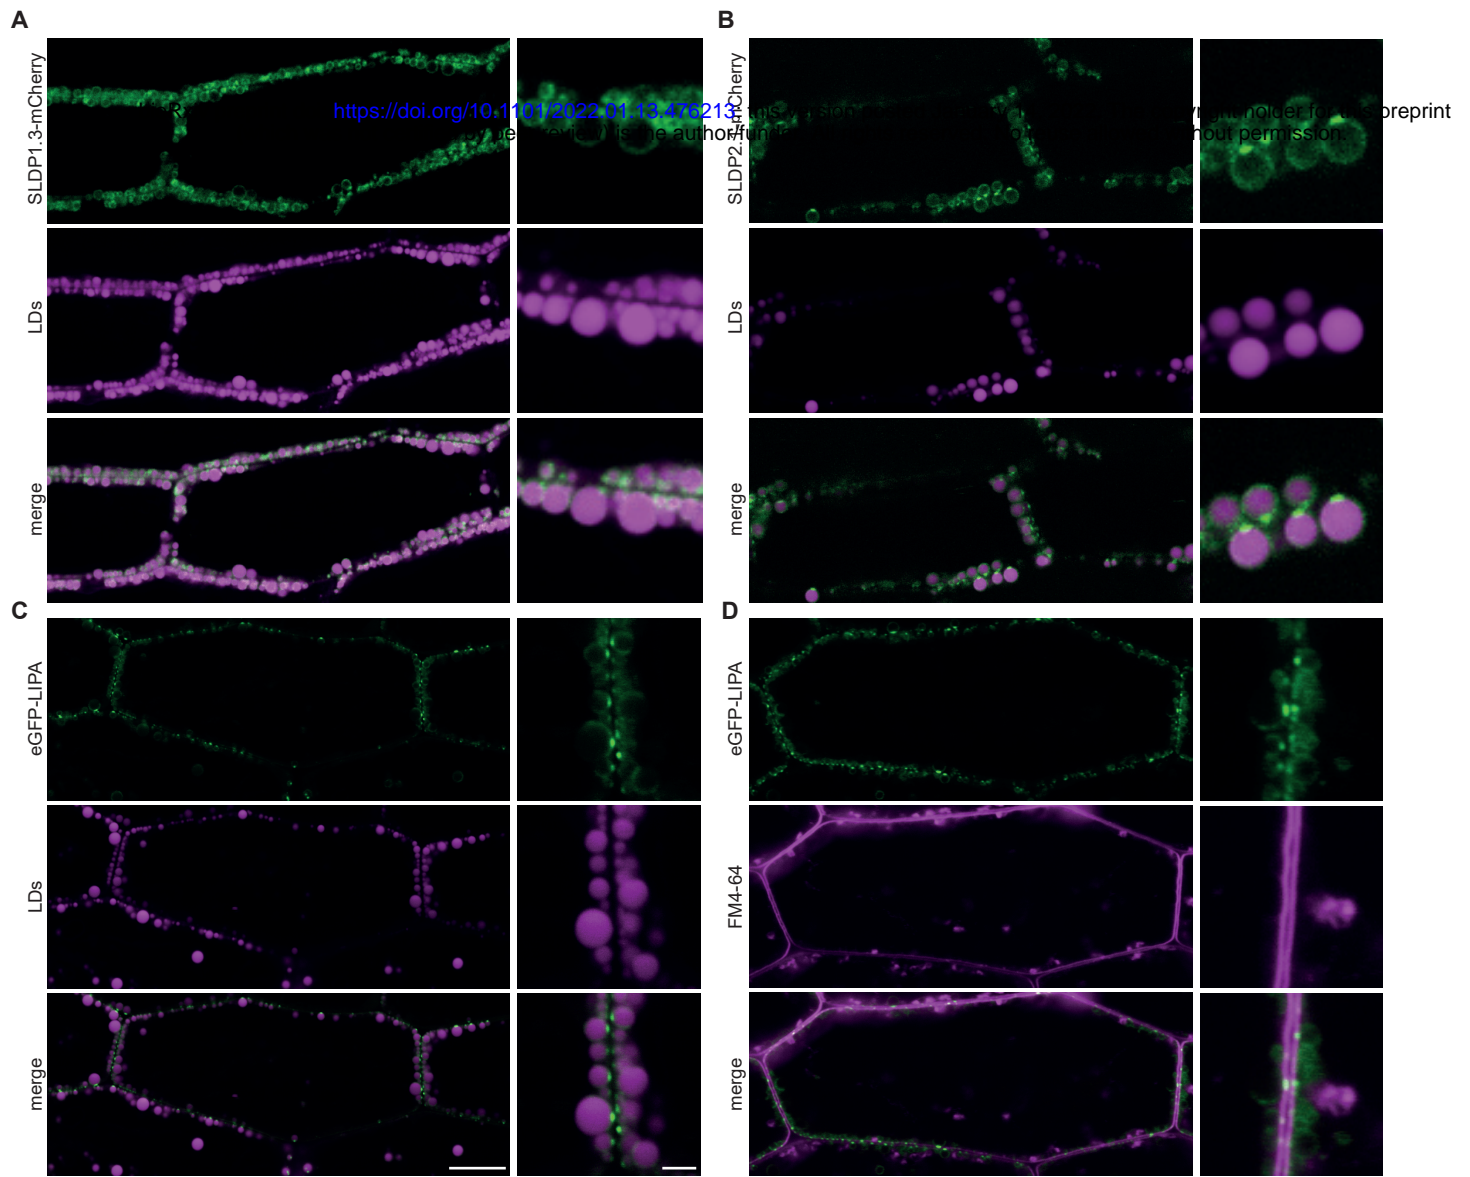

**Figure 10. Localisation of stably-expressed SLDP and LIPA in Arabidopsis seedling hypocotyls**

SLDP1.3-mCherry and SLDP2.1-mCherry (**A, B**) or eGFP-LIPA (**C, D**) were stably-expressed under the 35 S promoter in Arabidopsis Col-0 (**A, B**) or *lipa-1* mutant (**C, D**) plants. Fusion protein localisation was monitored in 38 h-old seedlings by CLSM after staining with either BODIPY 493/503 (**A, B**), Nile Red (**C**), or FM4-64 (**D**). The panels on the right display portions of the cells at higher magnification in the panels to the right. Note that the fluorescence attributable to SLDP1.3-mCherry predominantly encircled LDs (**A**), while for SLDP2.1-mCherry and eGFP-LIPA, fluorescence was enriched at putative LD-PM MCSs (**B-D**). Images are representative of at least five seedlings from each of three (**A, B**) or two independent plant lines (**C, D**). Bars, 10  $\mu$ m and 2  $\mu$ m in low and high magnified images, respectively, and applies to all the corresponding images in the other panels.

Figure 11

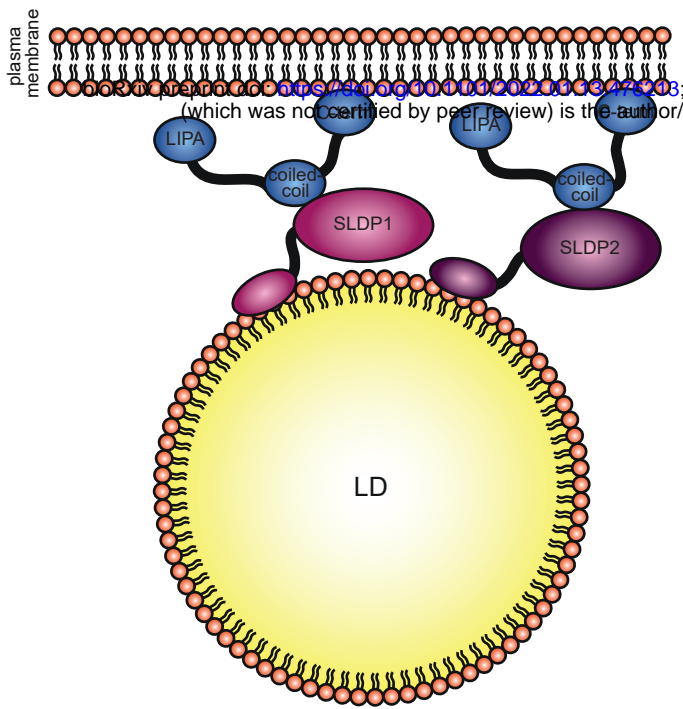

bioRxiv preprint doi: <https://doi.org/10.1101/2021.01.14.414903>; this version posted January 14, 2022. The copyright holder for this preprint (which was not certified by peer review) is the author/funder. All rights reserved. No reuse allowed without permission.

**Figure 11. Model of SLDP-LIPA mediated PM-LD MCS**

SLDP1 and SLDP2 associate with the surface of LDs via their N-terminal regions. LIPA binds to the PM through a C-terminal region and interacts with SLDP1 and SLDP2 via its coiled-coil region. The resulting SLDP1/2-LIPA interaction(s) tether the LD to the PM.



## Parsed Citations

Abraham, M.J., Murtola, T., Schulz, R., Páll, S., Smith, J.C., Hess, B., and Lindahl, E. (2015). GROMACS: High performance molecular simulations through multi-level parallelism from laptops to supercomputers. *SoftwareX* 1–2: 19–25.

Google Scholar: [Author Only](#) [Title Only](#) [Author and Title](#)

Akdel, M., Pires, D. E. V, Porta Pardo, E., Jänes, J., Zalevsky, A. O., Mészáros, B., ... Beltrao, P. (2021). A structural biology community assessment of AlphaFold 2 applications. *BioRxiv [Preprint]*, 2021.09.26.461876 [accessed 11 January 2022]. Available from: <https://doi.org/10.1101/2021.09.26.461876>.

Google Scholar: [Author Only](#) [Title Only](#) [Author and Title](#)

Bae, S., Park, J., and Kim, J.S. (2014). Cas-OFFinder: A fast and versatile algorithm that searches for potential off-target sites of Cas9 RNA-guided endonucleases. *Bioinformatics* 30: 1473–1475.

Google Scholar: [Author Only](#) [Title Only](#) [Author and Title](#)

Baillie, A.L., Falz, A.L., Müller-Schüssele, S.J., and Sparkes, I. (2020). It Started With a Kiss: Monitoring Organelle Interactions and Identifying Membrane Contact Site Components in Plants. *Front. Plant Sci.* 11: 517.

Google Scholar: [Author Only](#) [Title Only](#) [Author and Title](#)

Berardini, T.Z., Reiser, L., Li, D., Mezheritsky, Y., Muller, R., Strait, E., and Huala, E. (2015). The arabidopsis information resource: Making and mining the "gold standard" annotated reference plant genome. *Genesis* 53: 474–485.

Google Scholar: [Author Only](#) [Title Only](#) [Author and Title](#)

Bewley, J. (1997). Seed Germination and Dormancy. *Plant Cell* 9: 1055–1066.

Google Scholar: [Author Only](#) [Title Only](#) [Author and Title](#)

Bohnert, M. (2020). Tethering Fat: Tethers in Lipid Droplet Contact Sites. *Contact* 3: 251525642090814.

Google Scholar: [Author Only](#) [Title Only](#) [Author and Title](#)

Cai, Y., Goodman, J.M., Pyc, M., Mullen, R.T., Dyer, J.M., and Chapman, K.D. (2015). Arabidopsis SEIPIN Proteins Modulate Triacylglycerol Accumulation and Influence Lipid Droplet Proliferation. *Plant Cell* 27: 2616–2636.

Google Scholar: [Author Only](#) [Title Only](#) [Author and Title](#)

Chang, D.K., Cheng, S.F., Trivedi, V.D., and Lin, K.L. (1999). Proline affects oligomerization of a coiled coil by inducing a kink in a long helix. *J. Struct. Biol.* 128: 270–279.

Google Scholar: [Author Only](#) [Title Only](#) [Author and Title](#)

Cheng, H.Y., Schiavone, A.P., and Smithgall, T.E. (2001). A Point Mutation in the N-Terminal Coiled-Coil Domain Releases c-Fes Tyrosine Kinase Activity and Survival Signaling in Myeloid Leukemia Cells. *Mol. Cell. Biol.* 21: 6170–6180.

Google Scholar: [Author Only](#) [Title Only](#) [Author and Title](#)

Cheng, M.-C., Hsieh, E.-J., Chen, J.-H., Chen, H.-Y., and Lin, T.-P. (2012). Arabidopsis RGLG2, Functioning as a RING E3 Ligase, Interacts with AtERF53 and Negatively Regulates the Plant Drought Stress Response. *Plant Physiol.* 158: 363–375.

Google Scholar: [Author Only](#) [Title Only](#) [Author and Title](#)

Cockcroft, S. and Raghu, P. (2018). Phospholipid transport protein function at organelle contact sites. *Curr. Opin. Cell Biol.* 53: 52–60.

Google Scholar: [Author Only](#) [Title Only](#) [Author and Title](#)

Corradi, V., Sejdiu, B.I., Mesa-Galoso, H., Abdizadeh, H., Noskov, S.Y., Marrink, S.J., and Tieleman, D.P. (2019). Emerging Diversity in Lipid-Protein Interactions. *Chem. Rev.* 119: 5775–5848.

Google Scholar: [Author Only](#) [Title Only](#) [Author and Title](#)

Cox, J., Hein, M.Y., Luber, C.A., Paron, I., Nagaraj, N., and Mann, M. (2014). Accurate proteome-wide label-free quantification by delayed normalization and maximal peptide ratio extraction, termed MaxLFQ. *Mol. Cell. Proteomics* 13: 2513–2526.

Google Scholar: [Author Only](#) [Title Only](#) [Author and Title](#)

Cox, J. and Mann, M. (2008). MaxQuant enables high peptide identification rates, individualized p.p.b.-range mass accuracies and proteome-wide protein quantification. *Nat. Biotechnol.* 26: 1367–1372.

Google Scholar: [Author Only](#) [Title Only](#) [Author and Title](#)

Cui, S., Hayashi, Y., Otomo, M., Mano, S., Oikawa, K., Hayashi, M., and Nishimura, M. (2016). Sucrose Production Mediated by Lipid Metabolism Suppresses the Physical Interaction of Peroxisomes and Oil Bodies during Germination of Arabidopsis thaliana. *J. Biol. Chem.* 291: 19734–19745.

Google Scholar: [Author Only](#) [Title Only](#) [Author and Title](#)

Curtis, M.D. and Grossniklaus, U. (2003). A Gateway Cloning Vector Set for High-Throughput Functional Analysis of Genes in Planta. *Plant Physiol.* 133: 462–469.

Google Scholar: [Author Only](#) [Title Only](#) [Author and Title](#)

**Czechowski, T., Stitt, M., Altmann, T., Udvardi, M.K., and Scheible, W.R. (2005). Genome-wide identification and testing of superior reference genes for transcript normalization in arabidopsis. *Plant Physiol.* 139: 5–17.**

Google Scholar: [Author Only](#) [Title Only](#) [Author and Title](#)

**Eastmond, P.J. (2006). SUGAR-DEPENDENT1 encodes a patatin domain triacylglycerol lipase that initiates storage oil breakdown in germinating Arabidopsis seeds. *Plant Cell* 18: 665–675.**

Google Scholar: [Author Only](#) [Title Only](#) [Author and Title](#)

**Eisenberg-Bord, M., Shai, N., Schuldiner, M., and Bohnert, M. (2016). A Tether Is a Tether Is a Tether: Tethering at Membrane Contact Sites. *Dev. Cell* 39: 395–409.**

Google Scholar: [Author Only](#) [Title Only](#) [Author and Title](#)

**Esnay, N., Dyer, J.M., Mullen, R.T., and Chapman, K.D. (2020). Lipid Droplet–Peroxisome Connections in Plants. *Contact* 3: 251525642090876.**

Google Scholar: [Author Only](#) [Title Only](#) [Author and Title](#)

**Fan, J., Yu, L., and Xu, C. (2017). A Central Role for Triacylglycerol in Membrane Lipid Breakdown, Fatty Acid  $\beta$ -Oxidation, and Plant Survival under Extended Darkness. *Plant Physiol.* 174: 1517–1530.**

Google Scholar: [Author Only](#) [Title Only](#) [Author and Title](#)

**Freyre, C.A.C., Rauher, P.C., Ejsing, C.S., and Klemm, R.W. (2019). MIGA2 Links Mitochondria, the ER, and Lipid Droplets and Promotes De Novo Lipogenesis in Adipocytes. *Mol. Cell* 76: 811-825.e14.**

Google Scholar: [Author Only](#) [Title Only](#) [Author and Title](#)

**Gao, Q. and Goodman, J.M. (2015). The lipid droplet—a well-connected organelle. *Front. Cell Dev. Biol.* 3: 1–12.**

Google Scholar: [Author Only](#) [Title Only](#) [Author and Title](#)

**Gautier, R., Douguet, D., Antony, B., and Drin, G. (2008). HELIQUEST: A web server to screen sequences with specific  $\alpha$ -helical properties. *Bioinformatics* 24: 2101–2102.**

Google Scholar: [Author Only](#) [Title Only](#) [Author and Title](#)

**Geltinger, F., Tevini, J., Briza, P., Geiser, A., Bischof, J., Richter, K., Felder, T., and Rinnerthaler, M. (2020). The transfer of specific mitochondrial lipids and proteins to lipid droplets contributes to proteostasis upon stress and aging in the eukaryotic model system *Saccharomyces cerevisiae*. *GeroScience* 42: 19–38.**

Google Scholar: [Author Only](#) [Title Only](#) [Author and Title](#)

**Gidda, S.K., Park, S., Pyc, M., Yurchenko, O., Cai, Y., Wu, P., Andrews, D.W., Chapman, K.D., Dyer, J.M., and Mullen, R.T. (2016). Lipid droplet-associated proteins (LDAPs) are required for the dynamic regulation of neutral lipid compartmentation in plant cells. *Plant Physiol.* 170: 2052–2071.**

Google Scholar: [Author Only](#) [Title Only](#) [Author and Title](#)

**Gietz, R.D. and Schiestl, R.H. (2007). High-efficiency yeast transformation using the LiAc/SS carrier DNA/PEG method. *Nat. Protoc.* 2: 31–34.**

Google Scholar: [Author Only](#) [Title Only](#) [Author and Title](#)

**Greer, M.S., Cai, Y., Gidda, S.K., Esnay, N., Kretzschmar, F.K., Seay, D., McClinchie, E., Ischebeck, T., Mullen, R.T., Dyer, J.M., and Chapman, K.D. (2020). SEIPIN Isoforms Interact with the Membrane-Tethering Protein VAP27-1 for Lipid Droplet Formation. *Plant Cell* 32: 2932–2950.**

Google Scholar: [Author Only](#) [Title Only](#) [Author and Title](#)

**Hariri, H., Speer, N., Bowerman, J., Rogers, S., Fu, G., Reetz, E., Datta, S., Feathers, J.R., Ugrankar, R., Nicastro, D., and Henne, W.M. (2019). Mdm1 maintains endoplasmic reticulum homeostasis by spatially regulating lipid droplet biogenesis. *J. Cell Biol.* 218: 1319–1334.**

Google Scholar: [Author Only](#) [Title Only](#) [Author and Title](#)

**Hillmer, S., Viotti, C., and Robinson, D.G. (2012). An improved procedure for low-temperature embedding of high-pressure frozen and freeze-substituted plant tissues resulting in excellent structural preservation and contrast. *J. Microsc.* 247: 43–47.**

Google Scholar: [Author Only](#) [Title Only](#) [Author and Title](#)

**Hornung, E., Pernstich, C., and Feussner, I. (2002). Formation of conjugated  $\Delta$ 11  $\Delta$ 13-double bonds by  $\Delta$ 12-linoleic acid (1,4)-acyl-lipid-desaturase in pomegranate seeds. *Eur. J. Biochem.* 269: 4852–4859.**

Google Scholar: [Author Only](#) [Title Only](#) [Author and Title](#)

**Hugenroth, M. and Bohnert, M. (2020). Come a little bit closer! Lipid droplet-ER contact sites are getting crowded. *Biochim. Biophys. Acta - Mol. Cell Res.* 1867: 118603.**

Google Scholar: [Author Only](#) [Title Only](#) [Author and Title](#)

**Humphrey, W., Dalke, A., and Schulten, K. (1996). VMD: Visual molecular dynamics. *J. Mol. Graph.* 14: 33–38.**

Google Scholar: [Author Only](#) [Title Only](#) [Author and Title](#)

**Ischebeck, T., Krawczyk, H.E., Mullen, R.T., Dyer, J.M., and Chapman, K.D. (2020). Lipid droplets in plants and algae: Distribution, formation, turnover and function. *Semin. Cell Dev. Biol.* 108: 82–93.**

Google Scholar: [Author Only](#) [Title Only](#) [Author and Title](#)

**Johnson, M.R., Stephenson, R.A., Ghaemmghami, S., and Welte, M.A. (2018). Developmentally regulated H2AV buffering via dynamic sequestration to lipid droplets in *Drosophila* embryos. *Elife* 7: 1–28.**

Google Scholar: [Author Only](#) [Title Only](#) [Author and Title](#)

**Jumper, J. et al. (2021). Highly accurate protein structure prediction with AlphaFold. *Nature* 596: 583–589.**

Google Scholar: [Author Only](#) [Title Only](#) [Author and Title](#)

**Jurrus, E. et al. (2018). Improvements to the APBS biomolecular solvation software suite. *Protein Sci.* 27: 112–128.**

Google Scholar: [Author Only](#) [Title Only](#) [Author and Title](#)

**Kang, B.-H. et al. (2021). A glossary of plant cell structures: current insights and future questions. *Plant Cell*. doi: 10.1093/plcell/koab247. Online ahead of print.**

Google Scholar: [Author Only](#) [Title Only](#) [Author and Title](#)

**Klepikova, A.V., Kasianov, A.S., Gerasimov, E.S., Logacheva, M.D., and Penin, A.A. (2016). A high resolution map of the *Arabidopsis thaliana* developmental transcriptome based on RNA-seq profiling. *Plant J.* 88: 1058–1070.**

Google Scholar: [Author Only](#) [Title Only](#) [Author and Title](#)

**Kory, N., Farese, R.V., and Walther, T.C. (2016). Targeting Fat: Mechanisms of Protein Localization to Lipid Droplets. *Trends Cell Biol.* 26: 535–546.**

Google Scholar: [Author Only](#) [Title Only](#) [Author and Title](#)

**Kretzschmar, F.K., Doner, N.M., Krawczyk, H.E., Scholz, P., Schmitt, K., Valerius, O., Braus, G.H., Mullen, R.T., and Ischebeck, T. (2020). Identification of Low-Abundance Lipid Droplet Proteins in Seeds and Seedlings. *Plant Physiol.* 182: 1326–1345.**

Google Scholar: [Author Only](#) [Title Only](#) [Author and Title](#)

**Kretzschmar, F.K., Mengel, L.A., Müller, A.O., Schmitt, K., Biersch, K.F., Valerius, O., Braus, G.H., and Ischebeck, T. (2018). PUX10 Is a Lipid Droplet-Localized Scaffold Protein That Interacts with CELL DIVISION CYCLE48 and Is Involved in the Degradation of Lipid Droplet Proteins. *Plant Cell* 30: 2137–2160.**

Google Scholar: [Author Only](#) [Title Only](#) [Author and Title](#)

**Kyte, J. and Doolittle, R.F. (1982). A simple method for displaying the hydropathic character of a protein. *J. Mol. Biol.* 157: 105–132.**

Google Scholar: [Author Only](#) [Title Only](#) [Author and Title](#)

**Livak, K.J. and Schmittgen, T.D. (2001). Analysis of relative gene expression data using real-time quantitative PCR and the 2- $\Delta\Delta CT$  method. *Methods* 25: 402–408.**

Google Scholar: [Author Only](#) [Title Only](#) [Author and Title](#)

**Lundquist, P.K., Shivaiah, K.K., and Espinoza-Corral, R. (2020). Lipid droplets throughout the evolutionary tree. *Prog. Lipid Res.* 78: 101029.**

Google Scholar: [Author Only](#) [Title Only](#) [Author and Title](#)

**Lupas, A., Van Dyke, M., and Stock, J. (1991). Predicting coiled coils from protein sequences. *Science* (80- ). 252: 1162–1164.**

Google Scholar: [Author Only](#) [Title Only](#) [Author and Title](#)

**Marrink, S.J., Corradi, V., Souza, P.C.T., Ingólfsson, H.I., Tieleman, D.P., and Sansom, M.S.P. (2019). Computational Modeling of Realistic Cell Membranes. *Chem. Rev.* 119: 6184–6226.**

Google Scholar: [Author Only](#) [Title Only](#) [Author and Title](#)

**Mier, P., Alanis-Lobato, G., and Andrade-Navarro, M.A. (2017). Protein-protein interactions can be predicted using coiled coil co-evolution patterns. *J. Theor. Biol.* 412: 198–203.**

Google Scholar: [Author Only](#) [Title Only](#) [Author and Title](#)

**Miquel, M. and Browse, J. (1992). *Arabidopsis* mutants deficient in polyunsaturated fatty acid synthesis: Biochemical and genetic characterization of a plant oleoyl-phosphatidylcholine desaturase. *J. Biol. Chem.* 267: 1502–1509.**

Google Scholar: [Author Only](#) [Title Only](#) [Author and Title](#)

**Mirdita, M., Schütze, K., Moriwaki, Y., Heo, L., Ovchinnikov, S., & Steinegger, M. (2021). ColabFold - Making protein folding accessible to all. *BioRxiv* [Preprint], 2021.08.15.456425 [accessed 11 January 2022]. Available from: <https://doi.org/10.1101/2021.08.15.456425>.**

Google Scholar: [Author Only](#) [Title Only](#) [Author and Title](#)

**Muliyil, S., Levet, C., Düsterhöft, S., Dulloo, I., Cowley, S.A., and Freeman, M. (2020). ADAM 17-triggered TNF signalling protects the ageing *Drosophila* retina from lipid droplet-mediated degeneration. *EMBO J.* 39:e104415.**

Google Scholar: [Author Only](#) [Title Only](#) [Author and Title](#)

**Müller, A.O., Biersch, K.F., Gippert, A.L., and Ischebeck, T. (2017). Tobacco pollen tubes - a fast and easy tool for studying lipid**

**droplet association of plant proteins. Plant J. 89: 1055–1064.**

Google Scholar: [Author Only](#) [Title Only](#) [Author and Title](#)

**Müller, A.O. and Ischebeck, T. (2018). Characterization of the enzymatic activity and physiological function of the lipid droplet-associated triacylglycerol lipase AtOBL1. New Phytol. 217: 1062–1076.**

Google Scholar: [Author Only](#) [Title Only](#) [Author and Title](#)

**Murashige, T. and Skoog, F. (1962). A Revised Medium for Rapid Growth and Bio Assays with Tobacco Tissue Cultures. Physiol. Plant. 15: 473–497.**

Google Scholar: [Author Only](#) [Title Only](#) [Author and Title](#)

**Nakabayashi, K., Okamoto, M., Koshiba, T., Kamiya, Y., and Nambara, E. (2005). Genome-wide profiling of stored mRNA in Arabidopsis thaliana seed germination: Epigenetic and genetic regulation of transcription in seed. Plant J. 41: 697–709.**

Google Scholar: [Author Only](#) [Title Only](#) [Author and Title](#)

**Needleman, S.B. and Wunsch, C.D. (1970). A general method applicable to the search for similarities in the amino acid sequence of two proteins. J. Mol. Biol. 48: 443–453.**

Google Scholar: [Author Only](#) [Title Only](#) [Author and Title](#)

**Noack, L.C. and Jaillais, Y. (2020). Functions of Anionic Lipids in Plants. Annu. Rev. Plant Biol. 71: 71–102.**

Google Scholar: [Author Only](#) [Title Only](#) [Author and Title](#)

**Notredame, C., Higgins, D.G., and Heringa, J. (2000). T-coffee: A novel method for fast and accurate multiple sequence alignment. J. Mol. Biol. 302: 205–217.**

Google Scholar: [Author Only](#) [Title Only](#) [Author and Title](#)

**Olzmann, J.A. and Carvalho, P. (2019). Dynamics and functions of lipid droplets. Nat. Rev. Mol. Cell Biol. 20: 137–155.**

Google Scholar: [Author Only](#) [Title Only](#) [Author and Title](#)

**Park, J., Bae, S., and Kim, J.S. (2015). Cas-Designer: A web-based tool for choice of CRISPR-Cas9 target sites. Bioinformatics 31: 4014–4016.**

Google Scholar: [Author Only](#) [Title Only](#) [Author and Title](#)

**Petrie, J.R., Shrestha, P., Liu, Q., Mansour, M.P., Wood, C.C., Zhou, X.R., Nichols, P.D., Green, A.G., and Singh, S.P. (2010). Rapid expression of transgenes driven by seed-specific constructs in leaf tissue: DHA production. Plant Methods 6: 8.**

Google Scholar: [Author Only](#) [Title Only](#) [Author and Title](#)

**Prinz, W.A., Toulmay, A., and Balla, T. (2020). The functional universe of membrane contact sites. Nat. Rev. Mol. Cell Biol. 21: 7–24.**

Google Scholar: [Author Only](#) [Title Only](#) [Author and Title](#)

**Pyc, M. et al. (2021). LDIP cooperates with SEIPIN and LDAP to facilitate lipid droplet biogenesis in Arabidopsis. Plant Cell 33: 3076–3103.**

Google Scholar: [Author Only](#) [Title Only](#) [Author and Title](#)

**Pyc, M., Cai, Y., Gidda, S.K., Yurchenko, O., Park, S., Kretschmar, F.K., Ischebeck, T., Valerius, O., Braus, G.H., Chapman, K.D., Dyer, J.M., and Mullen, R.T. (2017). Arabidopsis lipid droplet-associated protein (LDAP) – interacting protein (LDIP) influences lipid droplet size and neutral lipid homeostasis in both leaves and seeds. Plant J. 92: 1182–1201.**

Google Scholar: [Author Only](#) [Title Only](#) [Author and Title](#)

**Read, S.M., Clarke, A.E., and Bacic, A. (1993). Stimulation of growth of cultured Nicotiana tabacum W 38 pollen tubes by poly(ethylene glycol) and Cu(II) salts. Protoplasma 177: 1–14.**

Google Scholar: [Author Only](#) [Title Only](#) [Author and Title](#)

**Richardson, L. G. L., Howard, A. S. M., Khuu, N., Gidda, S. K., McCartney, A., Morphy, B. J., & Mullen, R. T. (2011). Protein–Protein Interaction Network and Subcellular Localization of the Arabidopsis Thaliana ESCRT Machinery. Frontiers in Plant Science, 2: 20.**

Google Scholar: [Author Only](#) [Title Only](#) [Author and Title](#)

**Rossini, M., Pizzo, P., and Filadi, R. (2020). Better to keep in touch: investigating inter-organelle cross-talk. FEBS J.: 288: 740-755.**

Google Scholar: [Author Only](#) [Title Only](#) [Author and Title](#)

**Rotsch, A.H., Kopka, J., Feussner, I., and Ischebeck, T. (2017). Central metabolite and sterol profiling divides tobacco male gametophyte development and pollen tube growth into eight metabolic phases. Plant J. 92: 129–146.**

Google Scholar: [Author Only](#) [Title Only](#) [Author and Title](#)

**Rueden, C.T., Schindelin, J., Hiner, M.C., DeZonia, B.E., Walter, A.E., Arena, E.T., and Eliceiri, K.W. (2017). ImageJ2: ImageJ for the next generation of scientific image data. BMC Bioinformatics 18: 1–26.**

Google Scholar: [Author Only](#) [Title Only](#) [Author and Title](#)

**Rylott, E.L., Rogers, C.A., Gilday, A.D., Edgell, T., Larson, T.R., and Graham, I.A. (2003). Arabidopsis Mutants in Short- and Medium-chain Acyl-CoA Oxidase Activities Accumulate Acyl-CoAs and Reveal That Fatty Acid  $\beta$ -Oxidation Is Essential for Embryo**

**Development. J. Biol. Chem. 278: 21370–21377.**

Google Scholar: [Author Only](#) [Title Only](#) [Author and Title](#)

**Salo, V.T. et al. (2019). Seipin Facilitates Triglyceride Flow to Lipid Droplet and Counteracts Droplet Ripening via Endoplasmic Reticulum Contact. Dev. Cell 50: 478–493.e9.**

Google Scholar: [Author Only](#) [Title Only](#) [Author and Title](#)

**Schaffer, J.E. (2003). Lipotoxicity: when tissues overeate. Curr. Opin. Lipidol. 14: 281–287.**

Google Scholar: [Author Only](#) [Title Only](#) [Author and Title](#)

**Schapiro, A.L., Voigt, B., Jasik, J., Rosado, A., Lopez-Cobollo, R., Menzel, D., Salinas, J., Mancuso, S., Valpuesta, V., Baluska, F., and Botella, M.A. (2008). Arabidopsis synaptotagmin 1 is required for the maintenance of plasma membrane integrity and cell viability. Plant Cell 20: 3374–3388.**

Google Scholar: [Author Only](#) [Title Only](#) [Author and Title](#)

**Schauder, C.M., Wu, X., Saheki, Y., Narayanaswamy, P., Torta, F., Wenk, M.R., De Camilli, P., and Reinisch, K.M. (2014). Structure of a lipid-bound extended synaptotagmin indicates a role in lipid transfer. Nature 510: 552–555.**

Google Scholar: [Author Only](#) [Title Only](#) [Author and Title](#)

**Schmid, M., Davison, T.S., Henz, S.R., Pape, U.J., Demar, M., Vingron, M., Schölkopf, B., Weigel, D., and Lohmann, J.U. (2005). A gene expression map of Arabidopsis thaliana development. Nat. Genet. 37: 501–506.**

Google Scholar: [Author Only](#) [Title Only](#) [Author and Title](#)

**Schuldiner, M. and Bohnert, M. (2017). A different kind of love – lipid droplet contact sites. Biochim. Biophys. Acta - Mol. Cell Biol. Lipids 1862: 1188–1196.**

Google Scholar: [Author Only](#) [Title Only](#) [Author and Title](#)

**Shai, N. et al. (2018). Systematic mapping of contact sites reveals tethers and a function for the peroxisome-mitochondria contact. Nat. Commun. 9: 1761.**

Google Scholar: [Author Only](#) [Title Only](#) [Author and Title](#)

**Shai, N., Schuldiner, M., and Zalckvar, E. (2016). No peroxisome is an island - Peroxisome contact sites. Biochim. Biophys. Acta - Mol. Cell Res. 1863: 1061–1069.**

Google Scholar: [Author Only](#) [Title Only](#) [Author and Title](#)

**Shockey, J.M., Gidda, S.K., Chapital, D.C., Kuan, J.C., Dhanoa, P.K., Bland, J.M., Rothstein, S.J., Mullen, R.T., and Dyer, J.M. (2006). Tung tree DGAT1 and DGAT2 have nonredundant functions in triacylglycerol biosynthesis and are localized to different subdomains of the endoplasmic reticulum. Plant Cell 18: 2294–2313.**

Google Scholar: [Author Only](#) [Title Only](#) [Author and Title](#)

**Siao, W., Wang, P., Voigt, B., Hussey, P.J., and Baluska, F. (2016). Arabidopsis SYT1 maintains stability of cortical endoplasmic reticulum networks and VAP27-1-enriched endoplasmic reticulum-plasma membrane contact sites. J. Exp. Bot. 67: 6161–6171.**

Google Scholar: [Author Only](#) [Title Only](#) [Author and Title](#)

**Souza, P.C.T. et al. (2021). Martini 3: a general purpose force field for coarse-grained molecular dynamics. Nat. Methods 18: 382–388.**

Google Scholar: [Author Only](#) [Title Only](#) [Author and Title](#)

**Sparkes, I.A., Runions, J., Kearns, A., and Hawes, C. (2006). Rapid, transient expression of fluorescent fusion proteins in tobacco plants and generation of stably transformed plants. Nat. Protoc. 1: 2019–2025.**

Google Scholar: [Author Only](#) [Title Only](#) [Author and Title](#)

**Srinivasan, S., Zoni, V., and Vanni, S. (2021). Estimating the accuracy of the MARTINI model towards the investigation of peripheral protein–membrane interactions. Faraday Discuss. 232: 131–148.**

Google Scholar: [Author Only](#) [Title Only](#) [Author and Title](#)

**Sui, X., Arlt, H., Brock, K.P., Lai, Z.W., DiMaio, F., Marks, D.S., Liao, M., Farese, R. V., and Walther, T.C. (2018). Cryo–electron microscopy structure of the lipid droplet–formation protein seipin. J. Cell Biol. 217: jcb.201809067.**

Google Scholar: [Author Only](#) [Title Only](#) [Author and Title](#)

**Thiam, A.R. and Beller, M. (2017). The why, when and how of lipid droplet diversity. J. Cell Sci. 130: 315–324.**

Google Scholar: [Author Only](#) [Title Only](#) [Author and Title](#)

**Twell, D., Yamaguchi, J., Wing, R.A., Ushiba, J., and McCormick, S. (1991). Promoter analysis of genes that are coordinately expressed during pollen development reveals pollen-specific enhancer sequences and shared regulatory elements. Genes Dev. 5: 496–507.**

Google Scholar: [Author Only](#) [Title Only](#) [Author and Title](#)

**Tyanova, S., Temu, T., Sinitcyn, P., Carlson, A., Hein, M.Y., Geiger, T., Mann, M., and Cox, J. (2016). The Perseus computational platform for comprehensive analysis of (prote)omics data. Nat. Methods 13: 731–740.**

Google Scholar: [Author Only](#) [Title Only](#) [Author and Title](#)

**Ugrankar, R. et al. (2019).** *Drosophila Snazarus Regulates a Lipid Droplet Population at Plasma Membrane-Droplet Contacts in Adipocytes.* *Dev. Cell* 50: 557-572.e5.

Google Scholar: [Author Only](#) [Title Only](#) [Author and Title](#)

**Valm, A.M., Cohen, S., Legant, W.R., Melunis, J., Hershberg, U., Wait, E., Cohen, A.R., Davidson, M.W., Betzig, E., and Lippincott-Schwartz, J. (2017).** Applying systems-level spectral imaging and analysis to reveal the organelle interactome. *Nature* 546: 162–167.

Google Scholar: [Author Only](#) [Title Only](#) [Author and Title](#)

**Varadi, M. et al. (2022).** AlphaFold Protein Structure Database: massively expanding the structural coverage of protein-sequence space with high-accuracy models. *Nucleic Acids Res.* 50: D439–D444.

Google Scholar: [Author Only](#) [Title Only](#) [Author and Title](#)

**Velázquez, A.P., Tatsuta, T., Ghillebert, R., Drescher, I., and Graef, M. (2016).** Lipid droplet-mediated ER homeostasis regulates autophagy and cell survival during starvation. *J. Cell Biol.* 212: 621–631.

Google Scholar: [Author Only](#) [Title Only](#) [Author and Title](#)

**Vizcaino, J.A. et al. (2014).** ProteomeXchange provides globally coordinated proteomics data submission and dissemination. *Nat. Biotechnol.* 32: 223–226.

Google Scholar: [Author Only](#) [Title Only](#) [Author and Title](#)

**de Vries, J. and Ischebeck, T. (2020).** Ties between Stress and Lipid Droplets Pre-date Seeds. *Trends Plant Sci.* 25: 1203–1214.

Google Scholar: [Author Only](#) [Title Only](#) [Author and Title](#)

**Waese, J. et al. (2017).** ePlant: Visualizing and Exploring Multiple Levels of Data for Hypothesis Generation in Plant Biology. *Plant Cell* 29: 1806–1821.

Google Scholar: [Author Only](#) [Title Only](#) [Author and Title](#)

**Wang, Z.-P., Xing, H.-L., Dong, L., Zhang, H.-Y., Han, C.-Y., Wang, X.-C., and Chen, Q.-J. (2015).** Egg cell-specific promoter-controlled CRISPR/Cas9 efficiently generates homozygous mutants for multiple target genes in Arabidopsis in a single generation. *Genome Biol.* 16: 144.

Google Scholar: [Author Only](#) [Title Only](#) [Author and Title](#)

**Wassenaar, T.A., Ingólfsson, H.I., Böckmann, R.A., Tieleman, D.P., and Marrink, S.J. (2015).** Computational Lipidomics with insane : A Versatile Tool for Generating Custom Membranes for Molecular Simulations. *J. Chem. Theory Comput.* 11: 2144–2155.

Google Scholar: [Author Only](#) [Title Only](#) [Author and Title](#)

**Welte, M.A. and Gould, A.P. (2017).** Lipid droplet functions beyond energy storage. *Biochim. Biophys. Acta - Mol. Cell Biol. Lipids* 1862: 1260–1272.

Google Scholar: [Author Only](#) [Title Only](#) [Author and Title](#)

**Wilfling, F. et al. (2013).** Triacylglycerol synthesis enzymes mediate lipid droplet growth by relocating from the ER to lipid droplets. *Dev. Cell* 24: 384–399.

Google Scholar: [Author Only](#) [Title Only](#) [Author and Title](#)

**Winter, D., Vinegar, B., Nahal, H., Ammar, R., Wilson, G. V., and Provart, N.J. (2007).** An "electronic fluorescent pictograph" Browser for exploring and analyzing large-scale biological data sets. *PLoS One* 2: 1–12.

Google Scholar: [Author Only](#) [Title Only](#) [Author and Title](#)

**Xie, Y., Zheng, Y., Li, H., Luo, X., He, Z., Cao, S., Shi, Y., Zhao, Q., Xue, Y., Zuo, Z., and Ren, J. (2016).** GPS-Lipid: A robust tool for the prediction of multiple lipid modification sites. *Sci. Rep.* 6: 1–9.

Google Scholar: [Author Only](#) [Title Only](#) [Author and Title](#)

**Xing, H.-L., Dong, L., Wang, Z.-P., Zhang, H.-Y., Han, C.-Y., Liu, B., Wang, X.-C., and Chen, Q.-J. (2014).** A CRISPR/Cas9 toolkit for multiplex genome editing in plants. *BMC Plant Biol.* 14: 327.

Google Scholar: [Author Only](#) [Title Only](#) [Author and Title](#)

**Yamazaki, T., Kawamura, Y., Minami, A., and Uemura, M. (2008).** Calcium-dependent freezing tolerance in arabidopsis involves membrane resealing via synaptotagmin SYT1. *Plant Cell* 20: 3389–3404.

Google Scholar: [Author Only](#) [Title Only](#) [Author and Title](#)

**Yang, H.J., Hsu, C.L., Yang, J.Y., and Yang, W.Y. (2012).** Monodansylpentane as a blue-fluorescent lipid-droplet marker for multi-color live-cell imaging. *PLoS One* 7.

Google Scholar: [Author Only](#) [Title Only](#) [Author and Title](#)

**Yang, Y. and Benning, C. (2018).** Functions of triacylglycerols during plant development and stress. *Curr. Opin. Biotechnol.* 49: 191–198.

Google Scholar: [Author Only](#) [Title Only](#) [Author and Title](#)

**Yu, H., Liu, Y., Gulbranson, D.R., Paine, A., Rathore, S.S., and Shen, J. (2016). Extended synaptotagmins are Ca<sup>2+</sup>-dependent lipid transfer proteins at membrane contact sites. *Proc. Natl. Acad. Sci. U. S. A.* 113: 4362–4367.**

Google Scholar: [Author Only](#) [Title Only](#) [Author and Title](#)

**Yu, J., Kang, L., Li, Y., Wu, C., Zheng, C., Liu, P., and Huang, J. (2021). RING finger protein RGLG1 and RGLG2 negatively modulate MAPKKK18 mediated drought stress tolerance in Arabidopsis. *J. Integr. Plant Biol.* 63: 484–493.**

Google Scholar: [Author Only](#) [Title Only](#) [Author and Title](#)

**Zang, J., Zhang, T., Hussey, P.J., And Wang, P. (2020). Light microscopy of the endoplasmic reticulum–membrane contact sites in plants. *J. Microsc.* 280: 134–139.**

Google Scholar: [Author Only](#) [Title Only](#) [Author and Title](#)
